# Supplementary material for: Towards pi-extended cycloparaphenylenes as seeds for CNT growth: investigating strain relieving ring-openings and rearrangements
Source: PubMed Central journal article supplement (PMC6008588; doi:10.1039/c5sc04218f), 2016-02-18

**TOWARDS PI-EXTENDED CYCLOPARAPHENYLENES AS SEEDS FOR CNT  
GROWTH: INVESTIGATING STRAIN RELIEVING RING-OPENINGS AND  
REARRANGEMENTS**

Thomas J. Sisto<sup>†</sup>, Lev Zakharov<sup>‡</sup>, Brittany M. White<sup>†</sup>, and Ramesh Jasti<sup>\*†</sup>

<sup>†</sup>Department of Chemistry & Biochemistry and Materials Science Institute, University of Oregon, Eugene,  
Oregon 97403-1253, United States

<sup>‡</sup>Camcor, University of Oregon, Eugene, Oregon 97403-1253

## Table Of Contents

|                                                                                 |                 |
|---------------------------------------------------------------------------------|-----------------|
| <b>1) General Experimental.....</b>                                             | <b>S2-S3</b>    |
| <b>2) Procedures and Characterization.....</b>                                  | <b>S4-S20</b>   |
| <b>3) Spectra.....</b>                                                          | <b>S21-S31</b>  |
| <b>4) Triflic Acid Scholl Reaction Procedures and Characterization...S32-43</b> |                 |
| <b>5) Computational Data.....</b>                                               | <b>S44-104</b>  |
| <b>6) X-Ray Crystallography Data.....</b>                                       | <b>S105-106</b> |
| <b>7) CNT Yield from CPP Templated Growth.....</b>                              | <b>S107</b>     |
| <b>8) HOMO Orbital Coefficients of Fully Aryl-Substituted 12.....</b>           | <b>S107</b>     |

**General Experimental Details.**  $^1\text{H}$  NMR spectra were recorded at 500 MHz on a Varian VNMRS, at 400 MHz on a Varian VNMRS, or at 600 MHz on a Bruker Avance-III-HD spectrometer.  $^{13}\text{C}$  NMR spectra were recorded at 125 MHz on a Varian VNMRS, 100 MHz on a Varian VNMRS, or 150 MHz on a Bruker Avance-III-HD spectrometer. All NMR spectra in  $\text{CDCl}_3$  were referenced to TMS. All reagents were obtained commercially. Tetrahydrofuran, dichloromethane, and dimethylformamide were dried by filtration through alumina according to the methods described by Grubbs<sup>1</sup>. Silica column chromatography was conducted with Zeochem Zeoprep 60 Eco 40-63  $\mu\text{m}$  silica gel. Thin Layer Chromatography (TLC) was performed using Sorbent Technologies Silica Gel XHT TLC plates or Sorbent Technologies Alumina TLC plates respectively. Developed plates were visualized using UV light at wavelengths of 254 and 365 nm. Gel permeation chromatography was performed using a Japan Analytical Industry Co. Ltd. recycling preparative HPLC fitted with Jaigel-2H polystyrene/divinylbenzene columns at a flow rate of 3.5 mL/min. All glassware was oven or flame dried and cooled under an inert atmosphere of nitrogen unless otherwise noted. Moisture sensitive reactions were carried out under an inert atmosphere of nitrogen using standard syringe/septa technique. Calculations were performed using Gaussian 09. All structures were optimized at the B3LYP/6-31+G(d,p) or B3LYP/6-31(d,p) as noted. Vibrational analysis was conducted for all structures, with minima displaying no imaginary modes and transition states displaying one imaginary mode.

---

<sup>1</sup> Pangborn, A. B.; Giardello, M. A.; Grubbs, R. H.; Rosen, R. K.; Timmers, F. J. *Organometallics* **1996**, *15*, 1518-1520.

**Complete Gaussian Reference:**

Gaussian 09, Revision B.01, M. J. Frisch, G. W. Trucks, H. B. Schlegel, G. E. Scuseria, M. A. Robb, J. R. Cheeseman, G. Scalmani, V. Barone, B. Mennucci, G. A. Petersson, H. Nakatsuji, M. Caricato, X. Li, H. P. Hratchian, A. F. Izmaylov, J. Bloino, G. Zheng, J. L. Sonnenberg, M. Hada, M. Ehara, K. Toyota, R. Fukuda, J. Hasegawa, M. Ishida, T. Nakajima, Y. Honda, O. Kitao, H. Nakai, T. Vreven, J. A. Montgomery, Jr., J. E. Peralta, F. Ogliaro, M. Bearpark, J. J. Heyd, E. Brothers, K. N. Kudin, V. N. Staroverov, T. Keith, R. Kobayashi, J. Normand, K. Raghavachari, A. Rendell, J. C. Burant, S. S. Iyengar, J. Tomasi, M. Cossi, N. Rega, J. M. Millam, M. Klene, J. E. Knox, J. B. Cross, V. Bakken, C. Adamo, J. Jaramillo, R. Gomperts, R. E. Stratmann, O. Yazyev, A. J. Austin, R. Cammi, C. Pomelli, J. W. Ochterski, R. L. Martin, K. Morokuma, V. G. Zakrzewski, G. A. Voth, P. Salvador, J. J. Dannenberg, S. Dapprich, A. D. Daniels, O. Farkas, J. B. Foresman, J. V. Ortiz, J. Cioslowski, and D. J. Fox, Gaussian, Inc., Wallingford CT, 2010.

## Procedures and Characterization.

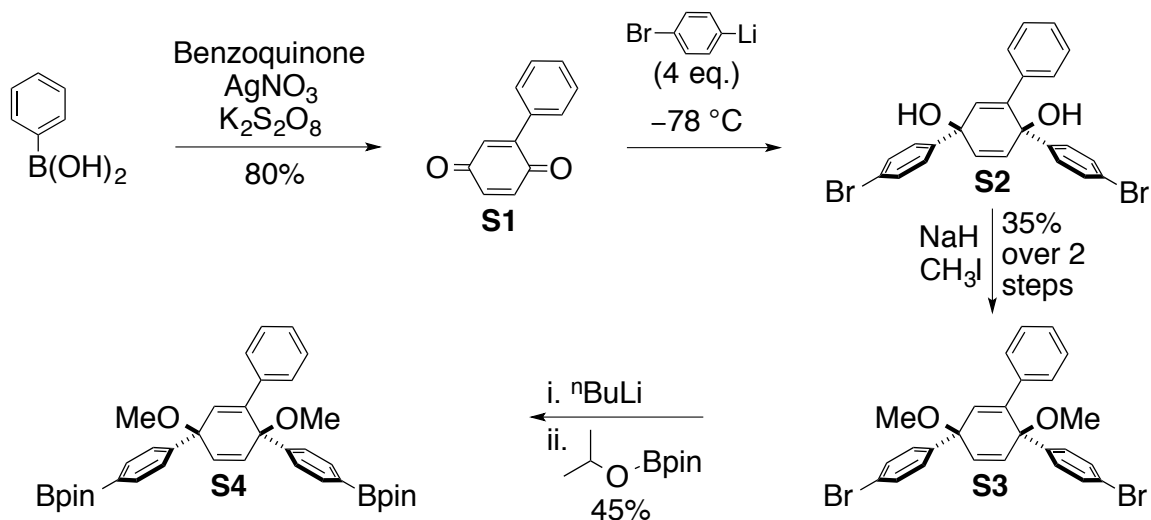

**Figure S1.** Synthetic route to mono-aryl [8]CPP **19**.

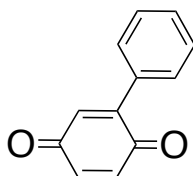

**2-Phenyl-1,4-benzoquinone S1.** A procedure outlined by Baran was followed<sup>2</sup>. Purification was achieved using silica gel chromatography (hexanes/ethyl acetate, 9:1), followed by recrystallization in hot hexanes. All spectroscopic data was consistent with those reported in the literature.

<sup>2</sup> Fujiwara, Y.; Domingo, V.; Seiple, I.B.; Gianatassio, R.; Del Bel, M.; Baran, P. S. *J. Am. Chem. Soc.* **2011**, *133*, 3292-3295

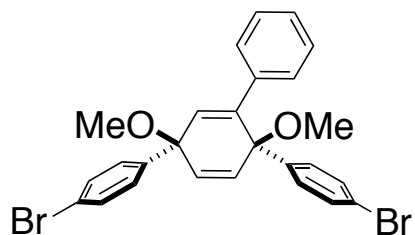

**Dibromide S3.** To a dry 500 mL round bottom flask charged with a large magnetic stir bar, 1,4-dibromobenzene (16.15 g, 68.46 mmol, 4.2 equiv), and THF (300 mL) at  $-78\text{ }^{\circ}\text{C}$  was added 2.5 M  $n\text{BuLi}$  dropwise (28 mL, 70.09 mmol, 4.3 equiv), at which point the reaction mixture became a slurry. The slurry was allowed to stir for 30 minutes at  $-78\text{ }^{\circ}\text{C}$ . This reaction mixture was cannulated dropwise into a separately cooled ( $-78\text{ }^{\circ}\text{C}$ ) dry 1 L round bottom flask charged with a spinning magnetic stir bar, quinone **S1** (3 g, 16.3 mmol, 1 equiv), and dry THF (360 mL), at which point the new reaction mixture was allowed to continue to stir for 15 minutes. Upon completion, the reaction mixture was quenched with  $\text{H}_2\text{O}$  (150 mL) and allowed to warm to room temperature. Upon separation of the layers, the aqueous layer was extracted with ethyl acetate (3 X 150 mL) and the combined organic layers were washed with a saturated brine solution (150 mL) and dried over sodium sulfate. Concentration under reduced pressure afforded a brown oil that was crudely purified (this crude purification is not necessary, however subsequent purification after the next step becomes significantly easier) via silica gel chromatography (flushed with 1:9 ethyl acetate:hexanes and eluted with 5:5 ethyl acetate:hexanes) to afford a semi-crude brown diol (**S2**) that was used in the next reaction.

To a dry 250 mL round bottom flask was added a stir bar, sodium hydride (2.608 g as a 60% suspension in oil, 65.2 mmol, 4 equiv), and dry THF (130 mL). This slurry was cooled to 0 °C, at which point the semi-crude diol (**S2**) was introduced dropwise as a solution in dry THF (20 mL). The reaction mixture was allowed to stir for 30 minutes at 0°C. Neat methyl iodide was then injected as a stream (13.8 g, 6.06 mL, 97.8 mmol, 6 equiv) and the reaction mixture was allowed to warm to room temperature and stir for 16 hours. The excess sodium hydride was quenched slowly by the addition of H<sub>2</sub>O (50 mL) and the layers were separated. The aqueous layer was extracted with ethyl acetate (3 X 50 mL) and the combined organic layers were washed with a saturated brine solution (100 mL), dried over sodium sulfate, and concentrated under reduced pressure to afford a crude oil. The crude oil was purified by silica gel chromatography (0:10 to 1:9 dichloromethane:hexanes) to afford **S3** as a colorless oil (3.1 g, 36%) IR (neat) 3055.62, 3028.78, 2985.25, 2938.62, 2823.21, 2246.63, 1586.82, 1484.16, 1395.28, 1171.56, 1072.42, 1009.09, 951.27, 907.31, 826.09, 730.29 cm<sup>-1</sup>; <sup>1</sup>H NMR (400 MHz, CDCl<sub>3</sub>) δ 7.48 (d, *J* = 8.38 Hz, 2H), 7.35 (overlap, 4H), 7.27-7.23 (overlap, 2H), 7.21-7.16 (overlap, 5H), 6.48 (d, *J* = 1.52 Hz, 1H), 6.06 (dd, *J* = 9.99, 1.52 Hz, 1H), 6.02 (d, *J* = 9.99 Hz, 1H), 3.46 (s, 3H), 3.35 (s, 3H); <sup>13</sup>C NMR (400 MHz, CDCl<sub>3</sub>) δ 142.48, 142.32, 140.52, 137.57, 136.96, 134.42, 131.64, 131.42, 129.48, 128.08, 127.99, 127.95, 127.88, 127.77, 121.95, 121.36, 77.55, 75.44, 52.07, 51.73; HRMS was attempted by ESI or MALDI for this compound, however no sample ionized. Subsequent transformations of this compound are characterized with HRMS.

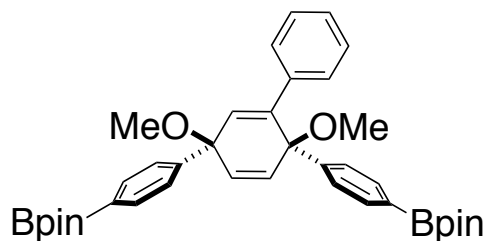

**Diboronate S4.** To a 50 mL dry roundbottom flask charged with a dry stirbar, dibromide **S3** (500 mg, 0.95 mmol, 1 equiv) and THF (10 mL) at  $-78\text{ }^{\circ}\text{C}$  was introduced 2.5 M  $n\text{BuLi}$  (0.836 mL, 2.09 mmol, 2.2 equiv.) dropwise over the course of 2 minutes. The reaction was stirred an additional 30 seconds, at which point neat isopropyl pinacol borate (707 mg, 0.775 mL, 3.8 mmol, 4 equiv.) was introduced quickly as a stream<sup>3</sup>. Upon introduction of isopropyl pinacol borate the reaction mixture was stirred for 1 hour at  $-78\text{ }^{\circ}\text{C}$ , at which point the reaction was quenched with  $\text{H}_2\text{O}$  (20 mL) and allowed to warm to room temperature. The reaction mixture was diluted with ethyl acetate (30 mL), the layers were separated, and the aqueous layer was extracted (3 X 20 mL) with ethyl acetate. The organic layers were combined, washed with brine, and dried over sodium sulfate before being evaporated under reduced pressure to afford a crude oil. This oil was purified via silica gel chromatography (1:19 ethyl acetate:hexanes) to afford **S4** as an oil (265 mg, 45%). IR (neat) 2978.67, 2933.95, 2823.93, 1609.31, 1397.89, 1358.54, 1319.91, 1270.52, 1143.58, 1086.59, 1018.18, 950.54, 858.61, 737.26  $\text{cm}^{-1}$ ;  $^1\text{H}$  NMR (500 MHz,  $\text{CDCl}_3$ )  $\delta$  7.83 (d,  $J = 8.45\text{ Hz}$ , 2H), 7.71 (d,  $J = 8.45\text{ Hz}$ , 2H), 7.45 (d,  $J = 8.45\text{ Hz}$ , 2H), 7.40 (d,  $J = 8.45\text{ Hz}$ , 2H) 7.29-7.27 (overlap, 2H), 7.19-7.13 (overlap, 3H),

---

<sup>3</sup> The timing associated with the introduction, subsequent stir, and quench of  $n\text{BuLi}$  with isopropyl pinacol borate is critical to the success of the reaction.

6.56 (d,  $J = 2.23$ , 1H), 6.11 (dd,  $J = 10.05, 2.23$  Hz, 1H), 6.05 (d,  $J = 10.05$  Hz, 1H), 3.50 (s, 3H), 3.39 (s, 3H), 1.38 (s, 6H), 1.37 (s, 6H), 1.36 (s, 6H), 1.35 (s, 6H);  $^{13}\text{C}$  NMR (500 MHz,  $\text{CDCl}_3$ )  $\delta$  146.47, 146.45, 140.53, 138.05, 136.83, 135.04, 134.83, 134.54, 129.45, 127.93, 127.85, 127.65, 125.60, 125.45, 83.79, 83.74, 78.11, 75.92, 51.95, 51.63, 24.94, 24.87, C-B signals not observed; HRMS (Q-TOF ES+)  $m/z$  calculated for  $\text{C}_{37}\text{H}_{44}\text{B}_2\text{O}_5$  (M – OMe) $^+$  589.3309; found, 589.3297.



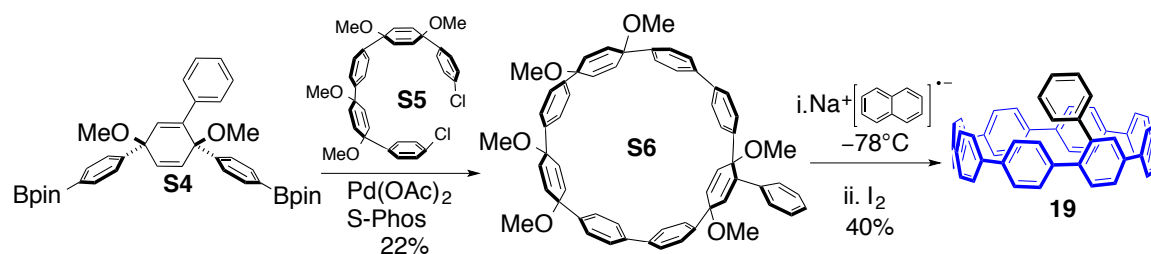

**Figure S2.** Synthetic route to mono-aryl [8]CPP **19**.

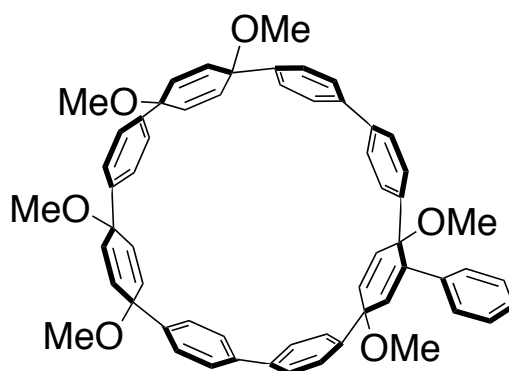

**Macrocycle S6.** A 100 mL schlenk flask was charged with a stirbar, dichloride **S5**<sup>4</sup> (92.8 mg, 0.161 mmol, 1 equiv.), diboronate **S4** (100 mg, 0.161 mmol, 1 equiv.),  $\text{Pd}(\text{OAc})_2$  (10.8 mg, 0.0481 mmol, 0.3 equiv), S-Phos (26.4 mg, 0.0644 mmol, 0.4 equiv.), and  $\text{Cs}_2\text{CO}_3$  (261.6 mg, 0.805 mmol, 5 equiv.), to which was added sparged ( $\text{N}_2$ , 1 hour) dioxane (54 mL) and sparged ( $\text{N}_2$ , 1 hour)  $\text{H}_2\text{O}$  (6 mL). The reaction mixture was sealed and placed into a preheated oil bath at  $80^\circ\text{C}$  and stirred for 16 hours. Upon completion the reaction mixture was cooled, diluted with dichloromethane (50 mL), filtered through celite, and placed in a separatory funnel containing  $\text{H}_2\text{O}$  (75 mL). The

<sup>4</sup> Dichloride **S5** was prepared as outlined in Li, P.; Sisto, T. J.; Darzi, E. R.; Jasti, R. *Org. Lett.* **2014**, *16*, 182-185

layers were separated, at which point the aqueous layer was washed with dichloromethane (3 X 25 mL). The organic layers were subsequently combined, washed with brine, dried over sodium sulfate, and evaporated under reduced pressure. The crude mixture was purified via silica gel chromatography (1:19 ethyl acetate:dichloromethane) to afford **S6** as a white solid (30 mg, 22%). IR (neat) 3028.85, 2982.23, 2933.25, 2896.86, 2822.76, 2246.29, 1491.15, 1448.94, 1397.35, 1174.43, 1077.54, 1016.70, 1005.88, 950.14, 908.69, 822.60, 729.84  $\text{cm}^{-1}$ ;  $^1\text{H}$  NMR (500 MHz,  $\text{CDCl}_3$ )  $\delta$  7.54-7.47 (overlap, 12H), 7.42 (d,  $J = 8.49$  Hz, 2H), 7.39-7.36 (m, 2H), 7.33 (d, 8.49 Hz, 2H), 7.27-7.24 (m, 2H), 7.21-7.18 (overlap, 3H), 7.11 (d,  $J = 8.49$  Hz, 2H), 6.75 (d,  $J = 2.24$  Hz, 1H), 6.27 (d,  $J = 10.01$  Hz, 1H), 6.23 (dd,  $J = 10.01, 2.24$  Hz, 1H), 6.17-6.02 (overlap, 8H), 3.52 (s, 3H), 3.48 (s, 3H), 3.47 (s, 3H), 3.41 (s, 3H), 3.40 (s, 3H), 3.20 (s, 3H);  $^{13}\text{C}$  NMR (500 MHz,  $\text{CDCl}_3$ )  $\delta$  143.33, 142.85, 142.82, 140.96, 140.20, 140.15, 139.85, 139.71, 139.52, 138.13, 137.56, 135.76, 133.95, 133.50, 133.40, 133.19, 133.11, 132.83, 132.37, 128.90, 127.95, 127.63, 127.50, 127.08, 126.84, 126.73, 126.62, 126.52, 126.26 (3), 126.25 (3), 78.95, 76.36, 74.61, 74.56, 74.08, 74.06, 52.10, 52.03, 51.82, 51.72; MALDI-TOF  $m/z$  calculated for  $\text{C}_{59}\text{H}_{52}\text{O}_5$  ( $\text{M} - \text{OMe}$ ) $^+$  840.3; found, 840.3.

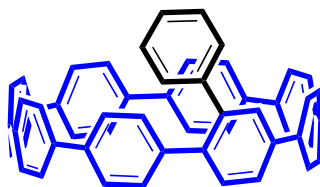

**Mono-aryl [8]CPP 19.** A solution of sodium naphthalenide was freshly prepared by charging a dry 100 mL roundbottom with a dry stirbar, THF (60 mL), and sodium metal (690 mg, 30 mmol, 1 eq.). The solution was stirred for 5 minutes at room temperature, at

which point naphthalene (4.23 g, 33 mmol, 1.1 eq.) was added, immediately resulting in a dark green solution. The mixture was stirred for 3 hours at room temperature, at which point it was utilized.

While the sodium naphthalenide was being prepared, a dry 25 mL roundbottom flask was charged with a dry stirbar, macrocycle **S6** (100 mg, 0.144 mmol, 1 eq.), and THF (10 mL). This reaction mixture was cooled to  $-78\text{ }^{\circ}\text{C}$ , at which point sodium naphthalenide (3 mL, 1.5 mmol, 10 eq.) was introduced dropwise, immediately resulting in a vivid purple reaction mixture that became dark green upon completion of introduction. The reaction mixture was stirred for 30 minutes at  $-78\text{ }^{\circ}\text{C}$ , at which point the reaction was quenched with a solution of iodine in dry THF (titrated into reaction mixture until a red color persists). The reaction mixture was warmed to room temperature and transferred to a separatory funnel, where it was diluted with dichloromethane (50 mL) and a solution of saturated sodium thiosulfate (enough to quench the excess iodine). The layers were separated, at which point the aqueous layer was extracted with dichloromethane (3 X 20 mL). The organic layers were combined, washed with brine, and dried over sodium sulfate. The organic layer was then evaporated under reduced pressure to afford a crude yellow solid, which was crudely purified by silica column chromatography (0:10 to 50:50 dichloromethane:hexanes). This material was then crystallized by supersaturation (sonication) in dichloromethane followed by careful introduction of a top layer of hexanes (32 mg, 40%). IR (neat) 3075.80, 3022.13, 2246.83, 1898.87, 1584.53, 1481.06, 1443.53, 1390.91, 906.39, 812.15, 727.01  $\text{cm}^{-1}$ ;  $^1\text{H}$  NMR (500 MHz,  $\text{CDCl}_3$ )  $\delta$  7.92 (d,  $J$  = 1.82 Hz, 1H), 7.74-7.72 (overlap, 2H) 7.62-7.55 (overlap, 6H), 7.53-7.46 (overlap,

16H), 7.44-7.32 (overlap, 6H), 7.25 (s broad, 1H), 7.17-7.11 (overlap broad, 3H), 7.07 (d,  $J = 8.50$  Hz, 1H);  $^{13}\text{C}$  NMR (500 MHz,  $\text{CDCl}_3$ )  $\delta$  141.41, 140.11, 139.68, 138.24, 138.22, 138.09, 137.97, 137.77, 137.75, 137.74, 137.72, 137.67, 137.65, 137.61, 137.57, 137.50, 137.43, 134.68, 129.80, 129.50, 128.78, 127.51 (12), 127.48, 127.42, 127.36, 127.29, 125.25; MALDI-TOF  $m/z$  calculated for  $\text{C}_{54}\text{H}_{36}$  (M) $^+$  684.88; found, 685.3.

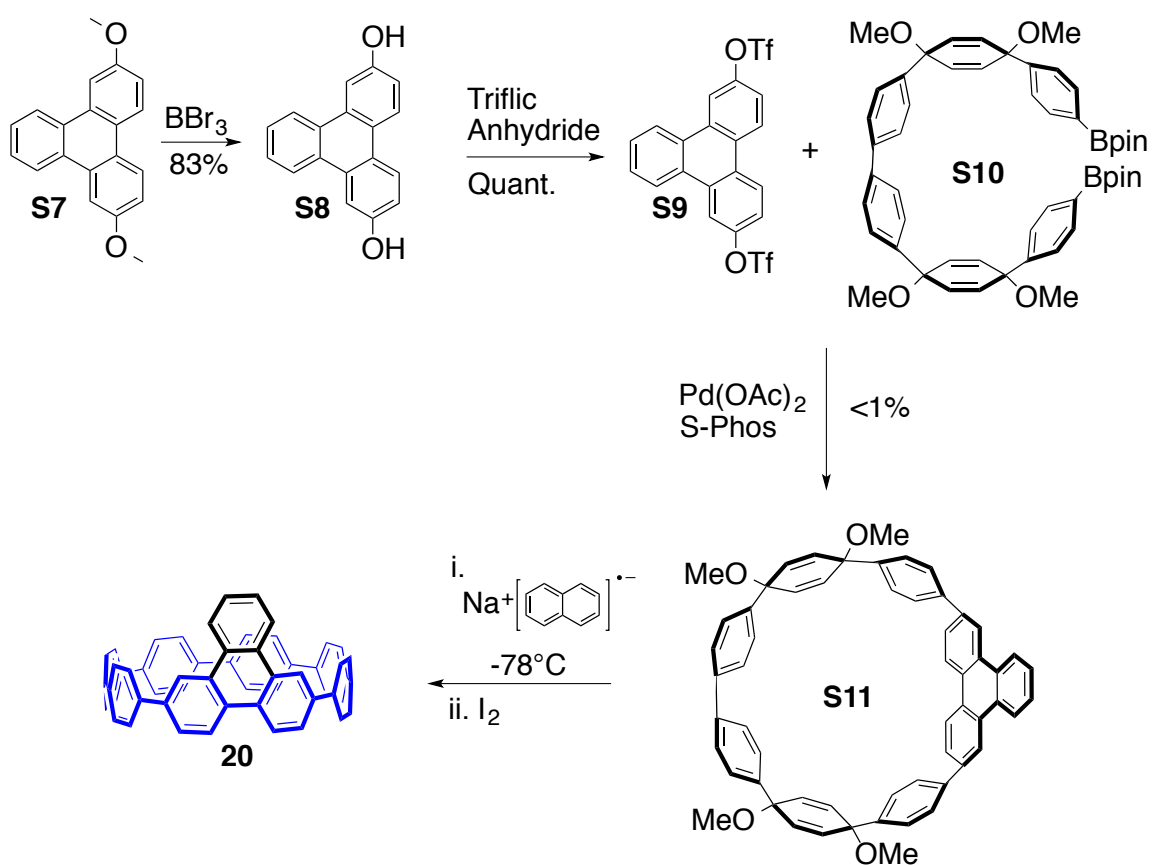

**Figure S3:** Synthetic route to authentic sample **20**.

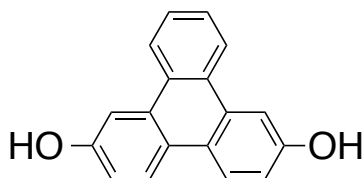

**Dihydroxytriphenylene S8: CAUTION:**  $\text{BBr}_3$  liberates  $\text{HBr}$  gas upon quench. Be aware that a large volume of gas is liberated quickly from a small volume of liquid. Use appropriately sized glassware, and vent the liberated gas through glass adaptors to a pH basic bubbler quench.

To a 100 mL dry roundbottom flask (advise using a larger multi-necked flask) charged with a dry stirbar, was added literature known dimethoxytriphenylene<sup>5</sup> **S7** (1 gram, 3.47 mmol, 1 eq.). To the reaction flask, 50 mL of dry dichloromethane was added. The reaction mixture was cooled to 0 °C. Once cooled, boron tribromide (13.03 g, 4.93 mL, 52.02 mmol, 15 eq.) was added dropwise. The reaction mixture was stirred for 4 hours, at which point water was added extremely slowly (CAUTION). The reaction mixture was subsequently placed into a separatory funnel and diluted with water and ethyl acetate (150 mL of each). The organic layer was separated, and the aqueous layer was extracted with ethyl acetate (3 X 50 mL). The organic layers were combined, washed with brine, and dried over sodium sulfate. Once dry, the organic layer was evaporated under reduced pressure to afford a solid, which was washed with chloroform to afford a white solid (750 mg, 83%). IR (neat): 3263.31, 1613.16, 1584.97, 1502.47, 1428.99, 1363.86, 1338.26, 1286.34, 1242.02, 1188.40, 901.57869.14, 856.58, 848.74, 804.21, 759.77 cm<sup>-1</sup>; <sup>1</sup>H NMR (500 MHz, DMSO-d<sub>6</sub>) δ 9.73 (s, 2H), 8.52 (dd, AAB', *J* = 6.92, 3.65 Hz, 2H), 8.44 (d, *J* = 8.88 Hz, 2H), 7.95 (d, *J* = 2.47 Hz, 2H), 7.64 (dd, AAB', *J* = 6.92, 3.65 Hz, 2H), 7.12 (dd, *J* = 8.88, 2.47 Hz, 2H); <sup>13</sup>C NMR (600 MHz, DMSO-d<sub>6</sub>) δ 156.45, 129.82, 129.70, 127.79, 124.87, 123.85, 122.88, 117.64, 108.05; HRMS (Q-TOF ES+) *m/z* calculated for C<sub>18</sub>H<sub>12</sub>O<sub>2</sub> (M)<sup>+</sup> 260.08373; found 260.08365.

---

<sup>5</sup> King, B. T.; Kroulik, J.; Robertson, C. R.; Rempala, P.; Hilton, C. L.; Korinek, J. D.; Gortari, L. M. *J. Org. Chem.* **2007**, *72*, 2279-2288

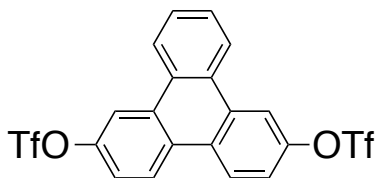

**Di-triflatetriphenylene S9:** A 100 mL dry roundbottom flask was charged with a dry stirbar, at which point **S8** (500 mg, 1.92 mmol, 1 eq.) was added. To the vessel was added dichloromethane (15 mL) and distilled pyridine (15 mL), at which point the reaction mixture was cooled to 0 °C. Once cool, triflic anhydride (2.166 g, 1.3 mL, 7.68 mmol, 4 eq) was added dropwise. The reaction was allowed to warm to room temperature and stirred for one hour. The reaction was then quenched dropwise with H<sub>2</sub>O. Once quenched, the reaction mixture was transferred to a separatory funnel and diluted with ethyl acetate (75 mL) and H<sub>2</sub>O (75 mL). The layers were separated, and the aqueous layer was extracted with ethyl acetate (3 X 50 mL). The organic layers were combined, washed with brine, and dried over sodium sulfate. Once dry, the organic layer was evaporated under reduced pressure to afford a solid. This solid was eluted with dichloromethane through a pad of silica to afford a white solid (quantitative). IR (neat) 1615.33, 1582.73, 1497.63, 1437.09, 1417.82, 1243.57, 1206.07, 1137.92, 1030.45, 926.18, 869.48, 828.53, 805.08, 758.67, 650.95, 624.93, 596.05, 574.70; <sup>1</sup>H NMR (500 MHz, DMSO-d<sub>6</sub>) δ 8.63 (d, *J* = 9.10 Hz, 2H), 8.51 (dd, ABB' *J* = 6.78, 3.53 Hz, 2H), 8.47 (d, *J* = 2.46 Hz, 2H), 7.77 (dd, AAB', *J* = 6.78, 3.53 Hz, 2H), 7.58 (dd, *J* = 9.10, 2.46 Hz, 2H); <sup>13</sup>C NMR (150 MHz, DMSO-d<sub>6</sub>) δ 149.11, 131.79, 128.93, 128.85, 128.24, 126.00, 123.61, 120.39, 118.85 (q, *J* = 321 Hz, 4<sup>th</sup> peak overlapped), 115.96; HRMS (Q-TOF ES+) *m/z* calculated for C<sub>20</sub>H<sub>10</sub>O<sub>6</sub>S<sub>2</sub>F<sub>6</sub>(M)<sup>+</sup> 523.98229; found 523.98089.

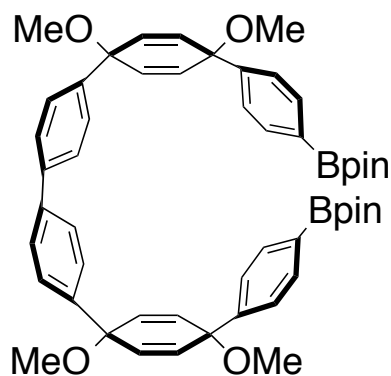

**6-Ring Diboronate S10:** A dry 25 mL flask was charged with a large (reaction is heterogeneous) dry stirbar, previously reported 6-ring dichloride<sup>6</sup> (1 g, 1.535 mmol, 1 eq.), bis(pinacolato)diboron (2.34 g, 9.21 mmol, 6 eq.), Pd(OAc)<sub>2</sub> (72.5 mg, 0.324 mmol, 0.21 eq.), S-Phos (251.7 mg, 0.614 mmol, 0.4 eq.), and oven dried, ground K<sub>3</sub>PO<sub>4</sub> (1.953 g, 9.21 mmol, 6 eq.). The flask was evacuated and backfilled with N<sub>2</sub> (6X). Degassed DMF (7 mL; sparged with N<sub>2</sub> separately) was added to the reaction mixture, which was subsequently heated to 60 °C. The heterogeneous mixture was allowed to stir for 16 hours, at which point it was cooled. Once cooled, the reaction mixture was dissolved in dichloromethane, passed through a pad of celite, and concentrated under reduced pressure to afford a solid. This solid was washed with hexanes to remove the excess bis(pinacolato)diboron and afford clean product (850 mg, 66%). IR (neat) 2978.16, 2935.75, 2822.47, 1609.60, 1491.38, 1398.22, 1360.73, 1320.34, 1271.92, 1144.77, 1087.09, 1018.68, 950.59, 858.91, 823.19, 760.67, 739.31, 659.23, 539.99; <sup>1</sup>H NMR (600 MHz, CDCl<sub>3</sub>) δ 7.83 (d, *J* = 8.66 Hz, 4H), 7.58 (d, *J* = 8.66 Hz, 4H), 7.51 (d, *J* = 8.66 Hz,

<sup>6</sup> Sisto, T. J.; Golder, M. R.; Hirst, E. S.; Jasti, R. *J. Am. Chem. Soc.* **2011**, *133*, 15800-15802



4H), 7.49 (d,  $J = 8.66$  Hz, 4H), 6.20 (d,  $J = 10.37$  Hz, 4H), 6.16 (d,  $J = 10.37$  Hz, 4H), 3.50 (s, 6H), 3.49 (s, 6H), 1.38 (s, 24H);  $^{13}\text{C}$  NMR (150 MHz, DMSO- $d_6$ )  $\delta$  146.48, 142.48, 140.07, 134.98, 133.41, 133.32, 127.17, 126.46, 125.38, 83.79, 75.00, 74.75, 52.04, 52.01, 24.90; HRMS (Q-TOF ES+)  $m/z$  calculated for  $\text{C}_{52}\text{H}_{60}\text{B}_2\text{O}_8\text{Na}$  ( $\text{M} + \text{Na}$ ) $^+$  857.4372; found 857.4387.

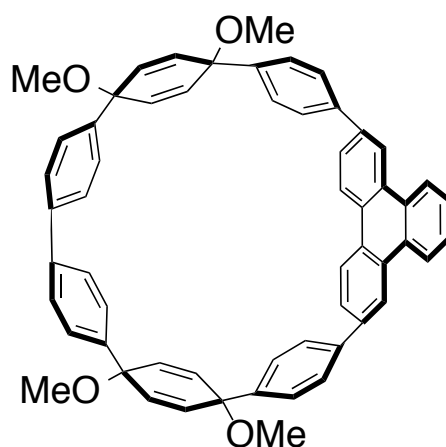

**Triphenylene [8]macrocyclic S11:** A 100 mL schlenck flask was charged with a stirbar, ditriflate **S9** (73.4 mg, 0.14 mmol, 1.2 equiv.), diboronate **S10** (100 mg, 0.12 mmol, 1 equiv.),  $\text{Pd}(\text{OAc})_2$  (6 mg, 0.024 mmol, 0.21 equiv.), S-Phos (20 mg, 0.048 mmol, 0.4 equiv.), and  $\text{K}_3\text{PO}_4$  (78.2 mg, 0.24 mmol, 2 equiv.), to which was added sparged ( $\text{N}_2$ , 1 hour) DMF (54 mL) and sparged ( $\text{N}_2$ , 1 hour)  $\text{H}_2\text{O}$  (6 mL). The reaction mixture was sealed and placed into a preheated oil bath at 120  $^\circ\text{C}$  and stirred for 16 hours. Upon completion the reaction mixture was cooled, diluted with dichloromethane (50 mL), filtered through celite, and placed in a separatory funnel containing  $\text{H}_2\text{O}$  (75 mL). The layers were separated, at which point the aqueous layer was extracted with dichloromethane (3 X 25 mL). The organic layers were subsequently combined, washed

with brine, dried over sodium sulfate, and evaporated under reduced pressure. The crude mixture was purified via silica gel chromatography (1:19 ethyl acetate:dichloromethane), followed by preparatory TLC (1:19 ethyl acetate:dichloromethane) to afford **S11** as a white solid (<1 mg, 1%). IR (neat) 3028.00, 2933.39, 2821.27, 2245.57, 1604.33, 1489.91, 1441.51, 1395.47, 1227.19, 1173.88, 1080.41, 1026.21, 1016.94, 1005.27, 950.19, 907.38, 842.08, 821.41, 804.97, 762.52, 730.63, 666.08  $\text{cm}^{-1}$ ; NMR (500 MHz,  $\text{CDCl}_3$ )  $\delta$  8.41 (d,  $J = 8.74$  Hz, 2H), 8.38 (dd, ABB',  $J = 7.11, 3.90$  Hz, 2H), 8.21 (d,  $J = 1.60$  Hz, 2H), 7.76 (dd,  $J = 8.74, 1.60$  Hz, 2H), 7.67 (dd, ABB',  $J = 7.11, 3.90$  Hz, 2H), 7.45 (d,  $J = 8.65$  Hz, 4H), 7.42 (d,  $J = 8.65$  Hz, 4H), 7.17 (d,  $J = 8.41$  Hz, 4H), 7.06 (d,  $J = 8.41$  Hz, 4H), 6.24 (d,  $J = 10.52$  Hz, 4H), 5.98-5.92 (overlap, 4H), 3.45 (s, 6H), 3.38 (s, 6H).  $^{13}\text{C}$  NMR of acceptable signal to noise was unobtainable overnight in a shigemi tube due to the extremely low quantity of sample obtained. However, the compound is confirmed through HRMS, and subsequent transformations of this compound are characterized. HRMS (Q-TOF ES+)  $m/z$  calculated for  $\text{C}_{58}\text{H}_{46}\text{O}_4\text{Na}$  ( $\text{M}+\text{Na}$ ) $^+$  829.3294; found 829.3303.

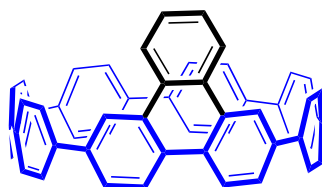

**Authentic Sample 20:** A solution of sodium naphthalenide was freshly prepared by charging a dry 100 mL roundbottom with a dry stirbar, THF (60 mL), and sodium metal (690 mg, 30 mmol, 1 eq.). The solution was stirred for 5 minutes at room temperature, at which point naphthalene (4.23 g, 33 mmol, 1.1 eq.) was added, immediately resulting in a

dark green solution. The mixture was stirred for 3 hours at room temperature, at which point it was utilized.

While the sodium naphthalenide was being prepared, a dry 5 mL roundbottom flask was charged with a dry stirbar, macrocycle **S11** (<1 mg), and THF (3 mL). This reaction mixture was cooled to  $-78\text{ }^{\circ}\text{C}$ , at which point sodium naphthalenide (1 mL, 0.5 mmol) was introduced dropwise, immediately resulting in a pink reaction mixture that became dark green upon completion of introduction. The reaction mixture was stirred for 30 minutes at  $-78\text{ }^{\circ}\text{C}$ , at which point the reaction was quenched with a solution of iodine in dry THF (titrated into reaction mixture until a red color persists). The reaction mixture was warmed to room temperature and transferred to a separatory funnel, where it was diluted with dichloromethane (10 mL) and a solution of saturated sodium thiosulfate (enough to quench the excess iodine). The layers were separated, at which point the aqueous layer was extracted with dichloromethane (3 X 10 mL). The organic layers were combined, washed with brine, and dried over sodium sulfate. The organic layer was then evaporated under reduced pressure to afford a crude yellow solid, which was purified by silica column chromatography (0:10 to 50:50 dichloromethane:hexanes) to afford a yellow solid with an extremely distinct green fluorescence (<1 mg). IR (neat) 2920.33, 2850.22, 812.70, 731.07; NMR (500 MHz,  $\text{CDCl}_3$ )  $\delta$  8.30 (dd, ABB',  $J = 7.16, 3.90$  Hz, 2H), 8.23 (d,  $J = 8.95$  Hz, 2H), 8.18 (d,  $J = 1.80$  Hz, 2H), 7.86 (dd,  $J = 8.95, 1.80$  Hz, 2H), 7.65 (dd, ABB',  $J = 7.16, 3.90$  Hz, 2H), 7.62 (d,  $J = 8.52$  Hz, 4H), 7.48-7.40 (overlap, 14H), 7.21-7.08 (broad, 6H);  $^{13}\text{C}$  NMR of acceptable signal to noise was unobtainable

overnight in a shigemi tube due to the extremely low quantity of sample obtained.

MALDI-TOF  $m/z$  calculated for  $C_{548}H_{34}(M)^+$  682.27; found 682.03.

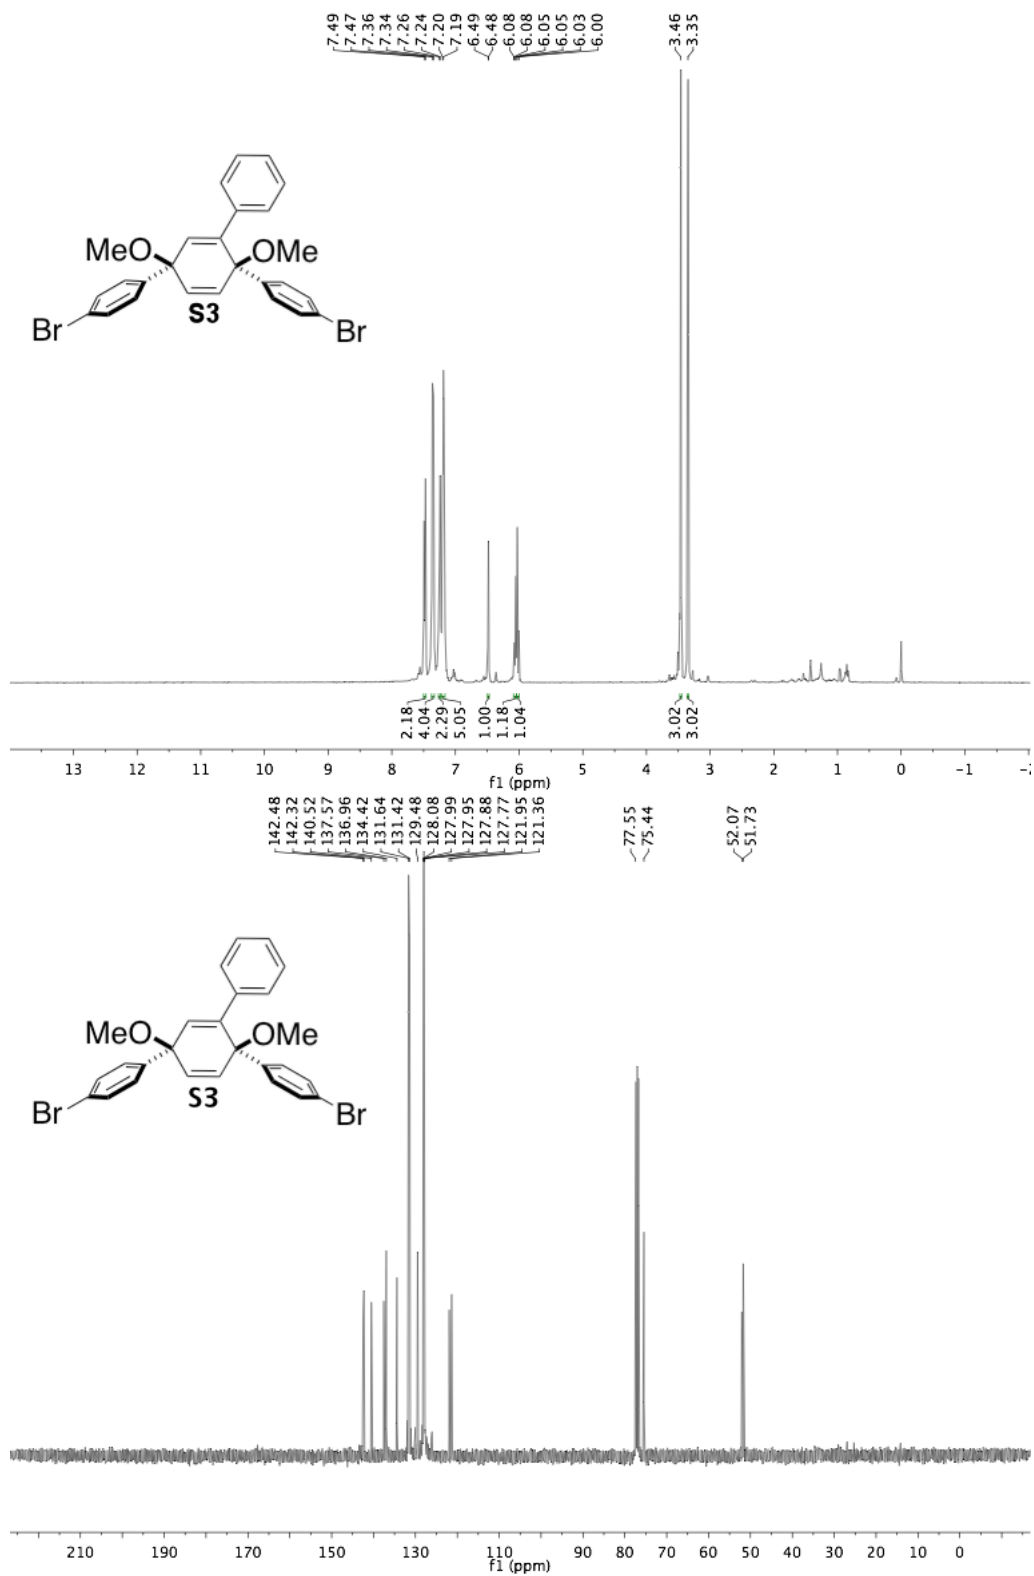

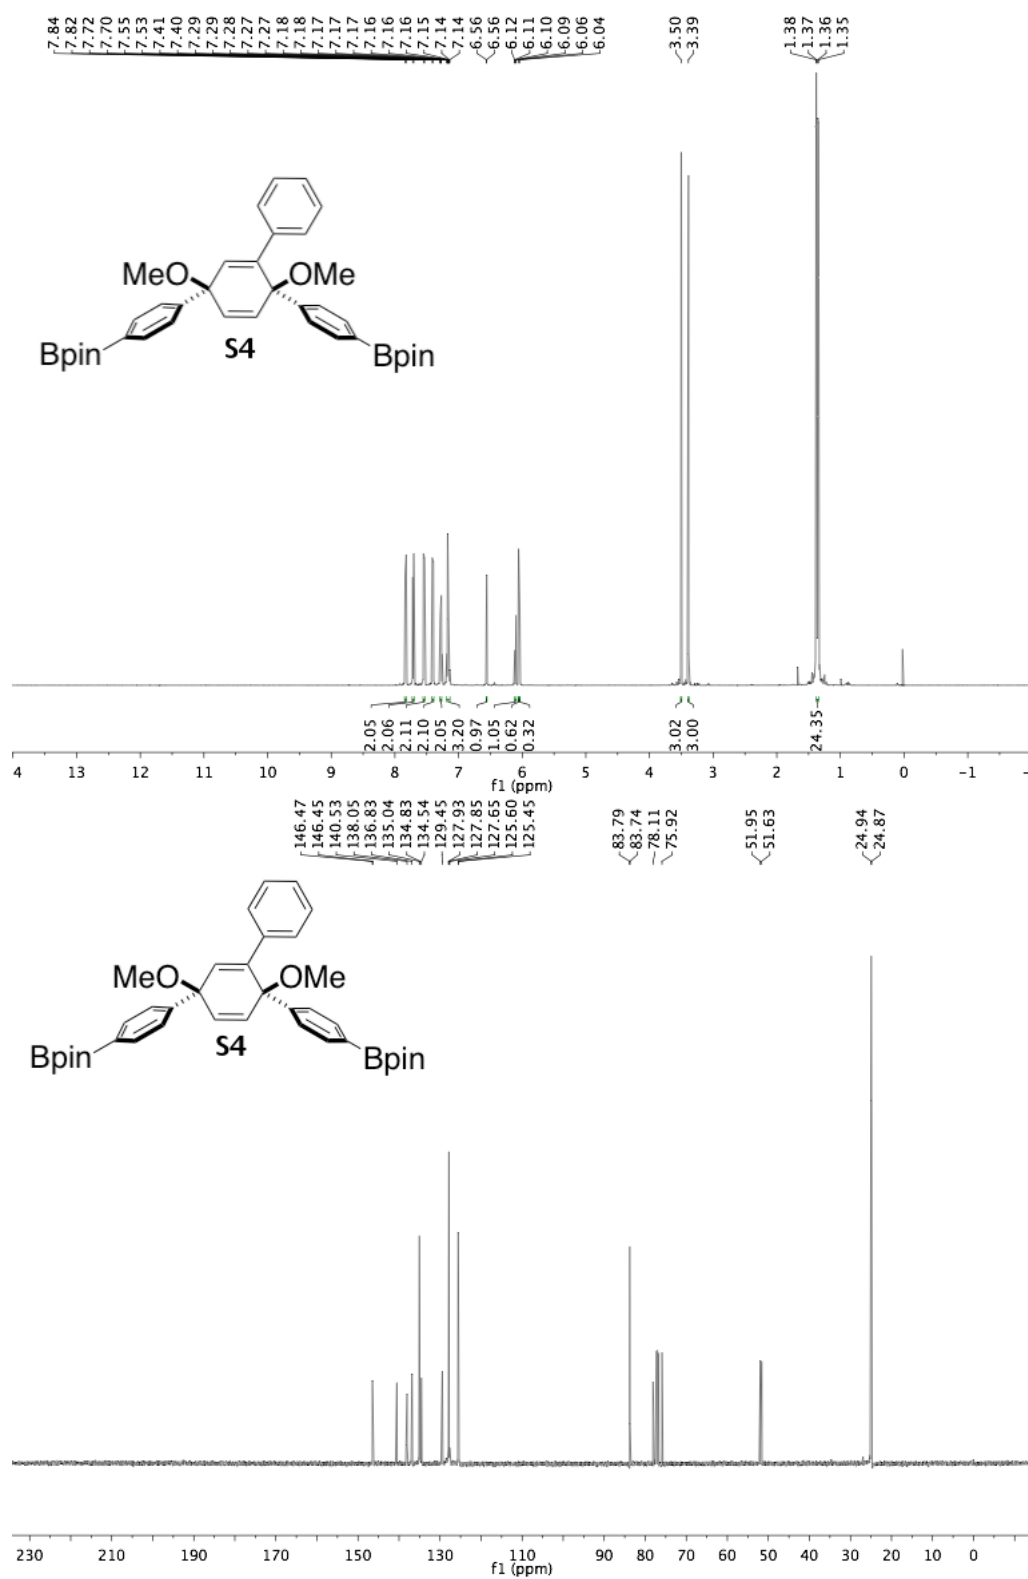

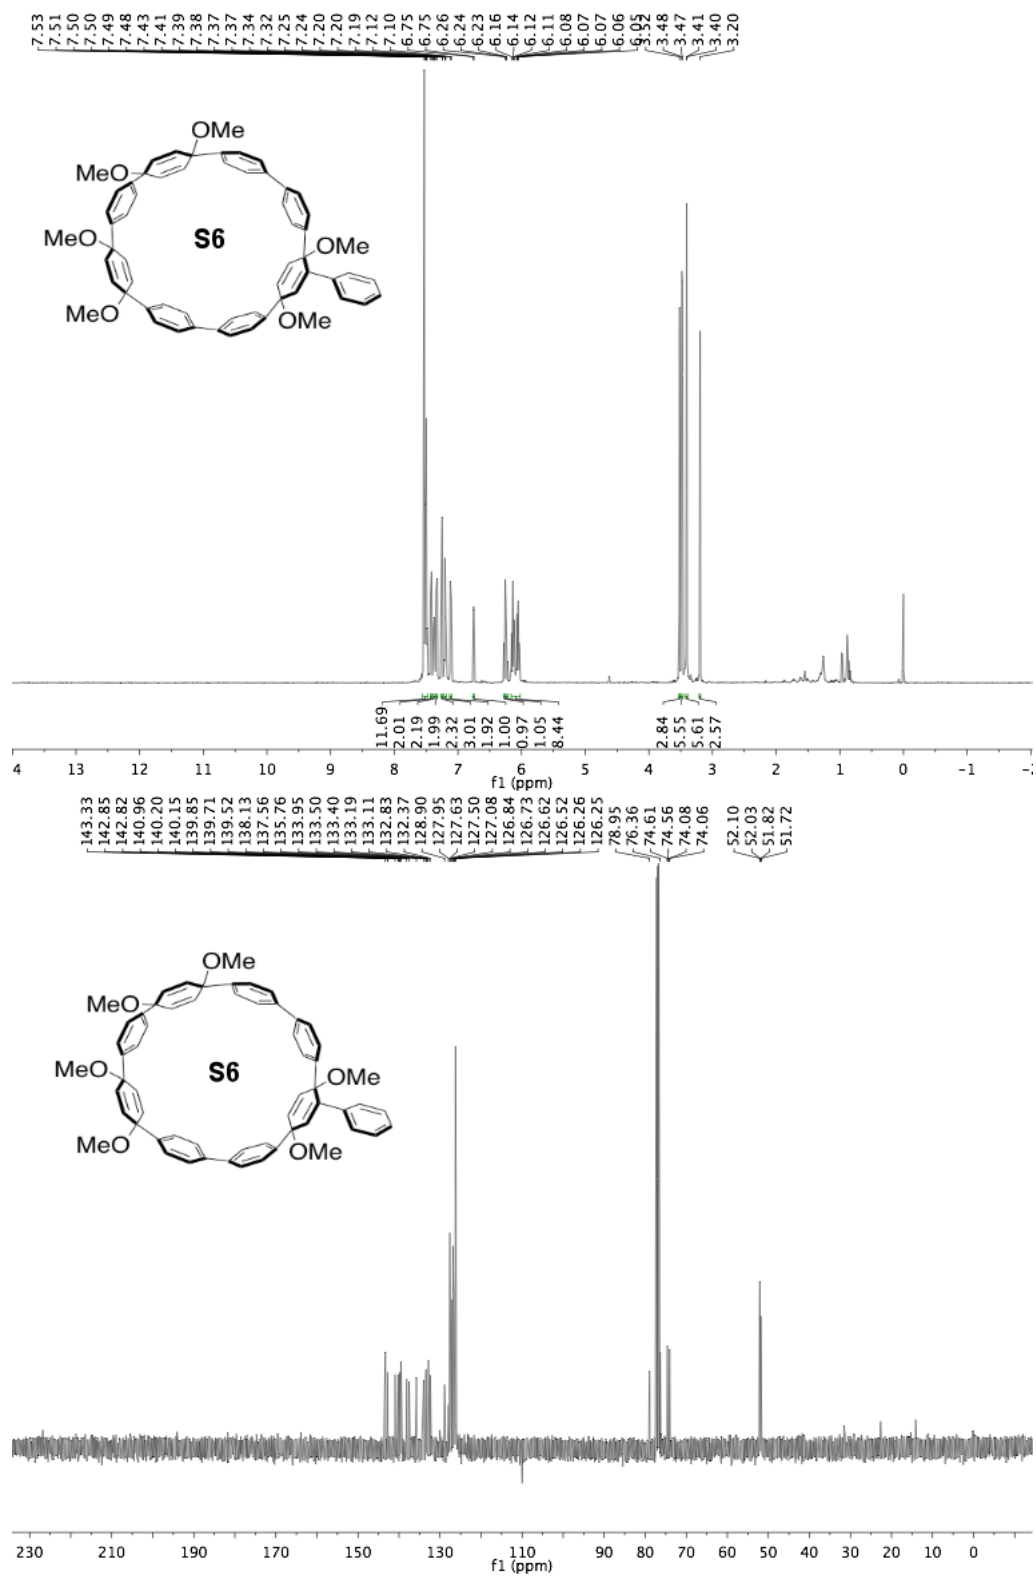

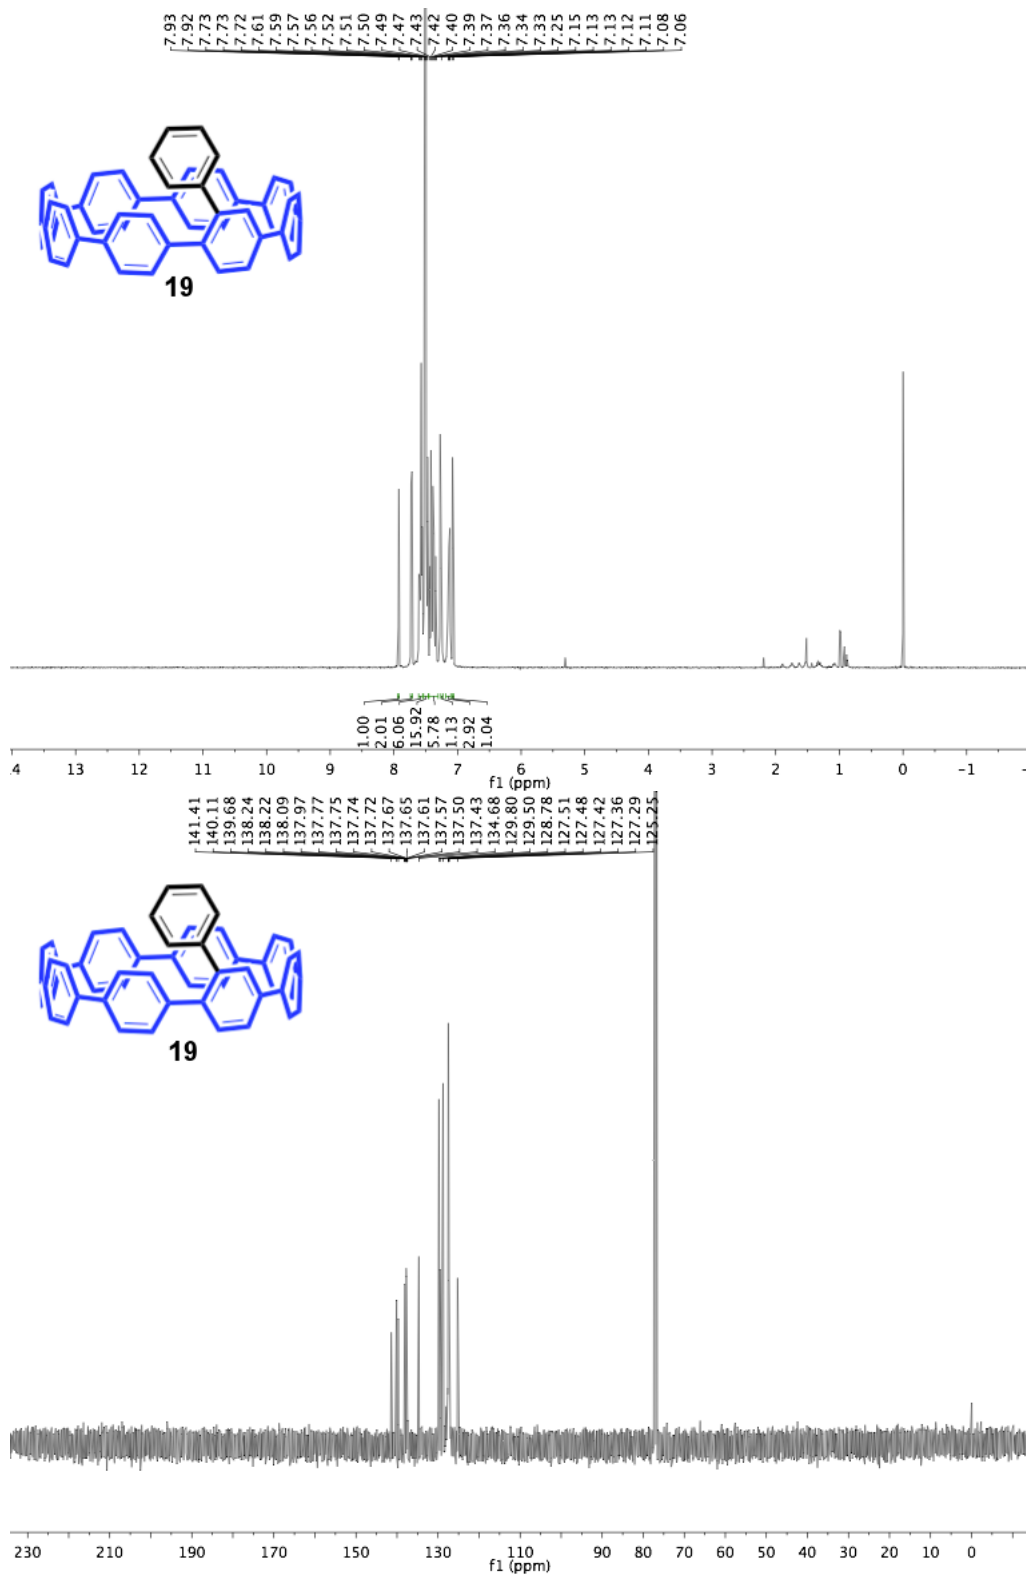



Voyager Spec #1[BP = 685.2, 3981]

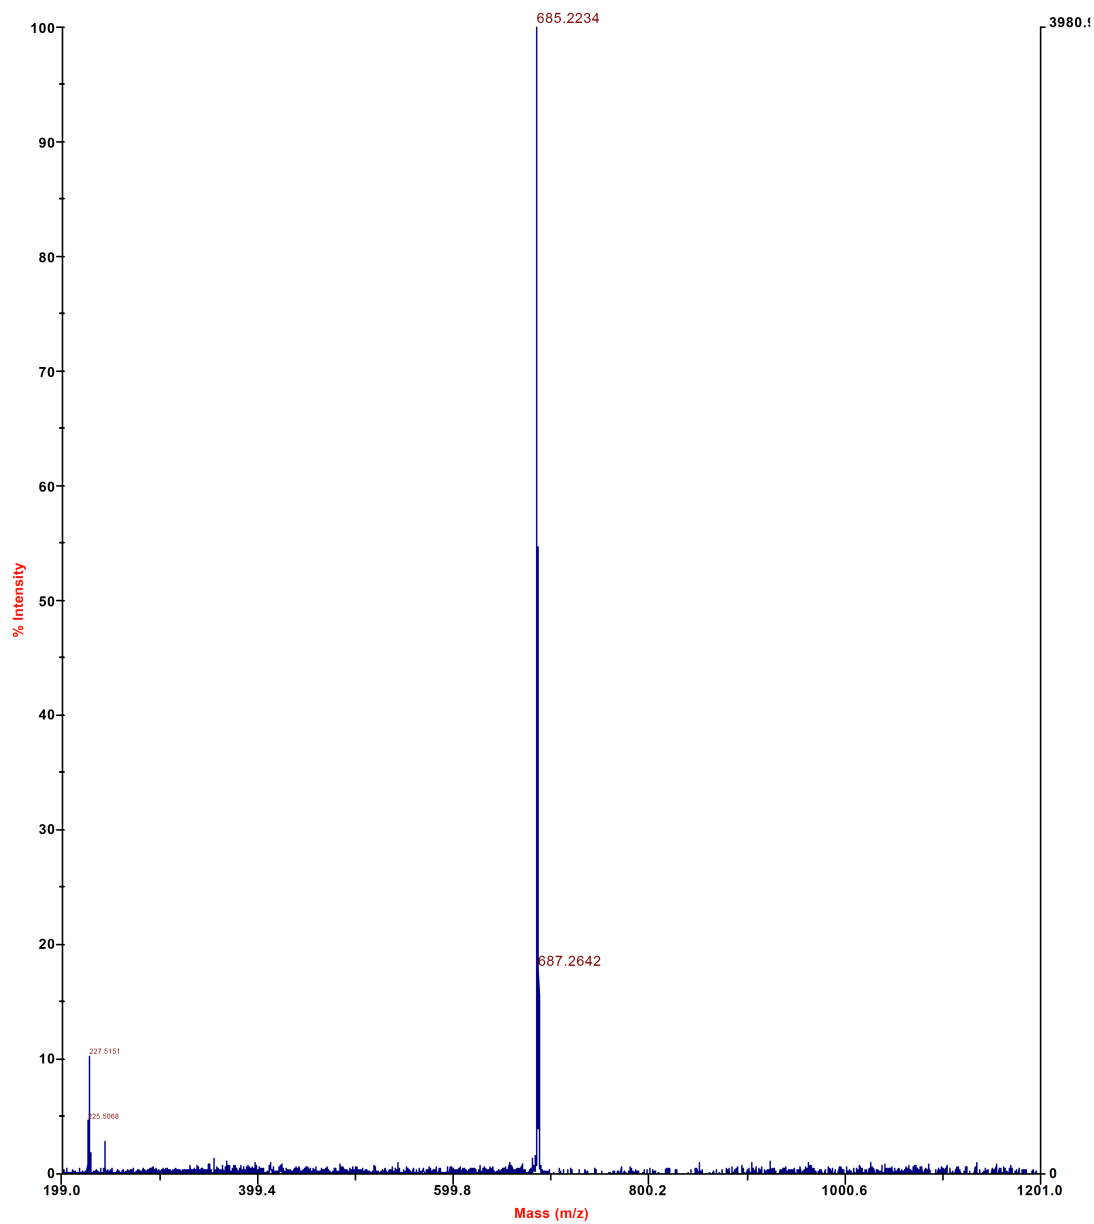

C:\...MonoAryl CPP\_0001.dat  
Acquired: 19:06:00, January 29, 2014

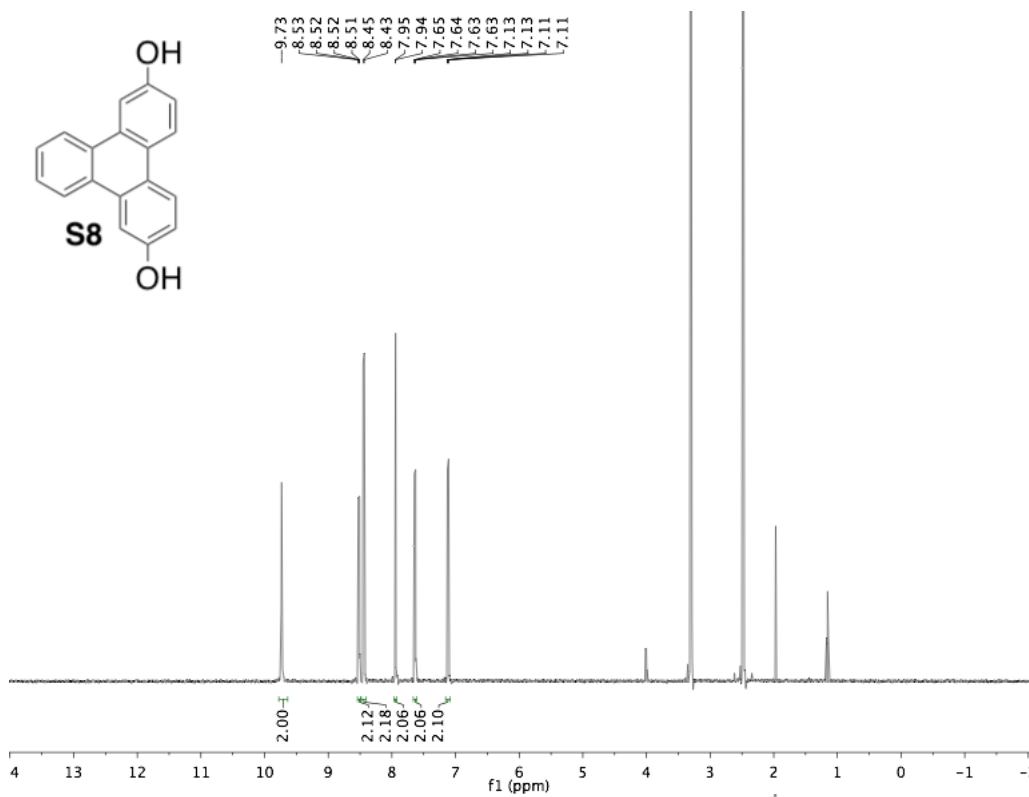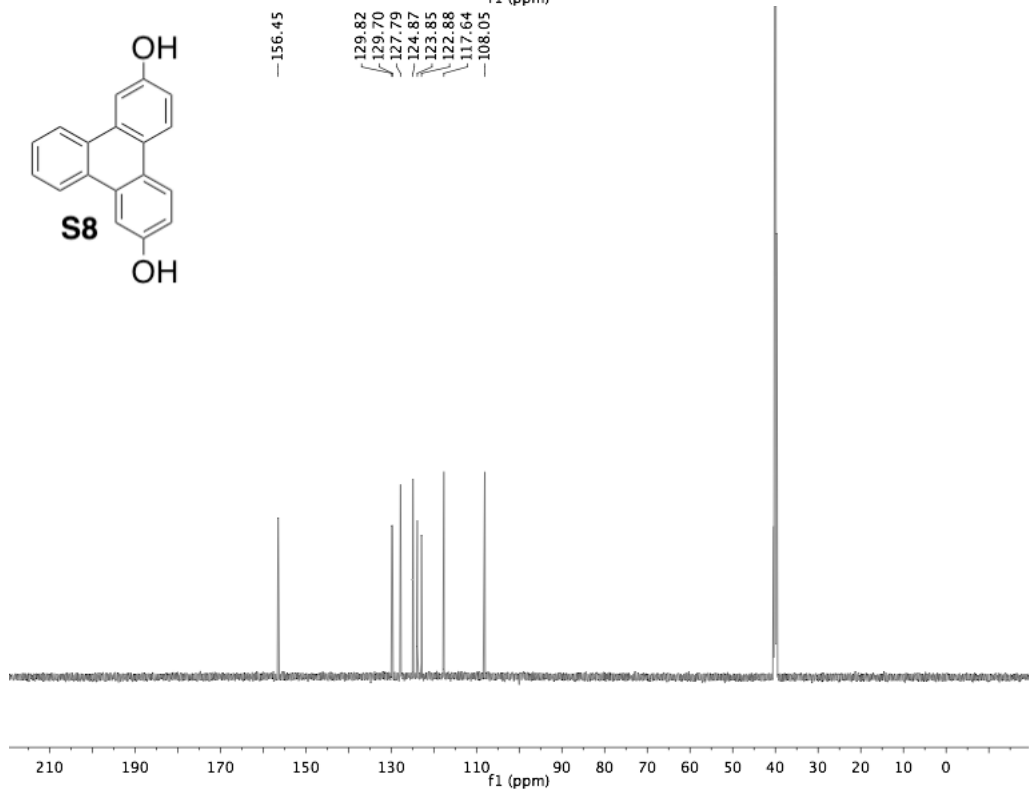

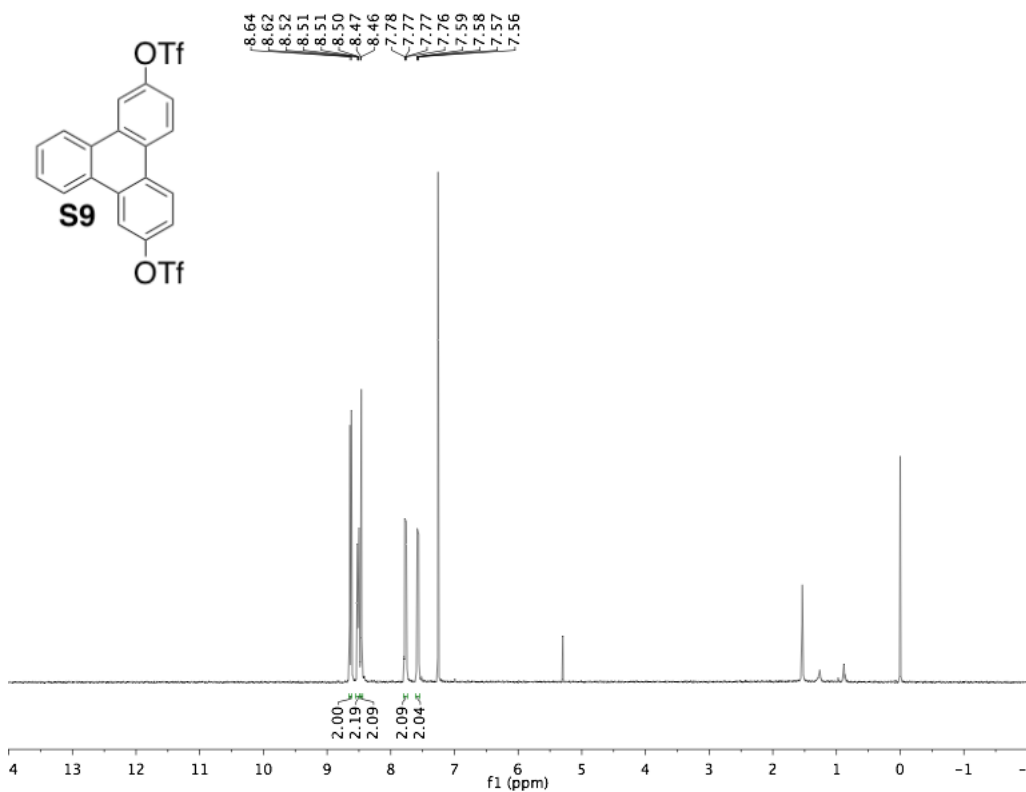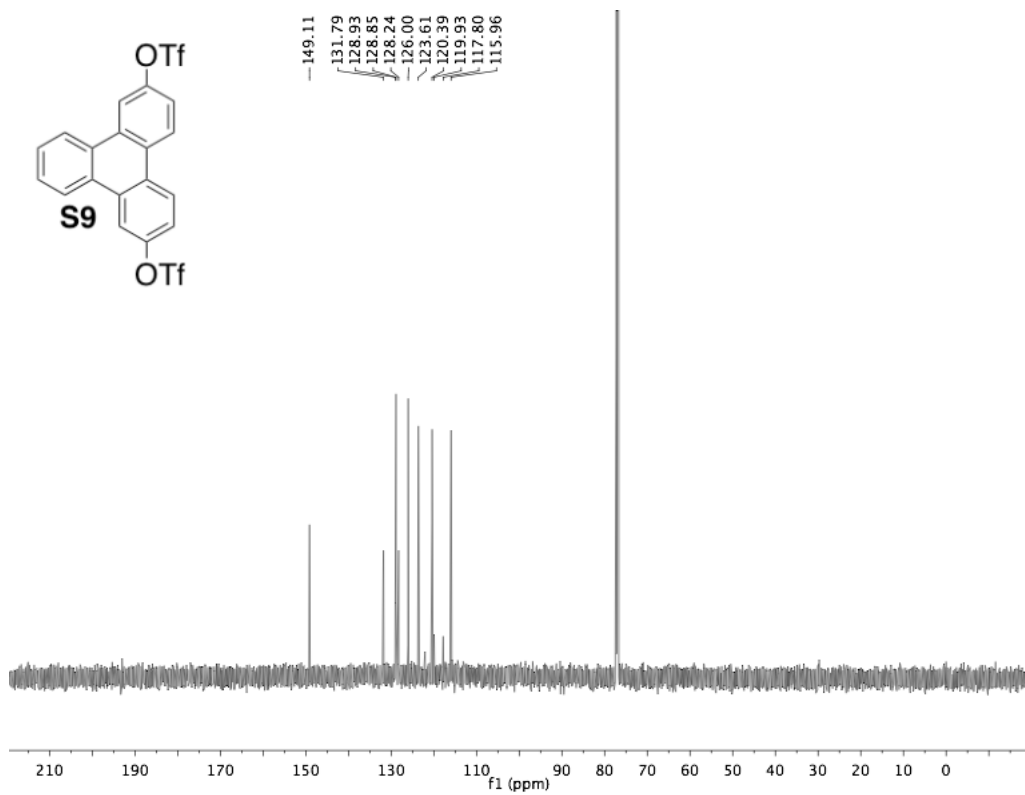

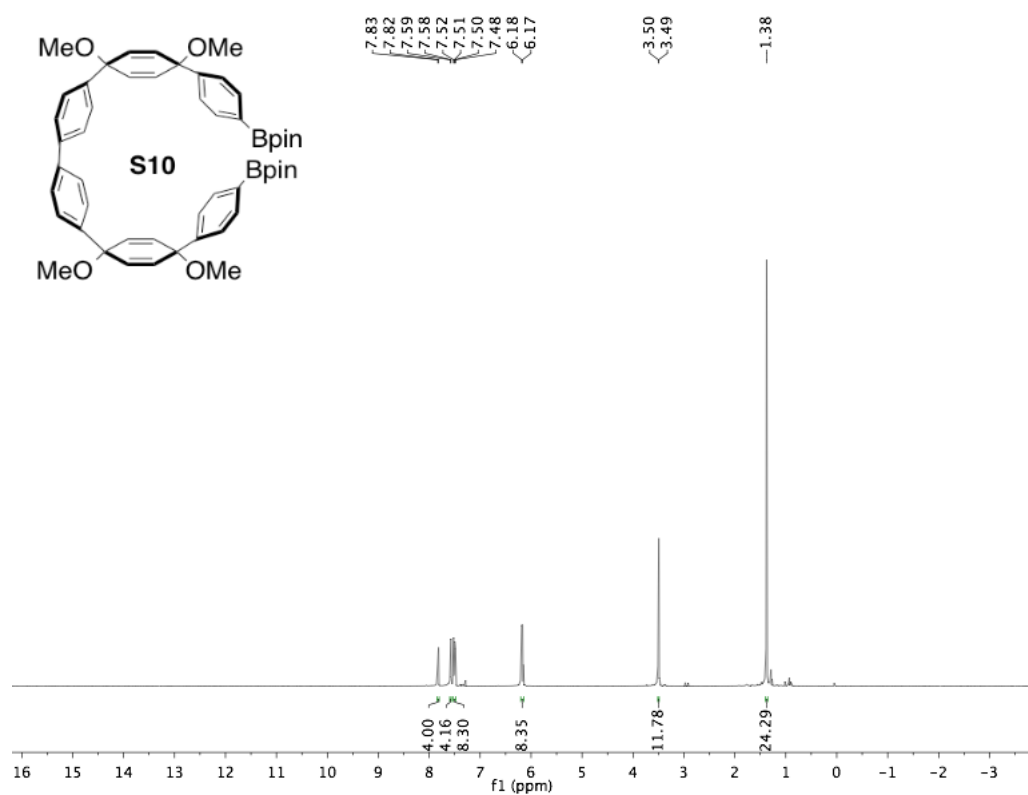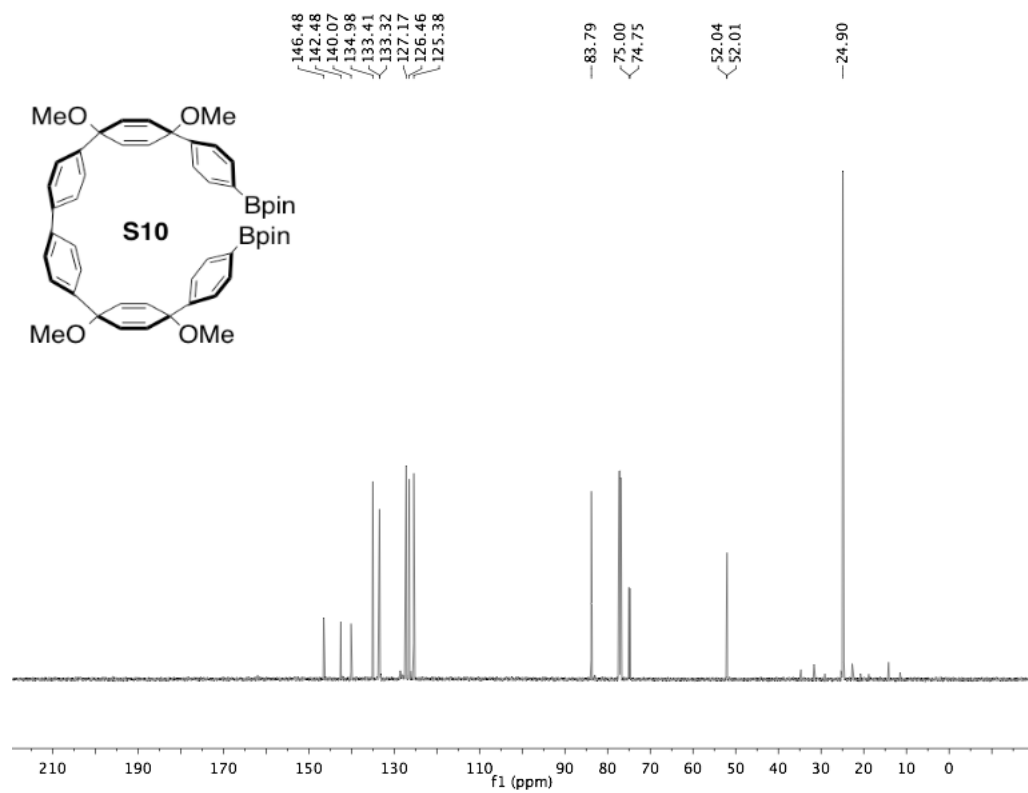

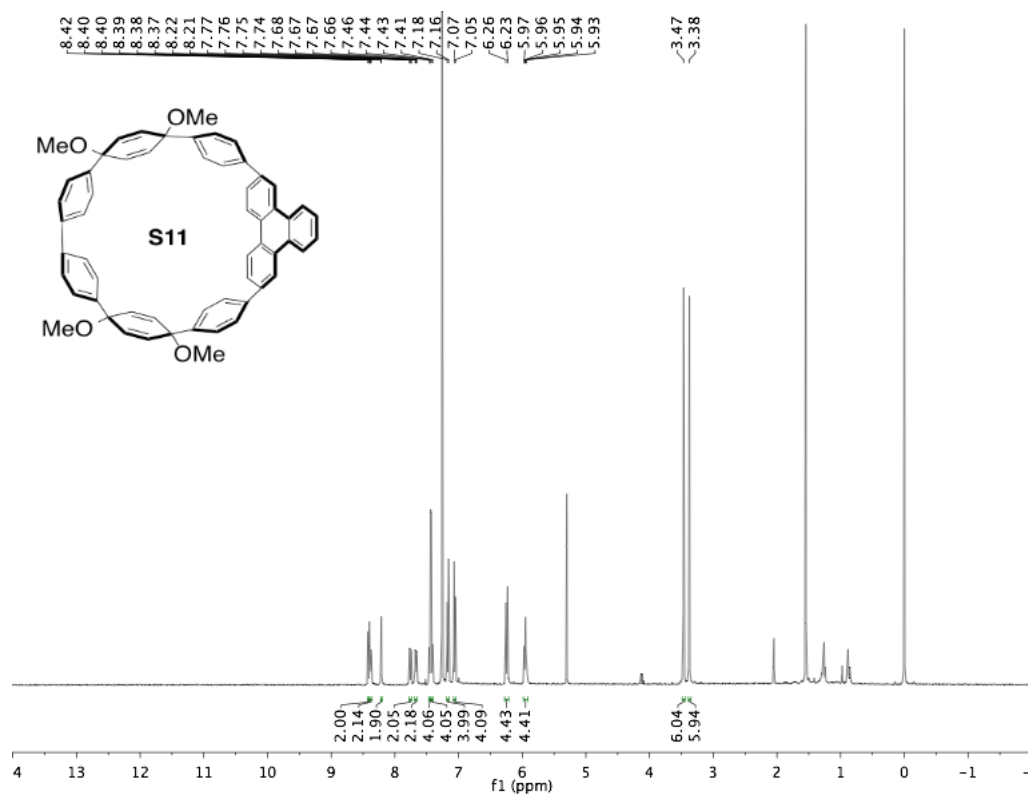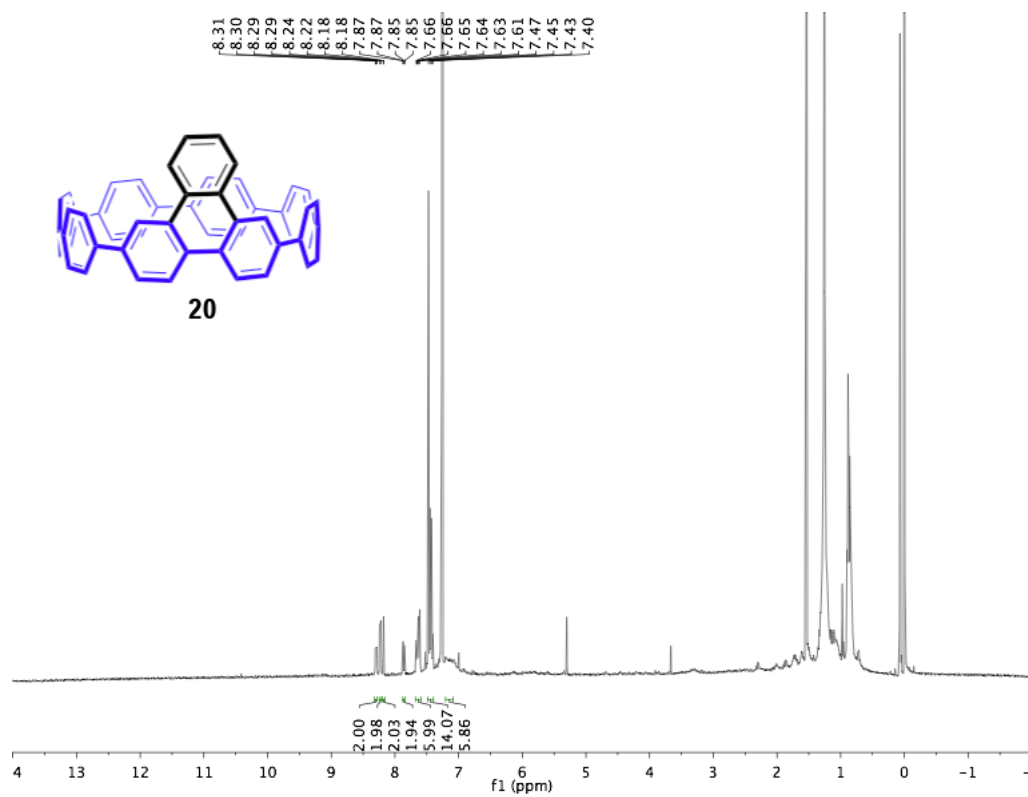

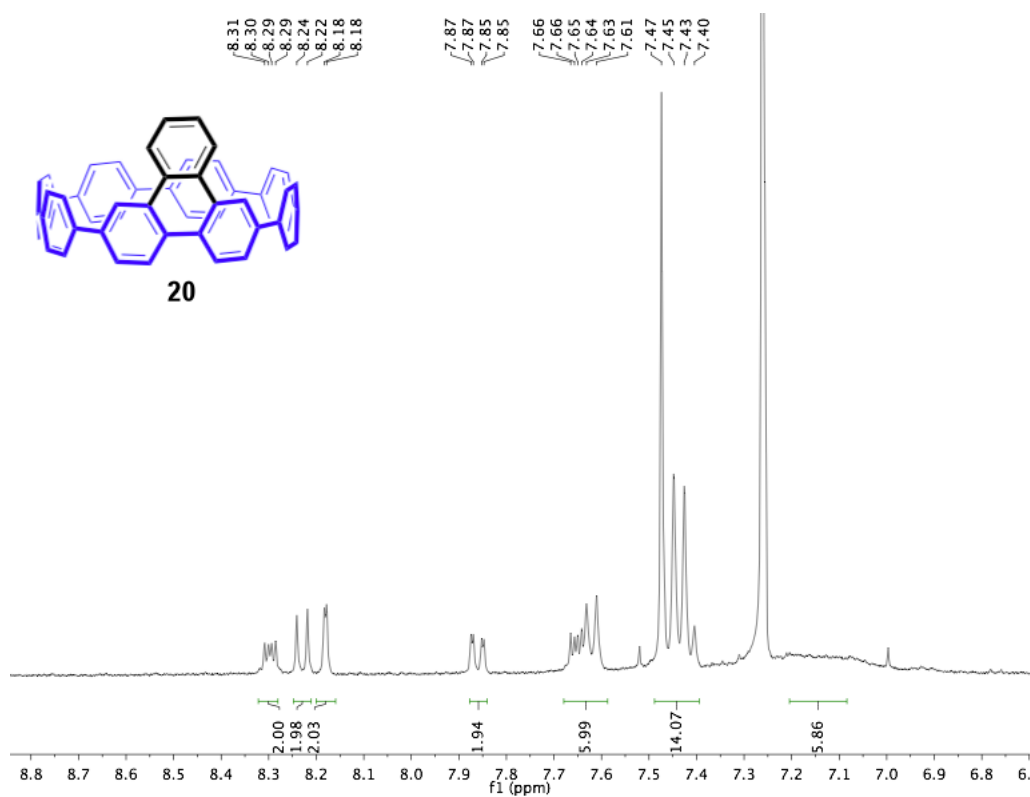

TOF/TOF™ Reflector Spec #1[BP = 682.1, 984]

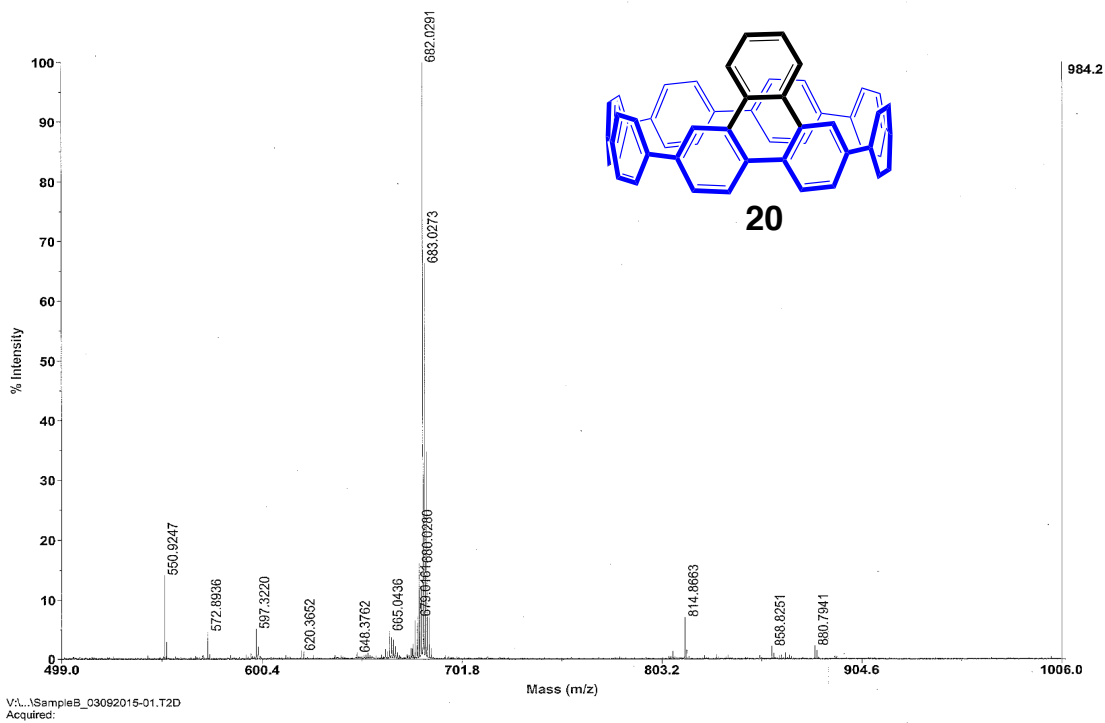

## Applied Biosystems MDS Analytical Technologies TOF/TOF™ Series Explorer™ 72039

TOF/TOF™ Reflector Spec #1[BP = 682.1, 984]

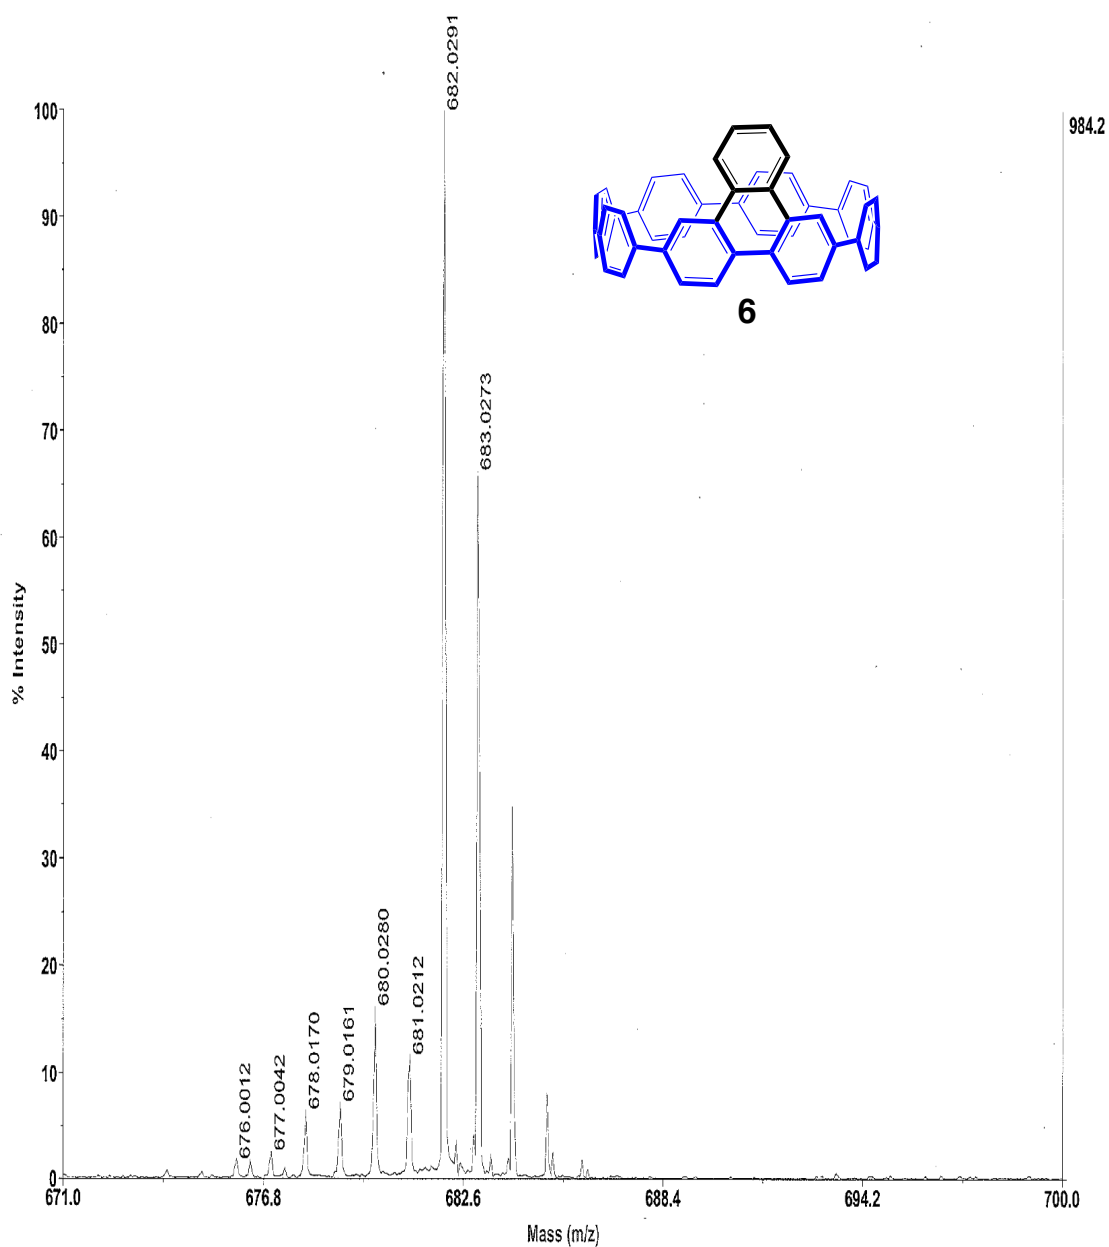

**Triflic Acid Scholl Reaction on Mono-aryl [8]CPP (19):** A 2 mL oven dried vial with cap was charged with a dry stirbar, mono-aryl substituted [8]CPP **5** (10 mg, 0.0146 mmol, 1 eq.), and dichloromethane (0.110 mL, sparged with O<sub>2</sub> separately). Trifluoromethanesulfonic acid (0.002 mL, or one drop, 0.0292, 2 eq.) was added and the reaction was heated to reflux after being sealed. The reaction was monitored by thin layer chromatography, and the reaction was stirred for one hour. At one hour, the reaction was quenched by addition of sodium bicarbonate. The reaction was diluted with dichloromethane (5 mL), and the aqueous and organic layers were separated. The aqueous layer was extracted with dichloromethane (3 X 3 mL), washed with brine, and dried over sodium sulfate. The solvent was removed under reduced pressure to yield a crude solid, which was purified by preparatory thin layer chromatography (5:95 ethyl acetate:dichloromethane) to afford a single band (4 mg). Characterization included <sup>1</sup>H NMR (crude and purified material), and MALDI-TOF MS.

**Triflic Acid Scholl Reaction on [8]CPP (22):** A 2 mL oven dried vial with cap was purged with argon after being charged with a dry stirbar, [8]CPP (**7**) (8.5 mg, 0.014 mmol, 1 eq.), and dichloromethane (0.5 mL, sparged with argon to quell dimerization/oligomerization). Trifluoromethanesulfonic acid (0.006 mL, or three drops, 0.0876, 6 eq.) was added and the reaction was heated to reflux after being sealed. The reaction was monitored by thin layer chromatography, and the reaction was stirred for one hour. At one hour, the reaction was quenched by addition of sodium bicarbonate. The reaction was diluted with dichloromethane (5 mL), and the aqueous and organic layers were separated. The aqueous layer was extracted with dichloromethane (3 X 3 mL),



washed with brine, and dried over sodium sulfate. The solvent was removed under reduced pressure to yield a crude solid (4.5 mg), which was purified by recycling GPC. The purification was conducted by recycling the material 3 times, at which point fractions were collected due to overlap (the peak with the shortest  $R_t$  began to overlap the peaks with the longest  $R_t$ ). These collected fractions were then injected again (separate runs for each previously collected fraction) as the mixture contained compounds with very different  $R_t$ . The amounts ultimately collected from the GPC were less than 1 mg. Characterization included  $^1\text{H}$  NMR, MALDI-TOF MS, and single crystal X-Ray diffraction.

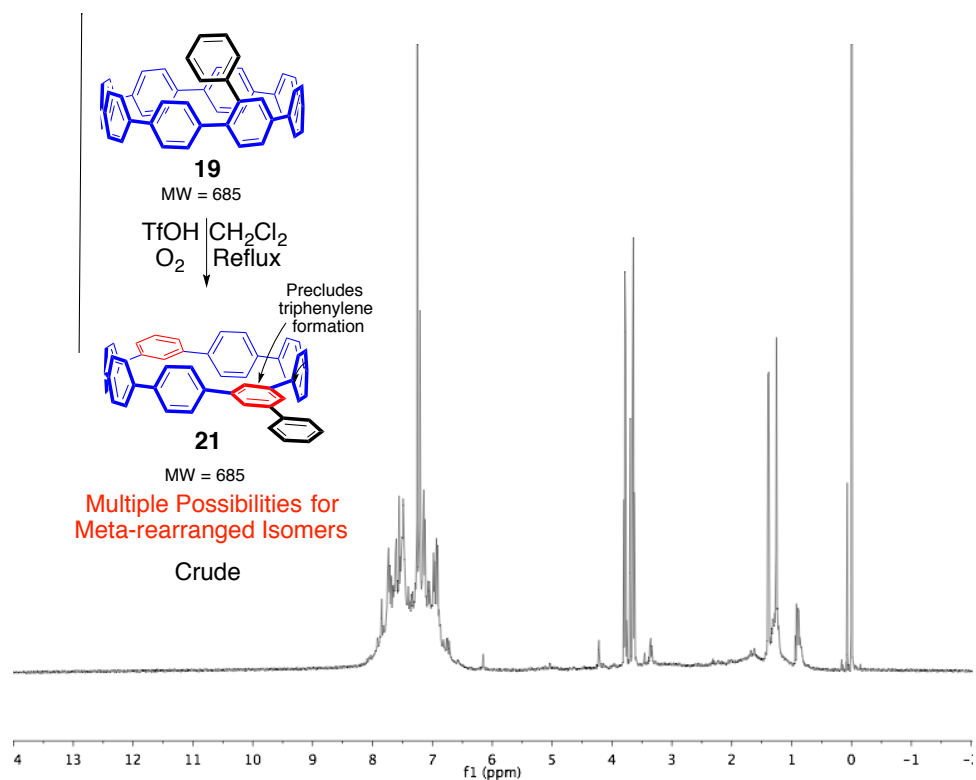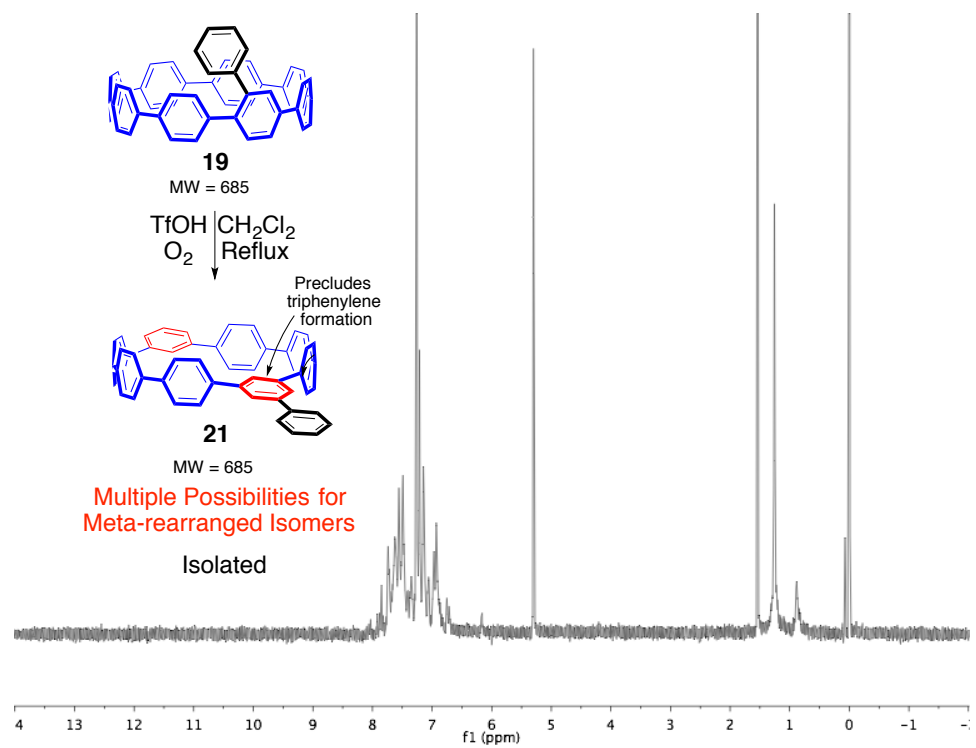

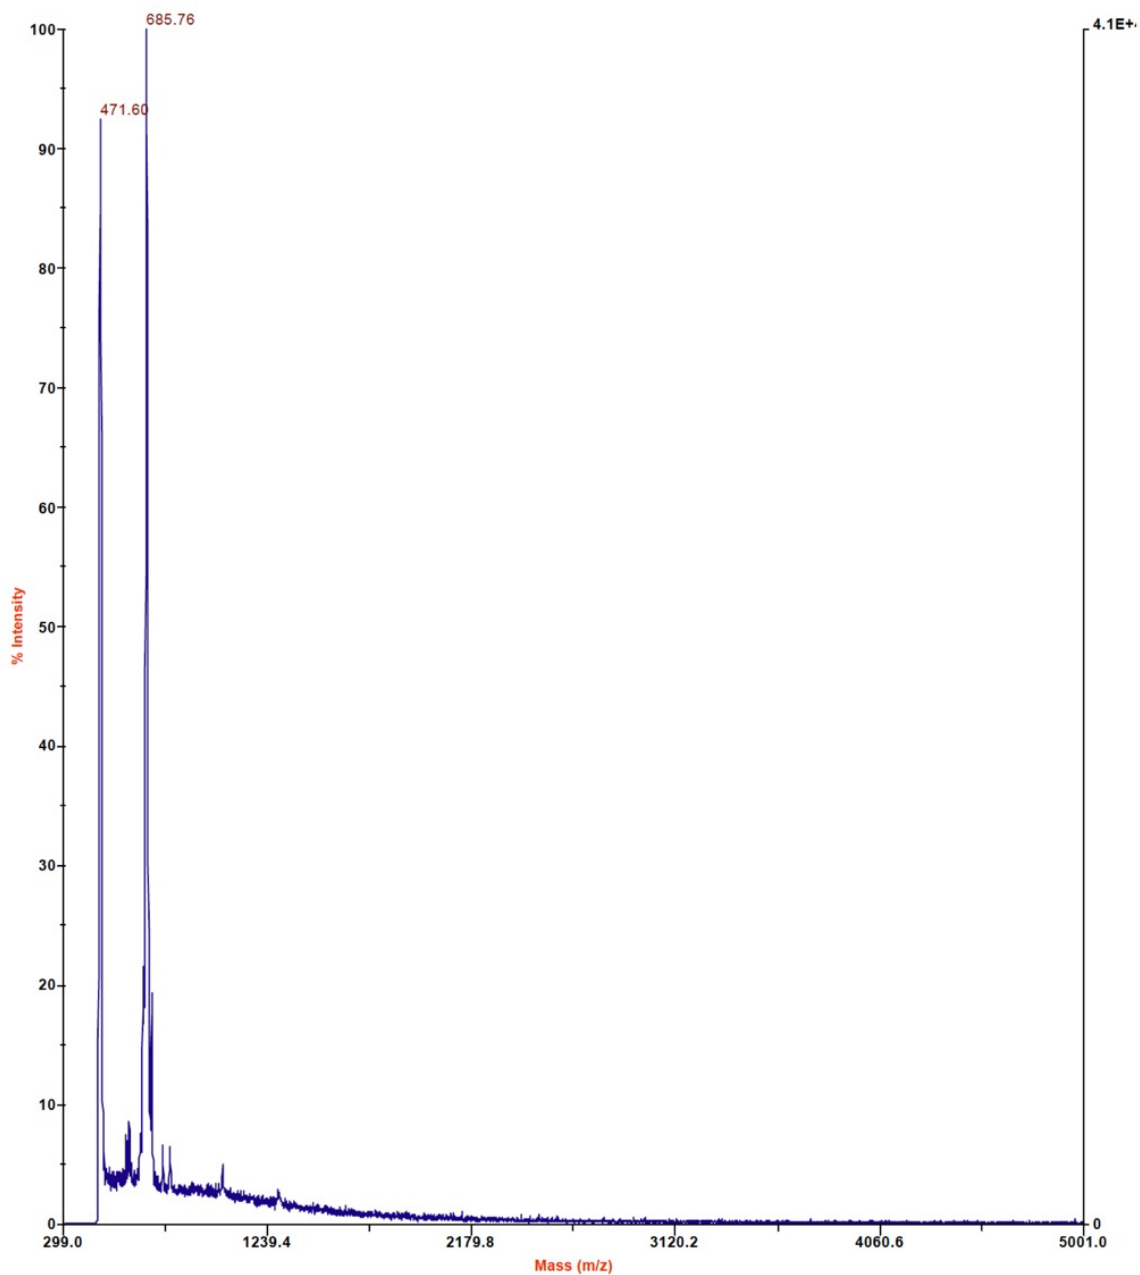

The MALDI-TOF spectra obtained of the purified material from the attempted Scholl reaction of **19** with triflic acid. The peak at 471.60 is potentially attributable to the dimer with 2 sodium adducts and 3<sup>+</sup> charge  $(2M+2Na)^{+3}$ .

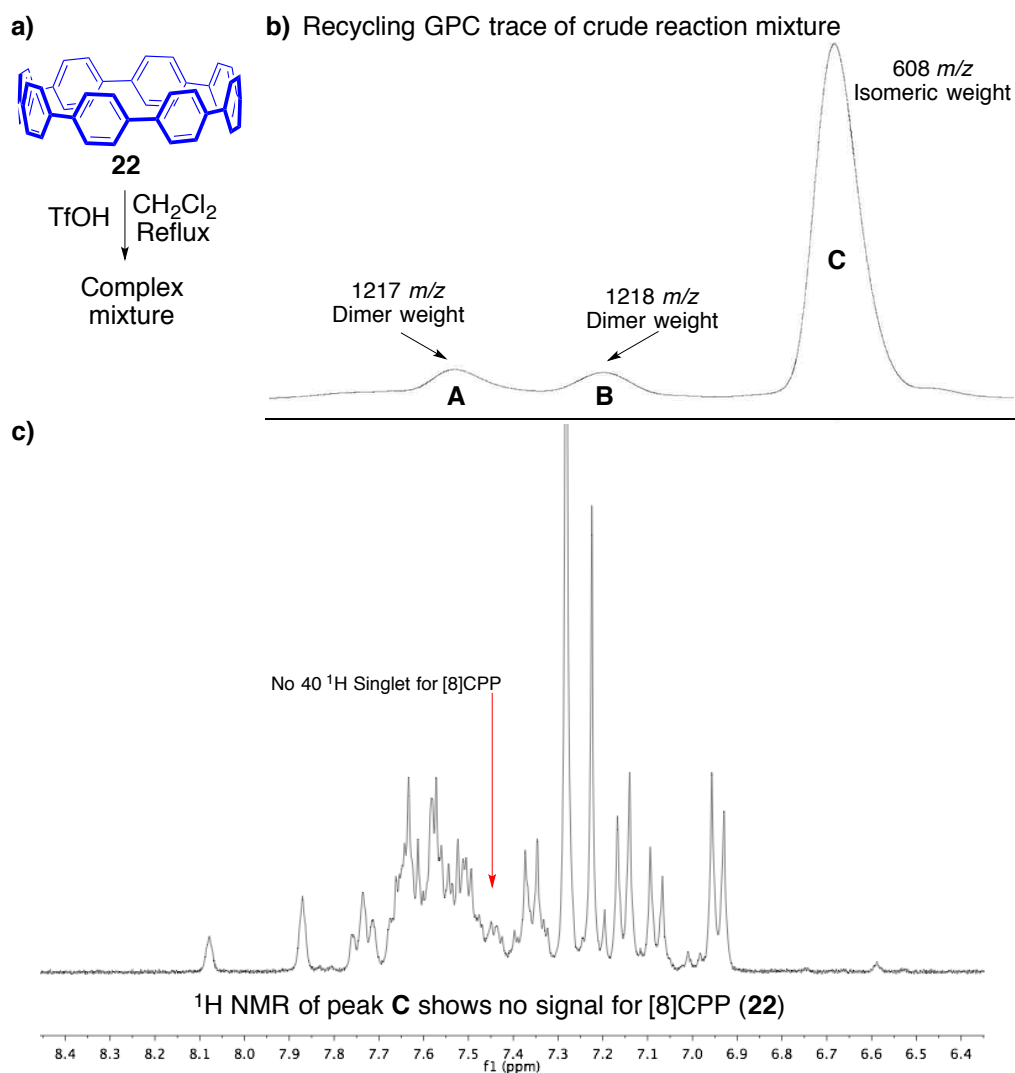

**Figure 6.** a) Reaction conditions to investigate the potential cationic rearrangement of [8]CPP. b) The recycling GPC trace from the first of four cycles of the crude reaction mixture, along with the corresponding MALDI-TOF masses. c) The <sup>1</sup>H NMR of peak C collected from the recycling GPC. The spectra shows a complex mixture of compounds and no [8]CPP, while MALDI-TOF displays simply the isomeric 608.1 m/z.

**Figure 6** from the article. Raw data is presented in the following pages.

## Event Log

File Name:Rearranged8CPPfirstrun.crm

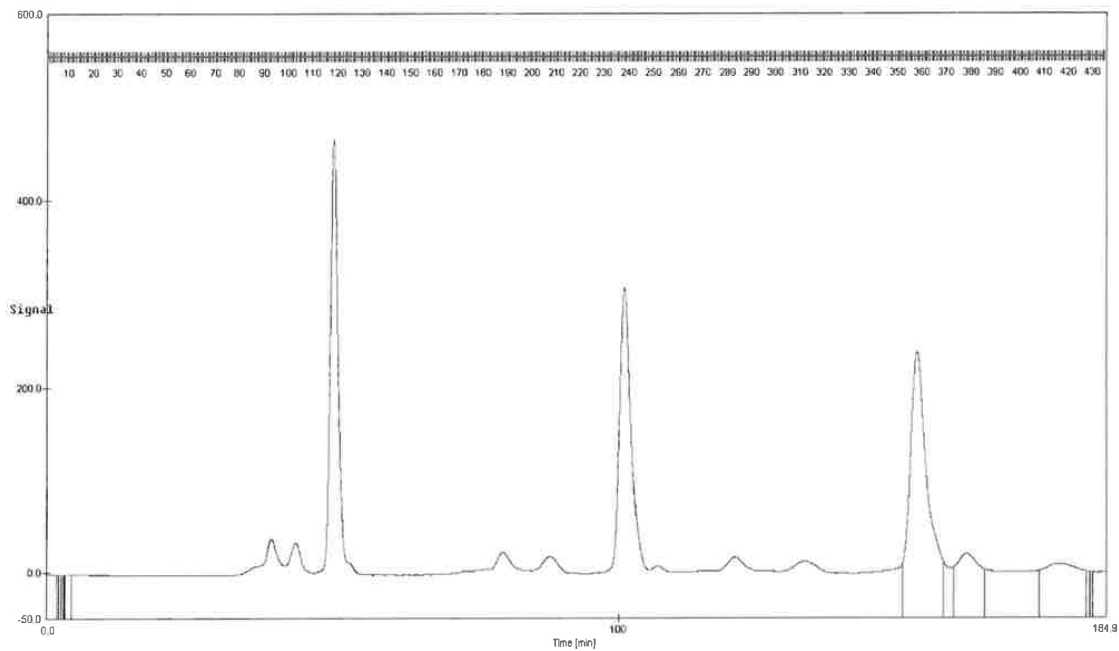

Initial injection of the crude material from the exposure of [8]CPP (**22**) to triflic acid Scholl conditions. The material was recycled 3 times before collection and subsequently each fraction was put through a second, individual injection.

Event Log

File Name:Rearranged8CPP1stpeakmainspotclean.crm

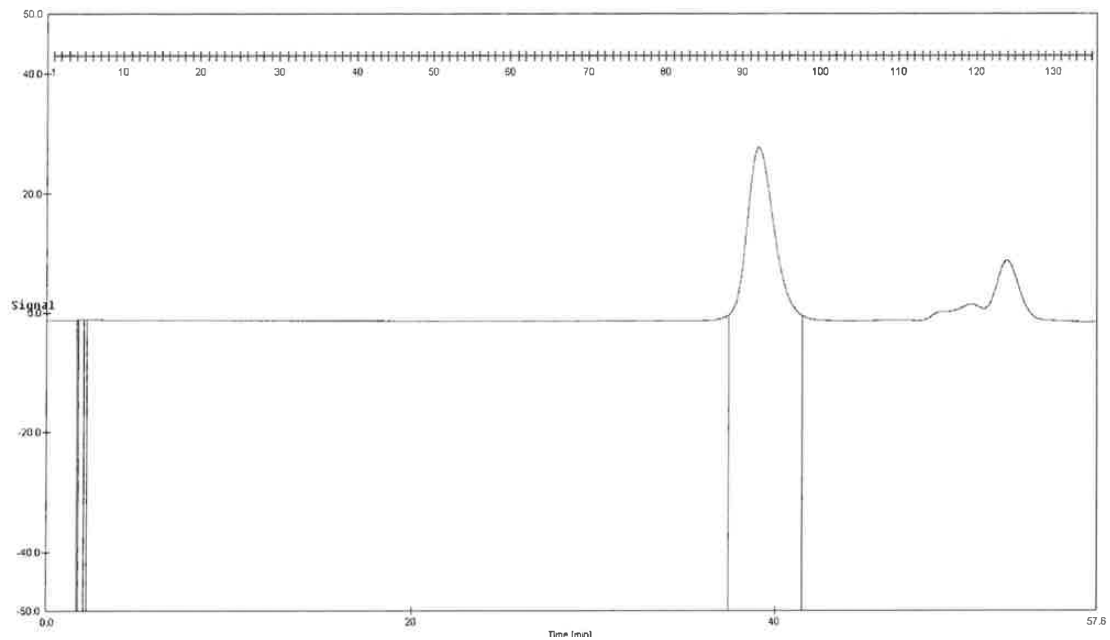

The final collection of peak A.

Event Log

File Name:Rearranged8CPP2ndpeakmainspotclean.crm

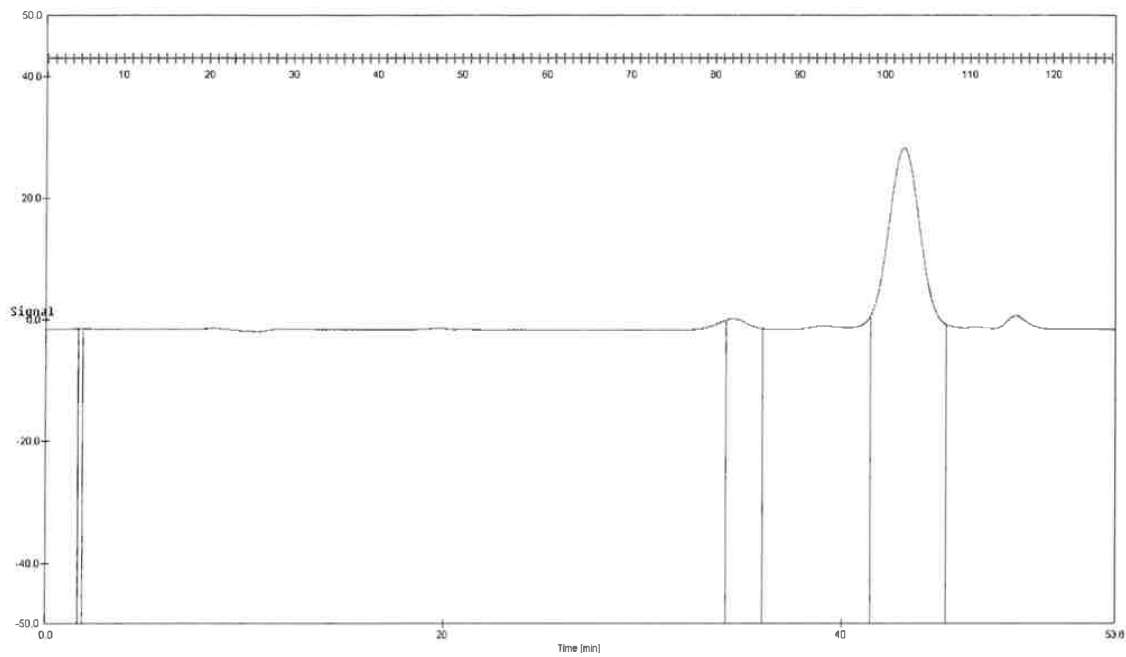

Final collection of peak **B**.

**Event Log**

File Name:Rearranged8CPP3rdpeakmainspotclean.crm

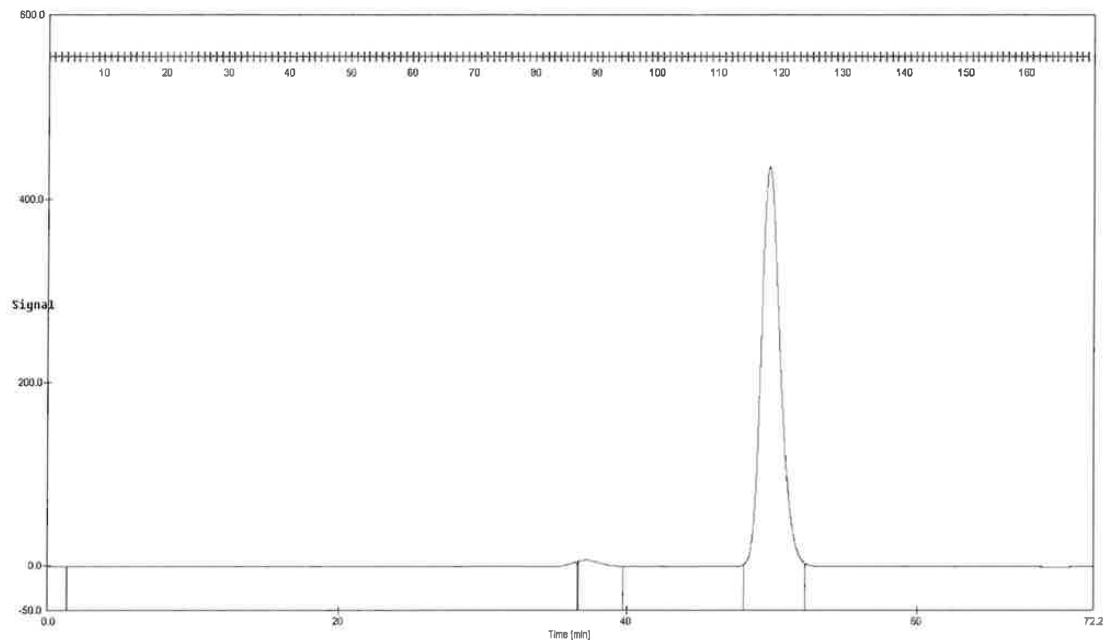

Final collection of peak C.



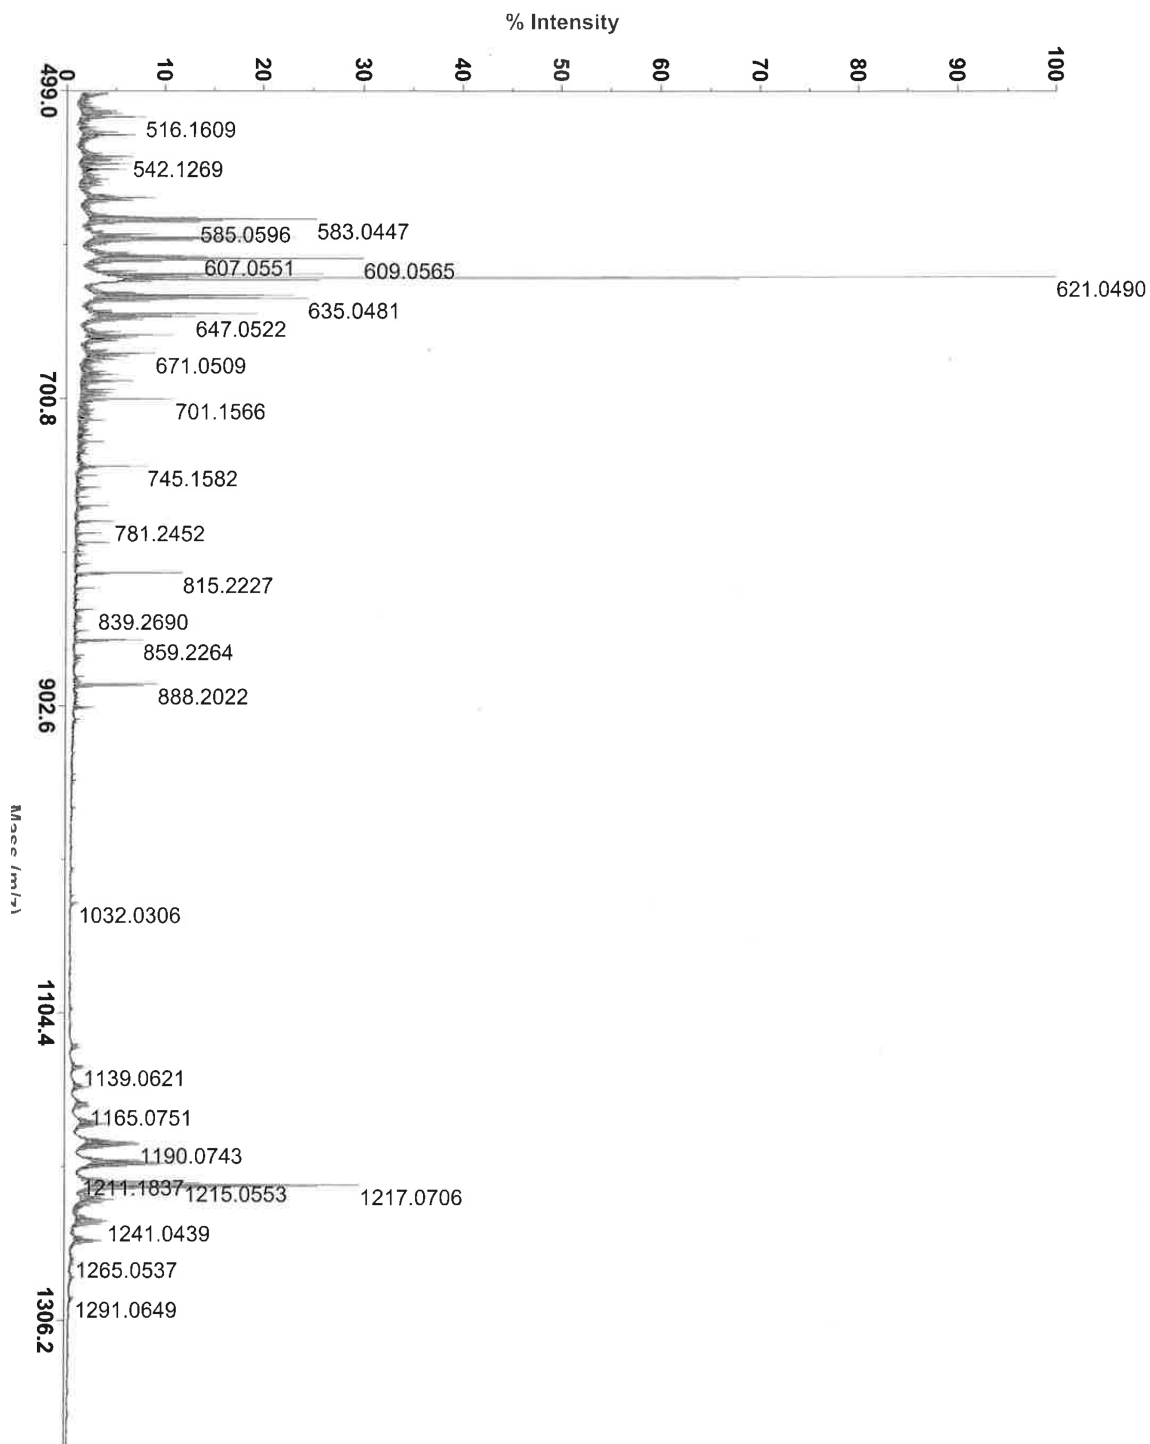

MALDI-TOF spectrum of GPC peak A.

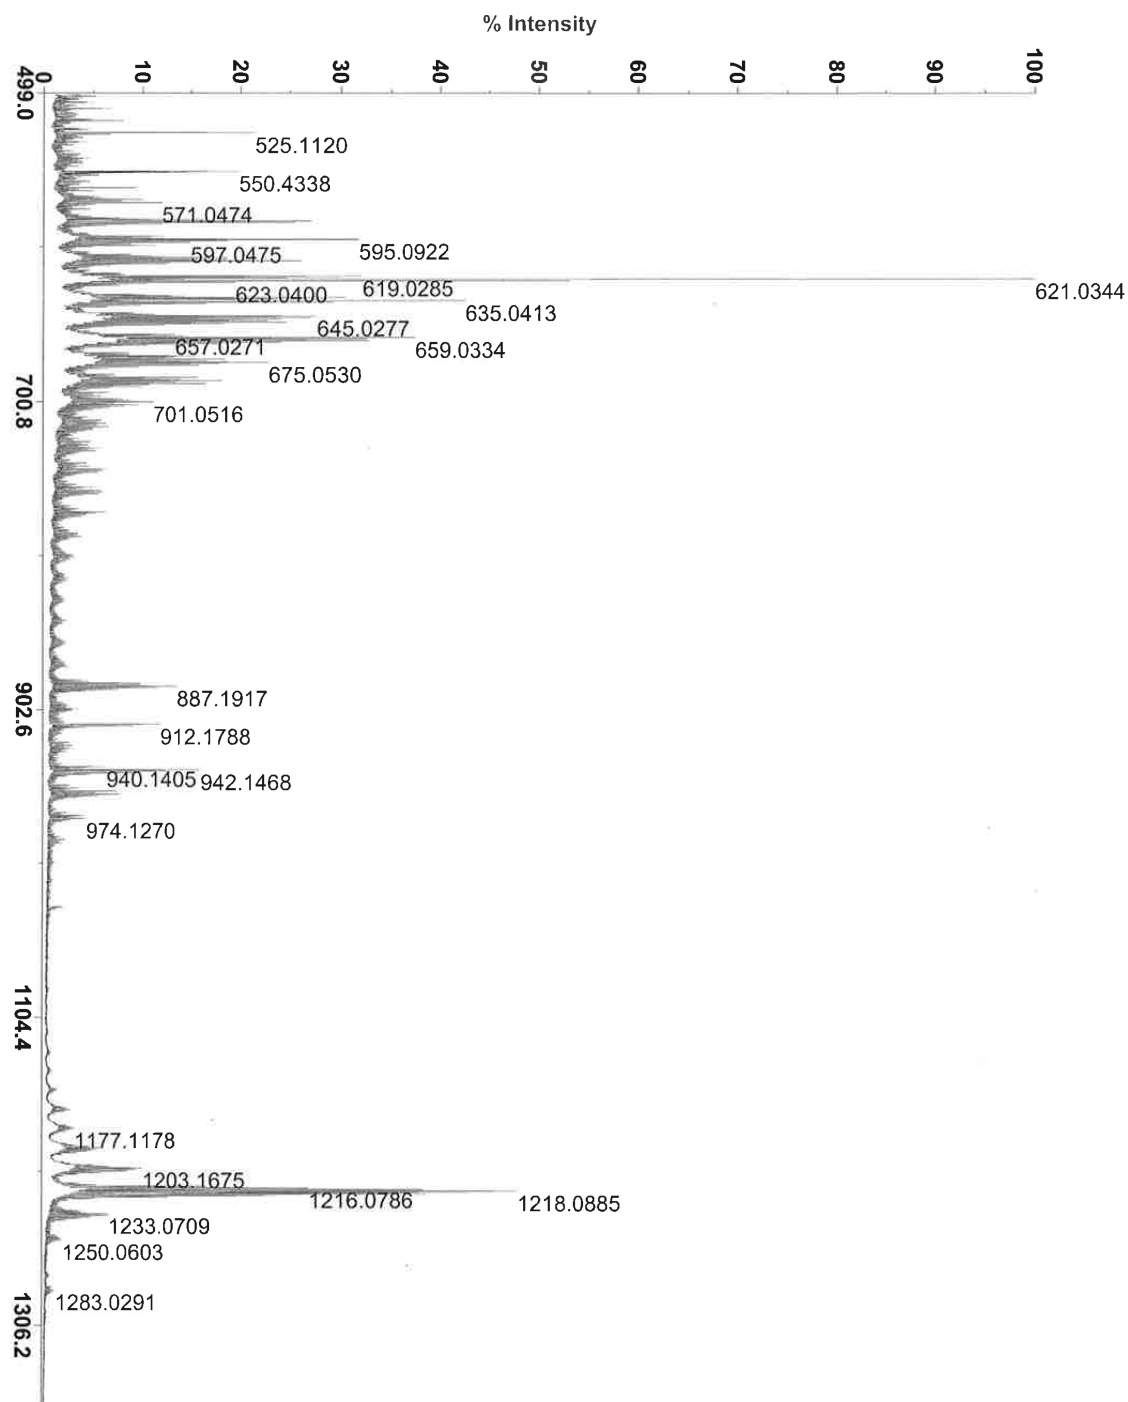MALDI-TOF spectrum of GPC peak **B**.

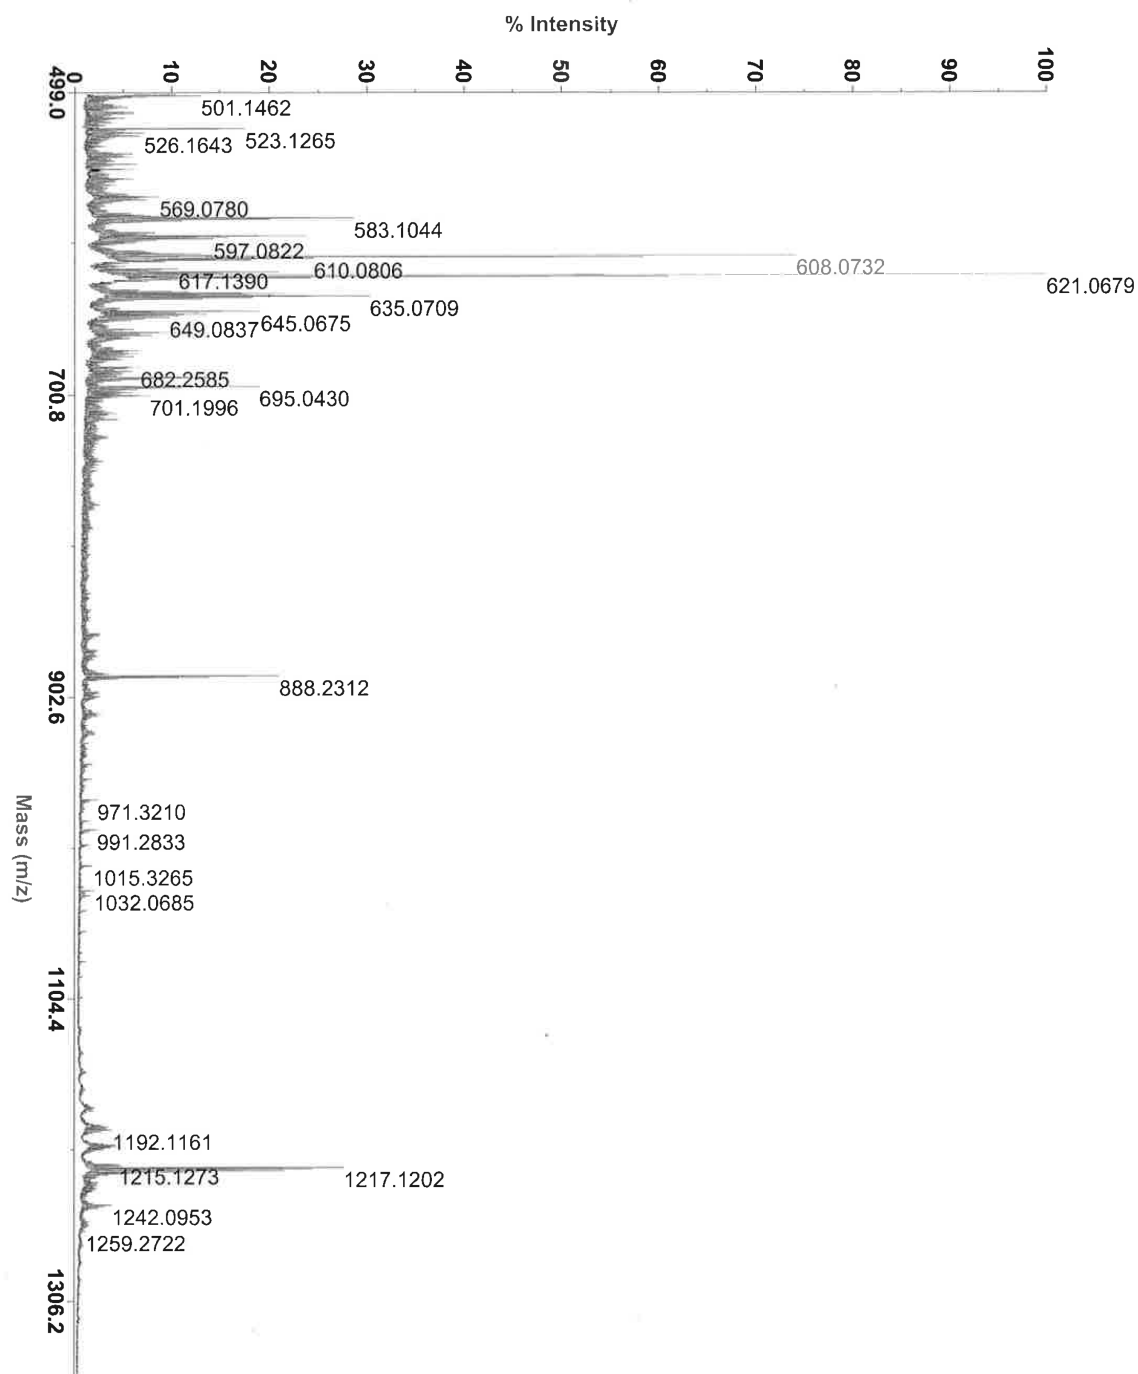

MALDI-TOF spectrum of GPC peak C.

**Computational Data:** Calculations performed on [8]CPP (**22-22e**), and compound **23** were conducted with B3LYP/6-31+(d,p), while the calculations conducted on highly aryl-substituted [8]CPP (**27-27e**) were performed with B3LYP/6-31(d,p) due to the high computational cost of these larger molecules. Radicals **25** and **26** (Nu = H) were minimized at the B3LYP/6-31(d) level of theory.

A value of 962.034875 Hartree/Particle was used for TfOH as reported in the literature<sup>7</sup>.

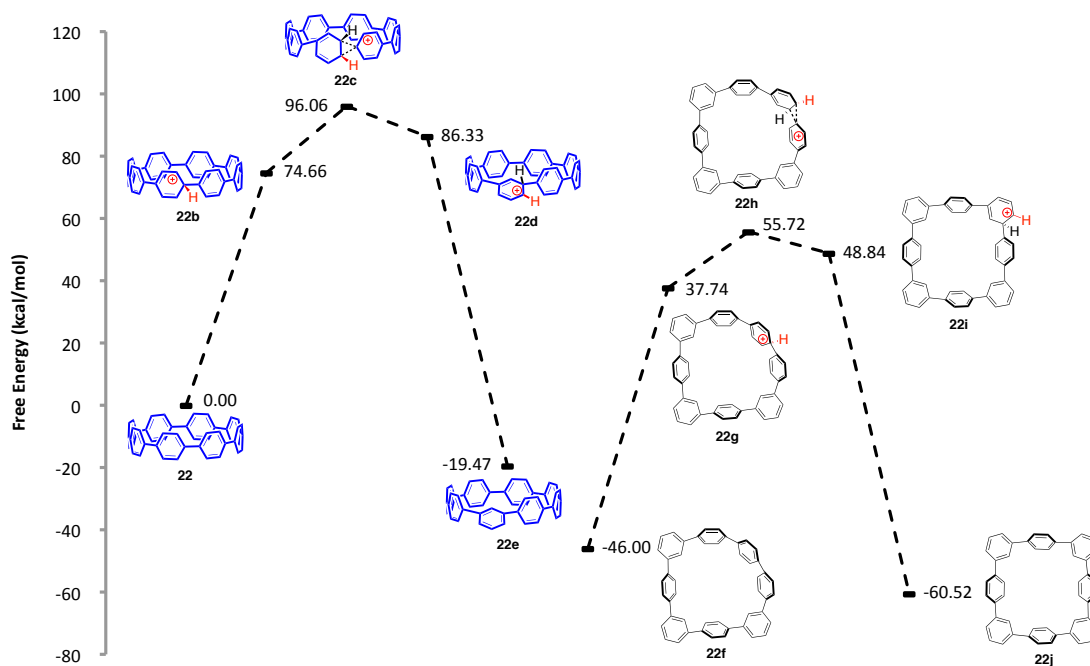

**Figure 8.** Calculated reaction coordinate for the *ipso* protonation and subsequent meta-rearrangement of [8]CPP (**22**).

<sup>7</sup> Ajaz, A.; McLaughlin, E. C.; Skraba, S. L.; Thamatam, R.; Johnson, R. P. *J. Org. Chem.* **2012**, *77*, 9487-9495

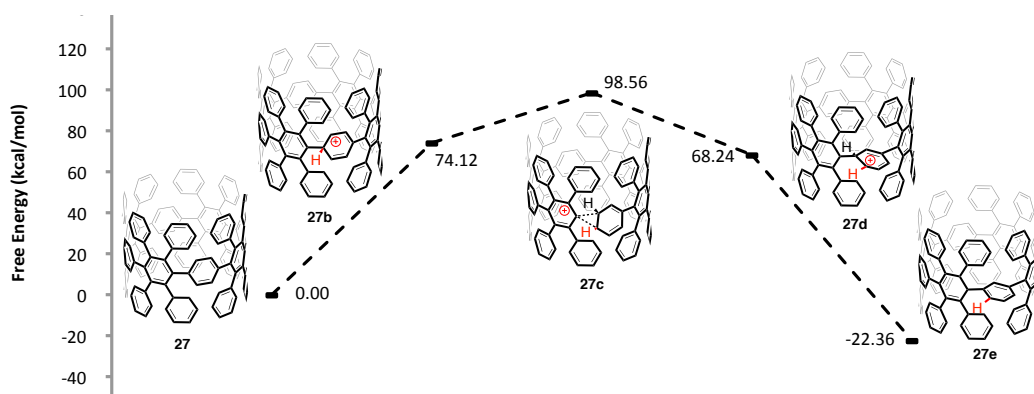

**Figure 10.** Calculated reaction coordinate for the *ipso* protonation and subsequent meta-rearrangement of fully aryl-substituted [8]CPP (27)

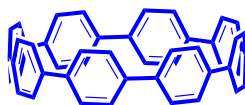

**22**

Charge = 0 Multiplicity = 1

|   |          |         |          |
|---|----------|---------|----------|
| H | 3.55858  | 5.28597 | 1.87681  |
| C | 3.6996   | 4.69415 | 0.97448  |
| C | 4.05048  | 3.062   | -1.24256 |
| C | 2.78719  | 4.79961 | -0.08682 |
| C | 4.69415  | 3.6996  | 0.97448  |
| C | 4.79961  | 2.78719 | -0.08682 |
| C | 3.062    | 4.05048 | -1.24256 |
| H | 5.28597  | 3.55858 | 1.87681  |
| H | 2.39583  | 4.09289 | -2.10228 |
| H | 4.09289  | 2.39583 | -2.10228 |
| C | 1.423    | 5.36468 | 0.08682  |
| C | -1.423   | 5.36468 | 0.08682  |
| C | 0.69896  | 5.02929 | 1.24256  |
| C | 0.70326  | 5.93528 | -0.97448 |
| C | -0.70326 | 5.93528 | -0.97448 |
| C | -0.69896 | 5.02929 | 1.24256  |
| H | 1.2      | 4.58822 | 2.10228  |
| H | 1.22145  | 6.25404 | -1.87681 |
| H | -1.22145 | 6.25404 | -1.87681 |
| H | -1.2     | 4.58822 | 2.10228  |
| C | -2.78719 | 4.79961 | -0.08682 |
| C | -4.79961 | 2.78719 | -0.08682 |
| C | -3.062   | 4.05048 | -1.24256 |
| C | -3.6996  | 4.69415 | 0.97448  |

|   |          |          |          |
|---|----------|----------|----------|
| C | -4.69415 | 3.6996   | 0.97448  |
| C | -4.05048 | 3.062    | -1.24256 |
| H | -2.39583 | 4.09289  | -2.10228 |
| H | -3.55858 | 5.28597  | 1.87681  |
| H | -5.28597 | 3.55858  | 1.87681  |
| H | -4.09289 | 2.39583  | -2.10228 |
| C | -5.36468 | 1.423    | 0.08682  |
| C | -5.36468 | -1.423   | 0.08682  |
| C | -5.02929 | 0.69896  | 1.24256  |
| C | -5.93528 | 0.70326  | -0.97448 |
| C | -5.93528 | -0.70326 | -0.97448 |
| C | -5.02929 | -0.69896 | 1.24256  |
| H | -4.58822 | 1.2      | 2.10228  |
| H | -6.25404 | 1.22145  | -1.87681 |
| H | -6.25404 | -1.22145 | -1.87681 |
| H | -4.58822 | -1.2     | 2.10228  |
| C | -4.05048 | -3.062   | -1.24256 |
| C | -3.6996  | -4.69415 | 0.97448  |
| C | -4.79961 | -2.78719 | -0.08682 |
| C | -3.062   | -4.05048 | -1.24256 |
| C | -2.78719 | -4.79961 | -0.08682 |
| C | -4.69415 | -3.6996  | 0.97448  |
| H | -2.39583 | -4.09289 | -2.10228 |
| H | -5.28597 | -3.55858 | 1.87681  |
| H | -3.55858 | -5.28597 | 1.87681  |
| C | 5.36468  | 1.423    | 0.08682  |
| C | 5.36468  | -1.423   | 0.08682  |
| C | 5.93528  | 0.70326  | -0.97448 |
| C | 5.02929  | 0.69896  | 1.24256  |
| C | 5.02929  | -0.69896 | 1.24256  |
| C | 5.93528  | -0.70326 | -0.97448 |
| H | 6.25404  | 1.22145  | -1.87681 |
| H | 4.58822  | 1.2      | 2.10228  |
| H | 4.58822  | -1.2     | 2.10228  |
| H | 6.25404  | -1.22145 | -1.87681 |
| C | 4.79961  | -2.78719 | -0.08682 |
| C | 2.78719  | -4.79961 | -0.08682 |
| C | 4.05048  | -3.062   | -1.24256 |
| C | 4.69415  | -3.6996  | 0.97448  |
| C | 3.6996   | -4.69415 | 0.97448  |
| C | 3.062    | -4.05048 | -1.24256 |
| H | 4.09289  | -2.39583 | -2.10228 |
| H | 5.28597  | -3.55858 | 1.87681  |
| H | 3.55858  | -5.28597 | 1.87681  |

|   |          |          |          |
|---|----------|----------|----------|
| H | 2.39583  | -4.09289 | -2.10228 |
| C | 1.423    | -5.36468 | 0.08682  |
| C | -1.423   | -5.36468 | 0.08682  |
| C | 0.70326  | -5.93528 | -0.97448 |
| C | 0.69896  | -5.02929 | 1.24256  |
| C | -0.69896 | -5.02929 | 1.24256  |
| C | -0.70326 | -5.93528 | -0.97448 |
| H | 1.22145  | -6.25404 | -1.87681 |
| H | 1.2      | -4.58822 | 2.10228  |
| H | -1.2     | -4.58822 | 2.10228  |
| H | -1.22145 | -6.25404 | -1.87681 |
| H | -4.09289 | -2.39583 | -2.10228 |

|                                              |                             |
|----------------------------------------------|-----------------------------|
| Zero-point correction=                       | 0.643127 (Hartree/Particle) |
| Thermal correction to Energy=                | 0.677934                    |
| Thermal correction to Enthalpy=              | 0.678878                    |
| Thermal correction to Gibbs Free Energy=     | 0.579414                    |
| Sum of electronic and zero-point Energies=   | -1847.800681                |
| Sum of electronic and thermal Energies=      | -1847.765874                |
| Sum of electronic and thermal Enthalpies=    | -1847.764929                |
| Sum of electronic and thermal Free Energies= | -1847.864394                |

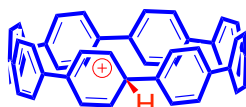**22b**

Charge = 1 Multiplicity = 1

|   |         |          |          |
|---|---------|----------|----------|
| H | 4.613   | 1.10108  | -1.89312 |
| C | 4.57024 | 1.86366  | -1.12342 |
| C | 4.36642 | 3.81879  | 0.84848  |
| C | 5.52753 | 1.90161  | -0.10337 |
| C | 3.51572 | 2.7744   | -1.14194 |
| C | 3.35643 | 3.7331   | -0.12742 |
| C | 5.43744 | 2.92337  | 0.85581  |
| H | 2.75963 | 2.68833  | -1.91613 |
| H | 6.19066 | 3.01081  | 1.63515  |
| H | 4.30576 | 4.57977  | 1.62101  |
| C | 6.58323 | 0.76475  | 0.06011  |
| C | 5.40116 | -1.90254 | 0.09614  |
| C | 6.61616 | -0.15719 | -1.11591 |
| C | 6.2255  | 0.0356   | 1.32003  |
| C | 5.66617 | -1.19993 | 1.3264   |

|   |          |          |          |
|---|----------|----------|----------|
| C | 6.04354  | -1.38442 | -1.09616 |
| H | 7.07497  | 0.20914  | -2.03058 |
| H | 5.32858  | -1.61728 | 2.26693  |
| H | 6.0632   | -1.99439 | -1.99238 |
| H | 7.56937  | 1.23963  | 0.17608  |
| C | 2.05874  | 4.4519   | -0.04074 |
| C | -0.7315  | 5.00848  | -0.00361 |
| C | 1.33375  | 4.42709  | 1.1625   |
| C | 1.40345  | 4.94679  | -1.18362 |
| C | 0.04154  | 5.23518  | -1.16079 |
| C | -0.03384 | 4.69279  | 1.17834  |
| H | 1.8117   | 4.0734   | 2.07162  |
| H | 1.9559   | 5.06356  | -2.11196 |
| H | -0.43688 | 5.57741  | -2.07327 |
| H | -0.58198 | 4.52792  | 2.10001  |
| C | 4.45567  | -2.97487 | 0.04984  |
| C | 2.02914  | -4.50412 | 0.00647  |
| C | 3.83306  | -3.35472 | -1.17766 |
| C | 3.92849  | -3.57848 | 1.23365  |
| C | 2.77754  | -4.32992 | 1.20729  |
| C | 2.66353  | -4.08396 | -1.1956  |
| H | 4.2146   | -2.97797 | -2.11941 |
| H | 4.43266  | -3.44367 | 2.18372  |
| H | 2.41721  | -4.75818 | 2.13517  |
| H | 2.17353  | -4.24402 | -2.1485  |
| C | -2.20005 | 4.78861  | -0.06514 |
| C | -4.6546  | 3.34587  | 0.00402  |
| C | -2.75309 | 4.2348   | -1.23507 |
| C | -3.02831 | 4.81544  | 1.07656  |
| C | -4.22806 | 4.10908  | 1.11125  |
| C | -3.95204 | 3.53207  | -1.20229 |
| H | -2.17504 | 4.21956  | -2.15276 |
| H | -2.69879 | 5.3316   | 1.9735   |
| H | -4.79837 | 4.08926  | 2.03548  |
| H | -4.2579  | 2.99472  | -2.09362 |
| C | -5.50207 | 2.13486  | 0.13558  |
| C | -5.95109 | -0.67087 | 0.11364  |
| C | -6.10481 | 1.50489  | -0.97632 |
| C | -5.41457 | 1.37761  | 1.32003  |
| C | -5.63469 | 0.00507  | 1.30993  |
| C | -6.31766 | 0.131    | -0.99012 |
| H | -6.32004 | 2.07906  | -1.87256 |
| H | -5.00731 | 1.82764  | 2.21912  |
| H | -5.39126 | -0.55999 | 2.20345  |



|   |          |          |          |
|---|----------|----------|----------|
| H | -6.69379 | -0.33282 | -1.89744 |
| C | 0.62518  | -4.90045 | 0.02366  |
| C | -2.22878 | -4.75059 | -0.03303 |
| C | -0.10554 | -5.17582 | -1.1619  |
| C | -0.13253 | -4.77899 | 1.21517  |
| C | -1.51408 | -4.70821 | 1.18712  |
| C | -1.48784 | -5.11676 | -1.1859  |
| H | 0.41707  | -5.40397 | -2.08493 |
| H | 0.36307  | -4.61375 | 2.16459  |
| H | -2.03628 | -4.48169 | 2.10947  |
| H | -2.00212 | -5.29493 | -2.12437 |
| C | -5.50551 | -2.074   | -0.03226 |
| C | -3.57703 | -4.16556 | -0.10822 |
| C | -4.91245 | -2.47439 | -1.2486  |
| C | -5.3222  | -2.9358  | 1.07492  |
| C | -4.37432 | -3.9485  | 1.04123  |
| C | -3.97051 | -3.4933  | -1.286   |
| H | -5.06409 | -1.87973 | -2.14268 |
| H | -5.86514 | -2.75382 | 1.99724  |
| H | -4.20646 | -4.53568 | 1.93894  |
| H | -3.43018 | -3.6553  | -2.21227 |
| H | 6.33964  | 0.57389  | 2.25606  |

|                                              |                             |
|----------------------------------------------|-----------------------------|
| Zero-point correction=                       | 0.656012 (Hartree/Particle) |
| Thermal correction to Energy=                | 0.691352                    |
| Thermal correction to Enthalpy=              | 0.692296                    |
| Thermal correction to Gibbs Free Energy=     | 0.589679                    |
| Sum of electronic and zero-point Energies=   | -1848.154477                |
| Sum of electronic and thermal Energies=      | -1848.119137                |
| Sum of electronic and thermal Enthalpies=    | -1848.118193                |
| Sum of electronic and thermal Free Energies= | -1848.220811                |

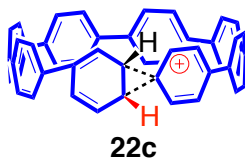

Charge = 1 Multiplicity = 1

|   |         |          |          |
|---|---------|----------|----------|
| H | 4.16474 | -0.56509 | 1.02238  |
| C | 4.14763 | -1.53812 | 0.54793  |
| C | 4.02151 | -4.04064 | -0.69552 |
| C | 5.14    | -1.90062 | -0.38879 |
| C | 3.10507 | -2.39339 | 0.82073  |

|   |          |          |          |
|---|----------|----------|----------|
| C | 2.9661   | -3.6444  | 0.16195  |
| C | 5.09861  | -3.20226 | -0.94683 |
| H | 2.32207  | -2.05496 | 1.48866  |
| H | 5.87786  | -3.52684 | -1.63114 |
| H | 3.98759  | -5.01045 | -1.18139 |
| C | 6.87236  | -1.17071 | 0.00272  |
| C | 5.55392  | 1.38742  | -0.09825 |
| C | 6.99812  | -0.24529 | 1.08462  |
| C | 6.0675   | -0.79681 | -1.15028 |
| C | 5.49305  | 0.54857  | -1.18106 |
| C | 6.3776   | 0.97567  | 1.02705  |
| H | 7.62362  | -0.50748 | 1.93124  |
| H | 4.90205  | 0.81446  | -2.05085 |
| H | 6.51992  | 1.67803  | 1.84315  |
| H | 7.50286  | -2.05086 | -0.03666 |
| H | 6.33532  | -1.21898 | -2.11566 |
| C | 1.69175  | -4.35773 | 0.29396  |
| C | -1.10745 | -4.91311 | 0.26474  |
| C | 1.0879   | -4.99987 | -0.81007 |
| C | 0.90341  | -4.20922 | 1.45677  |
| C | -0.45047 | -4.49255 | 1.44588  |
| C | -0.2762  | -5.27197 | -0.82163 |
| H | 1.66327  | -5.18602 | -1.71219 |
| H | 1.34792  | -3.8188  | 2.3671   |
| H | -1.025   | -4.27542 | 2.3383   |
| H | -0.71144 | -5.68845 | -1.72371 |
| C | 4.68538  | 2.58459  | -0.02049 |
| C | 2.40282  | 4.28671  | 0.01474  |
| C | 4.0064   | 2.86116  | 1.1803   |
| C | 4.31008  | 3.31646  | -1.16363 |
| C | 3.20595  | 4.16115  | -1.14002 |
| C | 2.88553  | 3.68728  | 1.19388  |
| H | 4.27826  | 2.34297  | 2.09591  |
| H | 4.87009  | 3.20303  | -2.08787 |
| H | 2.93287  | 4.69202  | -2.04633 |
| H | 2.31739  | 3.77545  | 2.11364  |
| C | -2.56264 | -4.68897 | 0.12702  |
| C | -4.91254 | -3.09439 | -0.15696 |
| C | -3.37059 | -4.3717  | 1.24112  |
| C | -3.13186 | -4.44226 | -1.1413  |
| C | -4.28704 | -3.68214 | -1.27859 |
| C | -4.51003 | -3.5907  | 1.10298  |
| H | -3.05938 | -4.65117 | 2.24228  |
| H | -2.60771 | -4.73791 | -2.04388 |

|   |          |          |          |
|---|----------|----------|----------|
| H | -4.62863 | -3.44805 | -2.28079 |
| H | -5.01571 | -3.26392 | 2.0047   |
| C | -5.65028 | -1.80923 | -0.25874 |
| C | -5.86201 | 1.02992  | -0.14412 |
| C | -6.19545 | -1.16151 | 0.87268  |
| C | -5.49975 | -1.01679 | -1.41521 |
| C | -5.60437 | 0.36777  | -1.36004 |
| C | -6.2971  | 0.22559  | 0.92997  |
| H | -6.45706 | -1.73272 | 1.7577   |
| H | -5.14548 | -1.45776 | -2.33962 |
| H | -5.31974 | 0.9404   | -2.23656 |
| H | -6.62932 | 0.68926  | 1.85431  |
| C | 1.0088   | 4.79179  | -0.04153 |
| C | -1.84062 | 4.84056  | 0.00914  |
| C | 0.30775  | 5.22781  | 1.10121  |
| C | 0.25493  | 4.58228  | -1.21148 |
| C | -1.13524 | 4.60839  | -1.18697 |
| C | -1.08469 | 5.25641  | 1.12454  |
| H | 0.85191  | 5.49973  | 2.00119  |
| H | 0.74695  | 4.2657   | -2.12539 |
| H | -1.67509 | 4.308    | -2.07885 |
| H | -1.5897  | 5.54325  | 2.04223  |
| C | -5.31064 | 2.39668  | 0.03929  |
| C | -3.2347  | 4.33913  | 0.116    |
| C | -4.62288 | 2.6791   | 1.23516  |
| C | -5.11184 | 3.28918  | -1.03496 |
| C | -4.09347 | 4.23823  | -0.99811 |
| C | -3.60674 | 3.62933  | 1.2726   |
| H | -4.76699 | 2.04297  | 2.10226  |
| H | -5.70128 | 3.18526  | -1.94137 |
| H | -3.91486 | 4.85267  | -1.87601 |
| H | -2.99881 | 3.70091  | 2.16882  |

Imaginary Frequency = -233.3030

|                                              |                             |
|----------------------------------------------|-----------------------------|
| Zero-point correction=                       | 0.654625 (Hartree/Particle) |
| Thermal correction to Energy=                | 0.689484                    |
| Thermal correction to Enthalpy=              | 0.690428                    |
| Thermal correction to Gibbs Free Energy=     | 0.589212                    |
| Sum of electronic and zero-point Energies=   | -1848.121289                |
| Sum of electronic and thermal Energies=      | -1848.086430                |
| Sum of electronic and thermal Enthalpies=    | -1848.085486                |
| Sum of electronic and thermal Free Energies= | -1848.186702                |

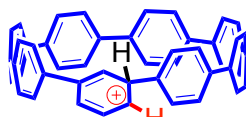**22d**

Charge = 1 Multiplicity = 1

|   |          |          |          |
|---|----------|----------|----------|
| H | 5.0486   | -2.19032 | 2.58131  |
| C | 4.74736  | -2.44016 | 1.56681  |
| C | 3.93983  | -3.10297 | -1.00856 |
| C | 5.43263  | -1.89465 | 0.47189  |
| C | 3.64388  | -3.26402 | 1.37253  |
| C | 3.17257  | -3.57231 | 0.07876  |
| C | 5.03033  | -2.25712 | -0.82125 |
| H | 3.10439  | -3.61768 | 2.24417  |
| H | 5.55945  | -1.87441 | -1.68933 |
| H | 3.66801  | -3.37738 | -2.02201 |
| C | 7.52606  | -0.61065 | -0.30025 |
| C | 5.6331   | 1.55063  | 0.01919  |
| C | 7.64146  | 0.52717  | -1.04685 |
| C | 6.46103  | -0.74738 | 0.72247  |
| C | 5.5791   | 0.44089  | 0.85753  |
| C | 6.70434  | 1.58667  | -0.90132 |
| H | 8.44296  | 0.6331   | -1.77092 |
| H | 4.79444  | 0.36951  | 1.60238  |
| H | 6.82426  | 2.46453  | -1.53014 |
| C | 1.84379  | -4.20036 | -0.10431 |
| C | -0.95655 | -4.74341 | -0.2011  |
| C | 1.08249  | -3.91655 | -1.25547 |
| C | 1.20135  | -4.925   | 0.92334  |
| C | -0.1637  | -5.18729 | 0.87836  |
| C | -0.27871 | -4.18741 | -1.30555 |
| H | 1.52661  | -3.37555 | -2.08404 |
| H | 1.76572  | -5.25989 | 1.78816  |
| H | -0.62868 | -5.70561 | 1.71157  |
| H | -0.84596 | -3.84607 | -2.16501 |
| C | 4.56915  | 2.58557  | 0.053    |
| C | 2.16398  | 4.11254  | 0.00028  |
| C | 3.8547   | 2.85394  | 1.23392  |
| C | 4.13088  | 3.20842  | -1.12927 |
| C | 2.96198  | 3.96582  | -1.15112 |
| C | 2.68071  | 3.59841  | 1.20647  |
| H | 4.19268  | 2.44861  | 2.18343  |

|   |          |          |          |
|---|----------|----------|----------|
| H | 4.66214  | 3.04916  | -2.06363 |
| H | 2.63961  | 4.40132  | -2.09118 |
| H | 2.11615  | 3.71398  | 2.1255   |
| C | -2.42328 | -4.57427 | -0.11343 |
| C | -4.89354 | -3.16443 | -0.06007 |
| C | -2.98777 | -4.14669 | 1.10481  |
| C | -3.25022 | -4.51449 | -1.25661 |
| C | -4.46312 | -3.83783 | -1.2273  |
| C | -4.19323 | -3.4555  | 1.13017  |
| H | -2.40904 | -4.21322 | 2.02055  |
| H | -2.9079  | -4.94389 | -2.19378 |
| H | -5.03918 | -3.75696 | -2.1438  |
| H | -4.50609 | -3.00404 | 2.06517  |
| C | -5.7386  | -1.94965 | -0.11384 |
| C | -6.09758 | 0.86837  | -0.00389 |
| C | -6.25277 | -1.32687 | 1.04734  |
| C | -5.719   | -1.16729 | -1.28772 |
| C | -5.89491 | 0.20932  | -1.23402 |
| C | -6.42939 | 0.05076  | 1.10084  |
| H | -6.42662 | -1.91111 | 1.94599  |
| H | -5.39288 | -1.60326 | -2.2255  |
| H | -5.69678 | 0.78646  | -2.13068 |
| H | -6.73353 | 0.50455  | 2.0394   |
| C | 0.75579  | 4.57802  | -0.06498 |
| C | -2.0913  | 4.65309  | 0.00767  |
| C | 0.06883  | 5.08443  | 1.05661  |
| C | -0.00941 | 4.29317  | -1.21057 |
| C | -1.39902 | 4.33343  | -1.17597 |
| C | -1.32339 | 5.12363  | 1.09172  |
| H | 0.62368  | 5.40947  | 1.93197  |
| H | 0.47233  | 3.91398  | -2.10588 |
| H | -1.95077 | 3.98093  | -2.0411  |
| H | -1.81849 | 5.46784  | 1.99503  |
| C | -5.57422 | 2.24713  | 0.14758  |
| C | -3.49199 | 4.18116  | 0.14764  |
| C | -4.88021 | 2.56907  | 1.33169  |
| C | -5.38851 | 3.11423  | -0.95204 |
| C | -4.36557 | 4.05715  | -0.95344 |
| C | -3.86078 | 3.51541  | 1.33152  |
| H | -5.01721 | 1.96169  | 2.21986  |
| H | -5.98839 | 2.98973  | -1.84868 |
| H | -4.19146 | 4.64527  | -1.85006 |
| H | -3.24493 | 3.61314  | 2.21983  |
| H | 8.22025  | -1.43649 | -0.42779 |

H 6.94537 -0.97002 1.68977

Zero-point correction= 0.654692 (Hartree/Particle)  
 Thermal correction to Energy= 0.690223  
 Thermal correction to Enthalpy= 0.691167  
 Thermal correction to Gibbs Free Energy= 0.588027  
 Sum of electronic and zero-point Energies= -1848.135540  
 Sum of electronic and thermal Energies= -1848.100009  
 Sum of electronic and thermal Enthalpies= -1848.099064  
 Sum of electronic and thermal Free Energies= -1848.202204

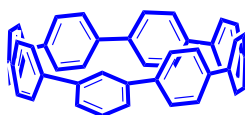

**22e**

Charge = 0 Multiplicity = 1

|   |          |          |          |
|---|----------|----------|----------|
| H | -2.12934 | 4.19183  | 2.01067  |
| C | -1.25963 | 4.03202  | 2.61661  |
| C | 0.9886   | 3.57575  | 4.14522  |
| C | -0.14341 | 4.83887  | 2.43254  |
| C | -1.22505 | 2.97013  | 3.49649  |
| C | -0.0753  | 2.68385  | 4.2263   |
| C | 0.95643  | 4.63841  | 3.25591  |
| H | -2.0598  | 2.30045  | 3.54466  |
| H | 1.82144  | 5.26213  | 3.1441   |
| H | 1.87326  | 3.40064  | 4.72553  |
| C | 0.20864  | 7.06247  | 1.20828  |
| C | -0.06231 | 5.70211  | -1.21483 |
| C | 0.3356   | 7.7319   | 0.       |
| C | -0.06231 | 5.70211  | 1.21483  |
| C | -0.19512 | 5.045    | 0.       |
| C | 0.20864  | 7.06247  | -1.20828 |
| H | 0.53534  | 8.78535  | 0.       |
| H | -0.35888 | 3.98701  | 0.       |
| H | 0.31386  | 7.59431  | -2.13327 |
| C | 0.06527  | 1.30923  | 4.79527  |
| C | 0.074    | -1.49331 | 4.98565  |
| C | 1.18765  | 0.57277  | 4.43547  |
| C | -0.98637 | 0.63345  | 5.40781  |
| C | -0.98199 | -0.74826 | 5.50244  |
| C | 1.19169  | -0.80333 | 4.52905  |
| H | 2.01137  | 1.06515  | 3.95953  |

|   |          |          |          |
|---|----------|----------|----------|
| H | -1.84136 | 1.18247  | 5.75113  |
| H | -1.83519 | -1.25105 | 5.9144   |
| H | 2.01657  | -1.35028 | 4.11983  |
| C | -0.14341 | 4.83887  | -2.43254 |
| C | -0.0753  | 2.68385  | -4.2263  |
| C | -1.25963 | 4.03202  | -2.61661 |
| C | 0.95643  | 4.63841  | -3.25591 |
| C | 0.9886   | 3.57575  | -4.14522 |
| C | -1.22505 | 2.97013  | -3.49649 |
| H | -2.12934 | 4.19183  | -2.01067 |
| H | 1.82144  | 5.26213  | -3.1441  |
| H | 1.87326  | 3.40064  | -4.72553 |
| H | -2.0598  | 2.30045  | -3.54466 |
| C | -0.06655 | -2.91809 | 4.55257  |
| C | -0.04744 | -5.06857 | 2.7481   |
| C | -1.20344 | -3.24812 | 3.82463  |
| C | 1.00518  | -3.80659 | 4.51637  |
| C | 1.01362  | -4.86894 | 3.62817  |
| C | -1.1936  | -4.30421 | 2.93729  |
| H | -2.04715 | -2.58832 | 3.83649  |
| H | 1.87146  | -3.61842 | 5.12024  |
| H | 1.8871   | -5.4874  | 3.55695  |
| H | -2.02872 | -4.43448 | 2.27982  |
| C | 0.12082  | -5.70618 | 1.40362  |
| C | 0.12082  | -5.70618 | -1.40362 |
| C | -0.93846 | -6.26561 | 0.69245  |
| C | 1.26245  | -5.36045 | 0.68954  |
| C | 1.26245  | -5.36045 | -0.68954 |
| C | -0.93846 | -6.26561 | -0.69245 |
| H | -1.80676 | -6.61343 | 1.2175   |
| H | 2.09883  | -4.93473 | 1.20518  |
| H | 2.09883  | -4.93473 | -1.20518 |
| H | -1.80676 | -6.61343 | -1.2175  |
| C | 0.06527  | 1.30923  | -4.79527 |
| C | 0.074    | -1.49331 | -4.98565 |
| C | -0.98637 | 0.63345  | -5.40781 |
| C | 1.18765  | 0.57277  | -4.43547 |
| C | 1.19169  | -0.80333 | -4.52905 |
| C | -0.98199 | -0.74826 | -5.50244 |
| H | -1.84136 | 1.18247  | -5.75113 |
| H | 2.01137  | 1.06515  | -3.95953 |
| H | 2.01657  | -1.35028 | -4.11983 |
| H | -1.83519 | -1.25105 | -5.9144  |
| C | -0.04744 | -5.06857 | -2.7481  |

|   |          |          |          |
|---|----------|----------|----------|
| C | -0.06655 | -2.91809 | -4.55257 |
| C | -1.1936  | -4.30421 | -2.93729 |
| C | 1.01362  | -4.86894 | -3.62817 |
| C | 1.00518  | -3.80659 | -4.51637 |
| C | -1.20344 | -3.24812 | -3.82463 |
| H | -2.02872 | -4.43448 | -2.27982 |
| H | 1.8871   | -5.4874  | -3.55695 |
| H | 1.87146  | -3.61842 | -5.12024 |
| H | -2.04715 | -2.58832 | -3.83649 |
| H | 0.31386  | 7.59431  | 2.13327  |

|                                              |                             |
|----------------------------------------------|-----------------------------|
| Zero-point correction=                       | 0.644077 (Hartree/Particle) |
| Thermal correction to Energy=                | 0.679075                    |
| Thermal correction to Enthalpy=              | 0.680019                    |
| Thermal correction to Gibbs Free Energy=     | 0.578247                    |
| Sum of electronic and zero-point Energies=   | -1847.829588                |
| Sum of electronic and thermal Energies=      | -1847.794591                |
| Sum of electronic and thermal Enthalpies=    | -1847.793646                |
| Sum of electronic and thermal Free Energies= | -1847.895419                |

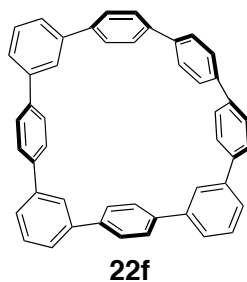

Charge = 0 Multiplicity = 1

|   |          |          |          |
|---|----------|----------|----------|
| C | -6.96062 | -1.52404 | -0.45097 |
| C | -7.59747 | -0.28597 | -0.59705 |
| C | -6.9192  | 0.91217  | -0.35105 |
| C | -5.57735 | 0.88993  | 0.06414  |
| C | -4.96512 | -0.36128 | 0.23011  |
| C | -5.62504 | -1.57298 | -0.02655 |
| C | -4.7869  | -2.80136 | 0.08123  |
| C | -4.72786 | 2.0999   | 0.24012  |
| C | -3.74938 | 2.12731  | 1.25075  |
| C | -2.76102 | 3.10567  | 1.27092  |
| C | -2.7153  | 4.11218  | 0.29073  |
| C | -3.76201 | 4.16052  | -0.64432 |
| C | -4.74812 | 3.16908  | -0.67187 |



|   |          |          |          |
|---|----------|----------|----------|
| C | -1.50449 | 4.97431  | 0.18032  |
| C | -1.53081 | 6.37601  | 0.11986  |
| C | -0.33427 | 7.09243  | 0.01003  |
| C | 0.89714  | 6.43384  | -0.06592 |
| C | 0.94739  | 5.0311   | -0.03609 |
| C | -0.26066 | 4.33026  | 0.10406  |
| C | 2.20047  | 4.23827  | -0.17061 |
| C | 2.20252  | 3.114    | -1.0151  |
| C | 3.2814   | 2.23968  | -1.04602 |
| C | 4.412    | 2.44539  | -0.23477 |
| C | 4.45349  | 3.61728  | 0.53843  |
| C | 3.366    | 4.49839  | 0.5699   |
| C | 5.43197  | 1.36277  | -0.15506 |
| C | 6.81992  | 1.55225  | -0.25016 |
| C | 7.67984  | 0.44886  | -0.22241 |
| C | 7.18569  | -0.85622 | -0.098   |
| C | 5.80613  | -1.0658  | 0.02805  |
| C | 4.95933  | 0.05206  | 0.00267  |
| C | -4.02479 | -3.01369 | 1.24219  |
| C | -2.93547 | -3.87901 | 1.23784  |
| C | -2.55623 | -4.56511 | 0.0686   |
| C | -3.42915 | -4.49105 | -1.03281 |
| C | -4.52512 | -3.62445 | -1.02722 |
| C | -1.15287 | -5.04691 | -0.03735 |
| C | -0.42044 | -5.49558 | 1.07906  |
| C | 0.97218  | -5.43969 | 1.09531  |
| C | 1.69147  | -4.93509 | -0.00521 |
| C | 0.96812  | -4.70306 | -1.18917 |
| C | -0.42342 | -4.75701 | -1.20476 |
| C | 3.04741  | -4.33763 | 0.13004  |
| C | 3.94612  | -4.21744 | -0.94595 |
| C | 4.95945  | -3.25468 | -0.9335  |
| C | 5.10731  | -2.38101 | 0.15633  |
| C | 4.33005  | -2.62663 | 1.29962  |
| C | 3.32464  | -3.58931 | 1.28948  |
| H | -7.50194 | -2.44318 | -0.6572  |
| H | -8.63794 | -0.25495 | -0.90839 |
| H | -7.43497 | 1.86024  | -0.47559 |
| H | -3.91298 | -0.39704 | 0.49036  |
| H | -3.74503 | 1.35308  | 2.01204  |
| H | -1.99523 | 3.07785  | 2.04085  |
| H | -3.75879 | 4.92984  | -1.41177 |
| H | -5.48997 | 3.18239  | -1.46554 |
| H | -2.47807 | 6.90445  | 0.18166  |

|   |          |          |          |
|---|----------|----------|----------|
| H | -0.3626  | 8.17797  | -0.02489 |
| H | 1.81264  | 7.00715  | -0.18199 |
| H | -0.23474 | 3.24603  | 0.14368  |
| H | 1.34102  | 2.9202   | -1.64701 |
| H | 3.24644  | 1.37372  | -1.70006 |
| H | 5.31189  | 3.80923  | 1.17668  |
| H | 3.40003  | 5.35988  | 1.23147  |
| H | 7.22532  | 2.55212  | -0.3786  |
| H | 8.75127  | 0.60664  | -0.30968 |
| H | 7.87034  | -1.69957 | -0.08257 |
| H | 3.89084  | -0.10903 | 0.10168  |
| H | -4.23646 | -2.42801 | 2.13233  |
| H | -2.30172 | -3.92731 | 2.1177   |
| H | -3.20601 | -5.05309 | -1.93552 |
| H | -5.11995 | -3.51279 | -1.9299  |
| H | -0.94592 | -5.81947 | 1.9732   |
| H | 1.50172  | -5.71955 | 2.00193  |
| H | 1.48439  | -4.33074 | -2.06869 |
| H | -0.94667 | -4.42462 | -2.09599 |
| H | 3.80328  | -4.82233 | -1.83723 |
| H | 5.57342  | -3.11517 | -1.81937 |
| H | 4.44971  | -1.98876 | 2.17087  |
| H | 2.66507  | -3.6672  | 2.14807  |

|                                              |                             |
|----------------------------------------------|-----------------------------|
| Zero-point correction=                       | 0.644441 (Hartree/Particle) |
| Thermal correction to Energy=                | 0.679747                    |
| Thermal correction to Enthalpy=              | 0.680692                    |
| Thermal correction to Gibbs Free Energy=     | 0.577267                    |
| Sum of electronic and zero-point Energies=   | -1847.870520                |
| Sum of electronic and thermal Energies=      | -1847.835214                |
| Sum of electronic and thermal Enthalpies=    | -1847.834269                |
| Sum of electronic and thermal Free Energies= | -1847.937694                |

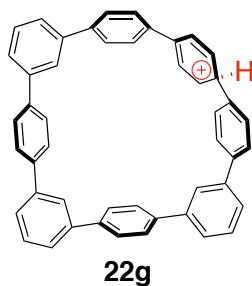

Charge = 1 Multiplicity = 1

|   |          |         |         |
|---|----------|---------|---------|
| C | -3.53407 | 4.07493 | 0.18417 |
|---|----------|---------|---------|

|   |          |          |          |
|---|----------|----------|----------|
| C | -6.11147 | 3.03357  | -0.05792 |
| C | -3.76776 | 2.71127  | 0.26962  |
| C | -4.61213 | 4.92469  | -0.01897 |
| C | -5.8906  | 4.40082  | -0.13135 |
| C | -5.04115 | 2.1769   | 0.14703  |
| H | -2.93564 | 2.0475   | 0.38768  |
| H | -4.45631 | 5.9834   | -0.08209 |
| H | -6.72101 | 5.0624   | -0.27814 |
| H | -7.10442 | 2.64117  | -0.15321 |
| C | -2.10897 | 4.51366  | 0.23578  |
| C | 0.66732  | 4.82806  | 0.12206  |
| C | -1.30615 | 4.11792  | 1.30006  |
| C | -1.51527 | 5.15563  | -0.84164 |
| C | -0.13954 | 5.31144  | -0.89812 |
| C | 0.06397  | 4.27167  | 1.24385  |
| H | -1.75858 | 3.66147  | 2.15792  |
| H | -2.11997 | 5.46816  | -1.66973 |
| H | 0.31049  | 5.74514  | -1.76926 |
| H | 0.6741   | 3.93602  | 2.05914  |
| C | -5.13038 | 0.68646  | 0.17153  |
| C | -4.68859 | -2.06901 | 0.05775  |
| C | -4.69014 | -0.00581 | 1.29373  |
| C | -5.4501  | -0.03124 | -0.97168 |
| C | -5.2298  | -1.3985  | -1.02931 |
| C | -4.47178 | -1.36693 | 1.23794  |
| H | -4.48149 | 0.53449  | 2.19553  |
| H | -5.79637 | 0.48909  | -1.84236 |
| H | -5.40598 | -1.92637 | -1.94581 |
| H | -4.09884 | -1.88422 | 2.10003  |
| C | -4.14567 | -3.45135 | -0.08405 |
| C | -2.89988 | -5.92389 | -0.47034 |
| C | -2.78464 | -3.60744 | 0.13154  |
| C | -4.88494 | -4.55509 | -0.4838  |
| C | -4.26259 | -5.78194 | -0.66575 |
| C | -2.15172 | -4.82702 | -0.0608  |
| H | -2.20652 | -2.74646 | 0.39822  |
| H | -5.93971 | -4.45918 | -0.64695 |
| H | -4.84466 | -6.63108 | -0.9622  |
| H | -2.43214 | -6.87758 | -0.61576 |
| C | -0.68009 | -4.8512  | 0.10949  |
| C | 2.09691  | -4.4436  | 0.26294  |
| C | 0.16651  | -5.35473 | -0.88306 |
| C | -0.11084 | -4.24284 | 1.23046  |
| C | 1.24167  | -4.04855 | 1.31089  |

|   |          |          |          |
|---|----------|----------|----------|
| C | 1.52011  | -5.14138 | -0.81831 |
| H | -0.25509 | -5.8506  | -1.73288 |
| H | -0.74658 | -3.90051 | 2.0199   |
| H | 1.62854  | -3.52805 | 2.15991  |
| H | 2.13184  | -5.5061  | -1.61642 |
| C | 3.45195  | -3.97367 | 0.24475  |
| C | 5.78816  | -2.29808 | 0.05911  |
| C | 4.20171  | -3.89842 | -0.98627 |
| C | 4.07156  | -3.45921 | 1.43463  |
| C | 5.16707  | -2.69613 | 1.35615  |
| C | 5.28451  | -3.11988 | -1.07712 |
| H | 3.83967  | -4.40853 | -1.85131 |
| H | 3.63765  | -3.67711 | 2.38514  |
| H | 5.60069  | -2.28548 | 2.24647  |
| C | 5.39904  | -0.80078 | -0.12799 |
| C | 4.58663  | 1.8749   | -0.22969 |
| C | 4.23969  | -0.4446  | -0.79711 |
| C | 6.17019  | 0.19004  | 0.45838  |
| C | 5.76441  | 1.51401  | 0.4138   |
| C | 3.84943  | 0.87609  | -0.85797 |
| H | 3.63441  | -1.18658 | -1.27405 |
| H | 7.07883  | -0.06231 | 0.97097  |
| H | 6.3522   | 2.26228  | 0.90615  |
| H | 2.96363  | 1.13746  | -1.39958 |
| C | 4.06787  | 3.27096  | -0.23041 |
| C | 2.96489  | 5.82848  | -0.30307 |
| C | 2.71378  | 3.47231  | -0.00534 |
| C | 4.87676  | 4.37261  | -0.47819 |
| C | 4.32266  | 5.64113  | -0.50797 |
| C | 2.14665  | 4.73767  | -0.048   |
| H | 2.07956  | 2.63297  | 0.19567  |
| H | 5.92247  | 4.24102  | -0.67425 |
| H | 4.95024  | 6.48738  | -0.70386 |
| H | 2.5462   | 6.81453  | -0.33324 |
| H | 5.79184  | -3.01238 | -2.01604 |
| H | 6.87002  | -2.36559 | 0.11574  |

|                                              |                             |
|----------------------------------------------|-----------------------------|
| Zero-point correction=                       | 0.656603 (Hartree/Particle) |
| Thermal correction to Energy=                | 0.692205                    |
| Thermal correction to Enthalpy=              | 0.693149                    |
| Thermal correction to Gibbs Free Energy=     | 0.589468                    |
| Sum of electronic and zero-point Energies=   | -1848.212506                |
| Sum of electronic and thermal Energies=      | -1848.176904                |
| Sum of electronic and thermal Enthalpies=    | -1848.175960                |
| Sum of electronic and thermal Free Energies= | -1848.279640                |

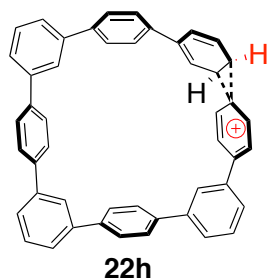

Charge = 1 Multiplicity = 1

|   |          |          |          |
|---|----------|----------|----------|
| C | -4.27847 | 3.41693  | -0.02416 |
| C | -6.66362 | 1.93378  | 0.23267  |
| C | -4.26609 | 2.0222   | 0.10219  |
| C | -5.51625 | 4.07325  | 0.01403  |
| C | -6.69299 | 3.32855  | 0.13522  |
| C | -5.43436 | 1.26189  | 0.23356  |
| H | -3.31194 | 1.50603  | 0.09201  |
| H | -5.56452 | 5.15392  | -0.08342 |
| H | -7.6492  | 3.84308  | 0.14887  |
| H | -7.58999 | 1.3757   | 0.33166  |
| C | -2.95302 | 4.07072  | -0.20169 |
| C | -0.2252  | 4.83846  | -0.27693 |
| C | -2.47046 | 5.09149  | 0.63127  |
| C | -2.07388 | 3.53328  | -1.15797 |
| C | -0.73923 | 3.90725  | -1.19459 |
| C | -1.12513 | 5.46918  | 0.59595  |
| H | -3.12986 | 5.53613  | 1.37093  |
| H | -2.44354 | 2.79175  | -1.85905 |
| H | -0.07852 | 3.4603   | -1.93165 |
| H | -0.75881 | 6.1996   | 1.31201  |
| C | -5.23525 | -0.21184 | 0.33962  |
| C | -4.23172 | -2.86149 | 0.22262  |
| C | -4.37062 | -0.70284 | 1.33201  |
| C | -5.69871 | -1.11196 | -0.63064 |
| C | -5.20028 | -2.41553 | -0.69087 |
| C | -3.88536 | -2.0022  | 1.27942  |
| H | -4.0477  | -0.03871 | 2.12821  |
| H | -6.37939 | -0.76421 | -1.4024  |
| H | -5.49734 | -3.0585  | -1.51441 |
| H | -3.19865 | -2.34693 | 2.04676  |
| C | -3.44772 | -4.1039  | -0.0033  |
| C | -1.76298 | -6.28574 | -0.62975 |
| C | -2.06125 | -4.04175 | 0.19872  |

|   |          |          |          |
|---|----------|----------|----------|
| C | -3.98281 | -5.30017 | -0.50536 |
| C | -3.14523 | -6.37703 | -0.80502 |
| C | -1.20618 | -5.106   | -0.11501 |
| H | -1.6255  | -3.10489 | 0.52796  |
| H | -5.05406 | -5.39123 | -0.65792 |
| H | -3.57586 | -7.29929 | -1.18301 |
| H | -1.12555 | -7.13018 | -0.87506 |
| C | 0.25251  | -4.86565 | 0.03254  |
| C | 2.9215   | -3.91844 | 0.16619  |
| C | 1.15509  | -5.09509 | -1.0213  |
| C | 0.74726  | -4.2558  | 1.19766  |
| C | 2.05722  | -3.79858 | 1.269    |
| C | 2.46131  | -4.6175  | -0.96351 |
| H | 0.80679  | -5.59181 | -1.92158 |
| H | 0.08281  | -4.11023 | 2.04308  |
| H | 2.38311  | -3.28152 | 2.16729  |
| H | 3.12191  | -4.77127 | -1.81207 |
| C | 4.18649  | -3.15043 | 0.16865  |
| C | 6.43344  | -1.3773  | 0.3787   |
| C | 4.62562  | -2.47878 | -0.944   |
| C | 4.94342  | -2.9921  | 1.39667  |
| C | 6.00869  | -2.14027 | 1.50753  |
| C | 5.71226  | -1.50552 | -0.87498 |
| H | 4.10172  | -2.5779  | -1.88839 |
| H | 4.6607   | -3.59862 | 2.25151  |
| H | 6.56774  | -2.06688 | 2.43373  |
| C | 5.27162  | -0.03005 | -0.29452 |
| C | 4.12965  | 2.54931  | -0.08369 |
| C | 5.9531   | 1.09978  | -0.80039 |
| C | 4.06345  | 0.15816  | 0.40649  |
| C | 3.51443  | 1.4166   | 0.50522  |
| C | 5.38516  | 2.36208  | -0.70014 |
| H | 6.89717  | 0.97742  | -1.32404 |
| H | 3.5457   | -0.68299 | 0.84999  |
| H | 2.58502  | 1.54034  | 1.04829  |
| H | 5.89076  | 3.20594  | -1.15722 |
| C | 3.42002  | 3.84098  | -0.07672 |
| C | 1.92148  | 6.21913  | -0.03636 |
| C | 2.01959  | 3.82503  | -0.17345 |
| C | 4.07106  | 5.08413  | 0.02109  |
| C | 3.31668  | 6.25586  | 0.05282  |
| C | 1.24901  | 4.99395  | -0.16802 |
| H | 1.50369  | 2.87695  | -0.27139 |
| H | 5.15139  | 5.13429  | 0.11678  |

|   |         |          |          |
|---|---------|----------|----------|
| H | 3.82052 | 7.21258  | 0.14749  |
| H | 1.35584 | 7.14588  | -0.02757 |
| H | 7.38283 | -0.85708 | 0.40763  |
| H | 6.25335 | -1.32371 | -1.79977 |

Imaginary frequency = -209.2856

|                                              |                             |
|----------------------------------------------|-----------------------------|
| Zero-point correction=                       | 0.655230 (Hartree/Particle) |
| Thermal correction to Energy=                | 0.690443                    |
| Thermal correction to Enthalpy=              | 0.691387                    |
| Thermal correction to Gibbs Free Energy=     | 0.588700                    |
| Sum of electronic and zero-point Energies=   | -1848.184464                |
| Sum of electronic and thermal Energies=      | -1848.149251                |
| Sum of electronic and thermal Enthalpies=    | -1848.148307                |
| Sum of electronic and thermal Free Energies= | -1848.250994                |

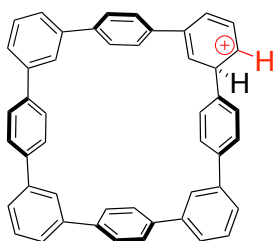

**22i**

Charge = 1 Multiplicity = 1

|   |          |         |          |
|---|----------|---------|----------|
| C | -4.52537 | 3.04216 | 0.06525  |
| C | -6.77793 | 1.41285 | 0.30422  |
| C | -4.41441 | 1.66133 | 0.08481  |
| C | -5.78499 | 3.61174 | 0.18081  |
| C | -6.89993 | 2.79545 | 0.29527  |
| C | -5.52191 | 0.83743 | 0.20505  |
| H | -3.44326 | 1.21564 | 0.01136  |
| H | -5.89668 | 4.67778 | 0.16447  |
| H | -7.87226 | 3.23934 | 0.37586  |
| H | -7.64821 | 0.79444 | 0.39835  |
| C | -3.24851 | 3.80342 | -0.06833 |
| C | -0.62778 | 4.77069 | -0.15247 |
| C | -2.76797 | 4.6233  | 0.94196  |
| C | -2.43299 | 3.54796 | -1.16562 |
| C | -1.14001 | 4.02341 | -1.20676 |
| C | -1.46711 | 5.10374 | 0.90034  |

|   |          |          |          |
|---|----------|----------|----------|
| H | -3.38534 | 4.83223  | 1.79308  |
| H | -2.80942 | 2.94815  | -1.96999 |
| H | -0.51281 | 3.79683  | -2.04618 |
| H | -1.08818 | 5.68336  | 1.71903  |
| C | -5.22635 | -0.62899 | 0.21576  |
| C | -4.0439  | -3.15344 | 0.06196  |
| C | -4.58232 | -1.17484 | 1.31916  |
| C | -5.36701 | -1.40189 | -0.9265  |
| C | -4.78015 | -2.65585 | -1.00326 |
| C | -3.99891 | -2.42292 | 1.24384  |
| H | -4.49704 | -0.59551 | 2.21688  |
| H | -5.86844 | -0.99494 | -1.78206 |
| H | -4.82886 | -3.21039 | -1.91963 |
| H | -3.46825 | -2.81733 | 2.08787  |
| C | -3.14021 | -4.32854 | -0.10741 |
| C | -1.26774 | -6.3552  | -0.52695 |
| C | -1.78243 | -4.09488 | 0.05906  |
| C | -3.55678 | -5.59648 | -0.48459 |
| C | -2.62195 | -6.6008  | -0.68566 |
| C | -0.84102 | -5.09028 | -0.14817 |
| H | -1.45633 | -3.10585 | 0.30994  |
| H | -4.60121 | -5.79944 | -0.61338 |
| H | -2.95158 | -7.58128 | -0.96582 |
| H | -0.5556  | -7.14106 | -0.68456 |
| C | 0.59306  | -4.70807 | -0.00875 |
| C | 3.15642  | -3.61556 | 0.15576  |
| C | 1.48116  | -4.82571 | -1.07067 |
| C | 1.02946  | -4.09633 | 1.16184  |
| C | 2.29379  | -3.55071 | 1.24264  |
| C | 2.75237  | -4.28296 | -0.99174 |
| H | 1.16114  | -5.3015  | -1.97556 |
| H | 0.36145  | -4.02149 | 1.99558  |
| H | 2.58874  | -3.03533 | 2.13686  |
| H | 3.41633  | -4.36387 | -1.83057 |
| C | 4.43757  | -2.85697 | 0.21198  |
| C | 6.77245  | -1.25907 | 0.58993  |
| C | 4.71106  | -1.8632  | -0.67586 |
| C | 5.36554  | -3.06538 | 1.24918  |
| C | 6.52302  | -2.28088 | 1.4361   |
| C | 5.86614  | -0.94453 | -0.53684 |
| H | 4.03756  | -1.66748 | -1.48722 |
| H | 5.17375  | -3.86642 | 1.938    |
| H | 7.18013  | -2.50273 | 2.25042  |
| C | 5.25437  | 0.48122  | -0.36568 |



|   |         |          |          |
|---|---------|----------|----------|
| C | 3.92258 | 2.91818  | -0.17653 |
| C | 5.42526 | 1.44127  | -1.34618 |
| C | 4.45468 | 0.7525   | 0.7345   |
| C | 3.79685 | 1.96085  | 0.82644  |
| C | 4.76597 | 2.65684  | -1.24632 |
| H | 6.04332 | 1.24625  | -2.2007  |
| H | 4.32684 | 0.02033  | 1.50739  |
| H | 3.16665 | 2.16355  | 1.66831  |
| H | 4.87473 | 3.38484  | -2.02455 |
| C | 3.07465 | 4.1442   | -0.13385 |
| C | 1.37044 | 6.33882  | -0.05827 |
| C | 1.69943 | 3.97488  | -0.14768 |
| C | 3.60088 | 5.427    | -0.0903  |
| C | 2.74521 | 6.51544  | -0.04642 |
| C | 0.83502 | 5.06058  | -0.11852 |
| H | 1.28849 | 2.98593  | -0.18653 |
| H | 4.66263 | 5.57465  | -0.07302 |
| H | 3.15143 | 7.50623  | -0.0056  |
| H | 0.71824 | 7.18897  | -0.03922 |
| H | 6.44089 | -0.93267 | -1.46345 |
| H | 7.63294 | -0.63182 | 0.71544  |

|                                              |                             |
|----------------------------------------------|-----------------------------|
| Zero-point correction=                       | 0.654669 (Hartree/Particle) |
| Thermal correction to Energy=                | 0.690732                    |
| Thermal correction to Enthalpy=              | 0.691676                    |
| Thermal correction to Gibbs Free Energy=     | 0.585765                    |
| Sum of electronic and zero-point Energies=   | -1848.193047                |
| Sum of electronic and thermal Energies=      | -1848.156984                |
| Sum of electronic and thermal Enthalpies=    | -1848.156040                |
| Sum of electronic and thermal Free Energies= | -1848.261951                |

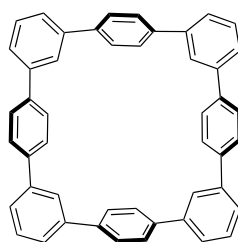**22j**

Charge = 0 Multiplicity = 1

|   |         |          |          |
|---|---------|----------|----------|
| C | 3.69251 | -5.65656 | -0.37126 |
| C | 2.82488 | -6.73699 | -0.56081 |

|   |          |          |          |
|---|----------|----------|----------|
| C | 1.44601  | -6.59797 | -0.37248 |
| C | 0.91405  | -5.3636  | 0.03274  |
| C | 1.80186  | -4.29684 | 0.23882  |
| C | 3.18512  | -4.41173 | 0.03362  |
| C | 3.9997   | -3.17291 | 0.16393  |
| C | -0.5404  | -5.07628 | 0.16324  |
| C | -1.46027 | -5.41459 | -0.84334 |
| C | -2.75415 | -4.88545 | -0.84292 |
| C | -3.17291 | -3.9997  | 0.16396  |
| C | -2.29256 | -3.76769 | 1.23572  |
| C | -1.00544 | -4.29417 | 1.2354   |
| C | -4.41173 | -3.18512 | 0.03366  |
| C | -5.65657 | -3.69251 | -0.37122 |
| C | -6.73699 | -2.82488 | -0.56076 |
| C | -6.59797 | -1.44601 | -0.37244 |
| C | -5.3636  | -0.91405 | 0.03277  |
| C | -4.29684 | -1.80185 | 0.23885  |
| C | -5.07628 | 0.5404   | 0.16326  |
| C | -5.4146  | 1.46026  | -0.84332 |
| C | -4.88546 | 2.75415  | -0.84292 |
| C | -3.9997  | 3.17291  | 0.16397  |
| C | -3.76768 | 2.29257  | 1.23572  |
| C | -4.29417 | 1.00545  | 1.23541  |
| C | -3.18512 | 4.41173  | 0.03365  |
| C | -3.69251 | 5.65656  | -0.37123 |
| C | -2.82488 | 6.73699  | -0.56078 |
| C | -1.44602 | 6.59797  | -0.37247 |
| C | -0.91405 | 5.3636   | 0.03274  |
| C | -1.80185 | 4.29684  | 0.23884  |
| C | 3.76769  | -2.29257 | 1.23569  |
| C | 4.29418  | -1.00545 | 1.23537  |
| C | 5.07628  | -0.5404  | 0.16321  |
| C | 5.41459  | -1.46027 | -0.84337 |
| C | 4.88545  | -2.75415 | -0.84296 |
| C | 5.3636   | 0.91405  | 0.03272  |
| C | 4.29684  | 1.80185  | 0.23881  |
| C | 4.41173  | 3.18512  | 0.03361  |
| C | 5.65656  | 3.69251  | -0.37127 |
| C | 6.73698  | 2.82488  | -0.56083 |
| C | 6.59797  | 1.44601  | -0.37251 |
| C | 3.17292  | 3.9997   | 0.16393  |
| C | 2.29257  | 3.76769  | 1.23569  |
| C | 1.00545  | 4.29417  | 1.23538  |
| C | 0.5404   | 5.07628  | 0.16323  |

|   |          |          |          |
|---|----------|----------|----------|
| C | 1.46026  | 5.41459  | -0.84336 |
| C | 2.75414  | 4.88545  | -0.84295 |
| H | 4.75995  | -5.78329 | -0.52883 |
| H | 3.22871  | -7.70029 | -0.8598  |
| H | 0.78789  | -7.44772 | -0.53097 |
| H | 1.39363  | -3.32315 | 0.48782  |
| H | -1.13487 | -6.02066 | -1.68442 |
| H | -3.41143 | -5.08948 | -1.68373 |
| H | -2.6126  | -3.13979 | 2.06217  |
| H | -0.33671 | -4.07073 | 2.06162  |
| H | -5.78329 | -4.75995 | -0.52877 |
| H | -7.7003  | -3.22871 | -0.85974 |
| H | -7.44772 | -0.78789 | -0.53094 |
| H | -3.32315 | -1.39362 | 0.48784  |
| H | -6.02067 | 1.13486  | -1.68439 |
| H | -5.08948 | 3.41143  | -1.68372 |
| H | -3.13978 | 2.61261  | 2.06217  |
| H | -4.07072 | 0.33672  | 2.06163  |
| H | -4.75996 | 5.78329  | -0.52878 |
| H | -3.22871 | 7.70029  | -0.85977 |
| H | -0.78789 | 7.44772  | -0.53097 |
| H | -1.39362 | 3.32315  | 0.48783  |
| H | 3.1398   | -2.61261 | 2.06214  |
| H | 4.07074  | -0.33672 | 2.0616   |
| H | 6.02066  | -1.13486 | -1.68445 |
| H | 5.08947  | -3.41143 | -1.68377 |
| H | 3.32316  | 1.39362  | 0.48781  |
| H | 5.78329  | 4.75995  | -0.52883 |
| H | 7.70029  | 3.22871  | -0.85982 |
| H | 7.44772  | 0.78789  | -0.53101 |
| H | 2.61262  | 3.13979  | 2.06214  |
| H | 0.33673  | 4.07073  | 2.06161  |
| H | 1.13486  | 6.02066  | -1.68443 |
| H | 3.41142  | 5.08947  | -1.68376 |

|                                              |                             |
|----------------------------------------------|-----------------------------|
| Zero-point correction=                       | 0.644884 (Hartree/Particle) |
| Thermal correction to Energy=                | 0.680135                    |
| Thermal correction to Enthalpy=              | 0.681080                    |
| Thermal correction to Gibbs Free Energy=     | 0.578240                    |
| Sum of electronic and zero-point Energies=   | -1847.894196                |
| Sum of electronic and thermal Energies=      | -1847.858945                |
| Sum of electronic and thermal Enthalpies=    | -1847.858001                |
| Sum of electronic and thermal Free Energies= | -1847.960840                |

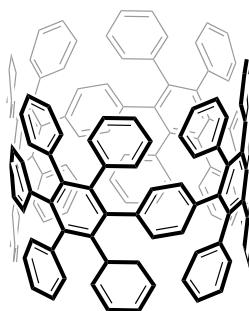

27

Charge = 0 Multiplicity = 1

|   |          |          |          |
|---|----------|----------|----------|
| C | -0.39217 | -5.05819 | -0.0545  |
| C | -3.10117 | -4.24387 | 0.12235  |
| C | -1.42411 | -5.99732 | -0.12149 |
| C | -0.73165 | -3.70274 | 0.11487  |
| C | -2.05346 | -3.30558 | 0.19973  |
| C | -2.77067 | -5.59236 | -0.03769 |
| H | -1.18928 | -7.04777 | -0.24133 |
| H | 0.0639   | -2.96862 | 0.17972  |
| H | -2.30112 | -2.25755 | 0.31939  |
| H | -3.55557 | -6.33461 | -0.11306 |
| C | 1.10196  | -5.25455 | -0.11655 |
| C | 3.74012  | -4.28188 | -0.08036 |
| C | 1.76857  | -4.99004 | -1.32889 |
| C | 1.85297  | -5.33915 | 1.0791   |
| C | 3.17751  | -4.84307 | 1.09776  |
| C | 3.10572  | -4.53437 | -1.32062 |
| C | -4.44346 | -3.54938 | 0.14109  |
| C | -5.79047 | -1.08791 | 0.04107  |
| C | -4.83426 | -2.91443 | 1.34034  |
| C | -5.04105 | -3.14038 | -1.07376 |
| C | -5.71056 | -1.89531 | -1.12454 |
| C | -5.53781 | -1.69294 | 1.29709  |
| C | 4.63357  | -3.07138 | 0.06148  |
| C | 5.66406  | -0.40903 | 0.10348  |
| C | 5.78822  | -2.73045 | -0.65611 |
| C | 4.05933  | -2.07116 | 0.874    |
| C | 4.55502  | -0.78306 | 0.89101  |
| C | 6.30187  | -1.42005 | -0.62854 |
| H | 6.26858  | -3.46622 | -1.28714 |
| H | 3.16821  | -2.30606 | 1.44025  |
| H | 4.04333  | -0.02362 | 1.46671  |
| H | 7.16803  | -1.1851  | -1.2327  |
| C | -5.66416 | 0.40916  | -0.10366 |

|   |          |         |          |
|---|----------|---------|----------|
| C | -4.63337 | 3.07137 | -0.06125 |
| C | -4.55499 | 0.78315 | -0.89102 |
| C | -6.30196 | 1.42018 | 0.62839  |
| C | -5.78812 | 2.73051 | 0.65619  |
| C | -4.05915 | 2.07118 | -0.87382 |
| H | -4.04332 | 0.02371 | -1.46673 |
| H | -7.16824 | 1.18528 | 1.23238  |
| H | -6.26847 | 3.46629 | 1.28724  |
| H | -3.16795 | 2.30607 | -1.43996 |
| C | 5.79022  | 1.08804 | -0.04138 |
| C | 4.44335  | 3.54959 | -0.14151 |
| C | 5.53735  | 1.6929  | -1.29744 |
| C | 5.71046  | 1.89554 | 1.12415  |
| C | 5.04104  | 3.14067 | 1.07331  |
| C | 4.83389  | 2.91443 | -1.34073 |
| C | 3.10112  | 4.2442  | -0.12267 |
| C | 0.3922   | 5.05872 | 0.05441  |
| C | 2.77074  | 5.59271 | 0.03744  |
| C | 2.05334  | 3.30599 | -0.20002 |
| C | 0.73157  | 3.70325 | -0.11505 |
| C | 1.4242   | 5.99777 | 0.12136  |
| H | 3.55569  | 6.3349  | 0.11279  |
| H | 2.3009   | 2.25795 | -0.31976 |
| H | 1.18947  | 7.04824 | 0.24125  |
| C | -3.73991 | 4.28182 | 0.08075  |
| C | -1.10193 | 5.25507 | 0.11666  |
| C | -3.10528 | 4.53403 | 1.3209   |
| C | -3.17762 | 4.8434  | -1.09735 |
| C | -1.85315 | 5.33961 | -1.07886 |
| C | -1.7683  | 4.99024 | 1.32906  |
| C | -1.05157 | 5.17333 | 2.63748  |
| C | 0.15203  | 5.52399 | 5.15207  |
| C | -0.20723 | 4.18644 | 3.16463  |
| C | -1.26884 | 6.34575 | 3.37347  |
| C | -0.66899 | 6.52163 | 4.62174  |
| C | 0.38471  | 4.35721 | 4.41815  |
| H | -0.02316 | 3.28417 | 2.59465  |
| H | -1.9228  | 7.10944 | 2.96985  |
| H | -0.85063 | 7.43093 | 5.18316  |
| H | 1.02459  | 3.58094 | 4.82222  |
| H | 0.60305  | 5.65105 | 6.12985  |
| C | -1.24882 | 5.97763 | -2.29553 |
| C | -0.15111 | 7.28492 | -4.53016 |
| C | -0.09952 | 5.47412 | -2.92287 |

|   |          |          |          |
|---|----------|----------|----------|
| C | -1.8402  | 7.14635  | -2.80335 |
| C | -1.29628 | 7.7941   | -3.91175 |
| C | 0.44388  | 6.12444  | -4.03312 |
| H | 0.37935  | 4.58327  | -2.54104 |
| H | -2.73116 | 7.53661  | -2.32676 |
| H | -1.76462 | 8.69549  | -4.29058 |
| H | 1.34078  | 5.72452  | -4.49009 |
| H | 0.274    | 7.79101  | -5.38957 |
| C | -3.9971  | 4.82437  | -2.34927 |
| C | -5.61307 | 4.81166  | -4.65349 |
| C | -3.49515 | 4.35218  | -3.57277 |
| C | -5.32087 | 5.29247  | -2.30177 |
| C | -6.12159 | 5.2883   | -3.44373 |
| C | -4.29835 | 4.34262  | -4.71229 |
| H | -2.47367 | 4.00007  | -3.63058 |
| H | -5.71428 | 5.66161  | -1.36236 |
| H | -7.14009 | 5.65529  | -3.3885  |
| H | -3.89747 | 3.96835  | -5.64725 |
| H | -6.2345  | 4.80452  | -5.54149 |
| C | -3.82669 | 4.32856  | 2.61611  |
| C | -5.08757 | 4.23241  | 5.1301   |
| C | -3.38526 | 3.43336  | 3.60116  |
| C | -4.92393 | 5.1583   | 2.90163  |
| C | -5.55587 | 5.10458  | 4.14536  |
| C | -4.00169 | 3.39666  | 4.85325  |
| H | -2.53751 | 2.79334  | 3.39861  |
| H | -5.25821 | 5.8634   | 2.14891  |
| H | -6.39713 | 5.75639  | 4.35159  |
| H | -3.62614 | 2.72382  | 5.61637  |
| H | -5.55905 | 4.208    | 6.10595  |
| C | -6.04721 | -1.07743 | 2.56698  |
| C | -7.17299 | 0.00287  | 4.90244  |
| C | -7.17918 | -1.66523 | 3.15384  |
| C | -5.48366 | 0.05555  | 3.16528  |
| C | -6.04943 | 0.59441  | 4.3227   |
| C | -7.73569 | -1.13339 | 4.31713  |
| H | -7.61571 | -2.54277 | 2.69174  |
| H | -4.623   | 0.53428  | 2.71597  |
| H | -5.61948 | 1.49112  | 4.74734  |
| H | -8.60775 | -1.60097 | 4.76004  |
| H | -7.60922 | 0.42658  | 5.79994  |
| C | -4.43171 | -3.52785 | 2.64515  |
| C | -3.7575  | -4.72015 | 5.10201  |
| C | -4.85637 | -4.83075 | 2.94929  |

|   |          |          |          |
|---|----------|----------|----------|
| C | -3.64901 | -2.83714 | 3.58205  |
| C | -3.31501 | -3.42839 | 4.80086  |
| C | -4.52362 | -5.42259 | 4.16833  |
| H | -5.4603  | -5.36853 | 2.22793  |
| H | -3.31195 | -1.83386 | 3.35733  |
| H | -2.71591 | -2.87964 | 5.51859  |
| H | -4.86815 | -6.42567 | 4.39229  |
| H | -3.51334 | -5.17082 | 6.05769  |
| C | -4.9963  | -4.04741 | -2.26778 |
| C | -5.03794 | -5.85173 | -4.42414 |
| C | -6.2121  | -4.5636  | -2.74722 |
| C | -3.80212 | -4.44606 | -2.88462 |
| C | -3.82553 | -5.34393 | -3.95516 |
| C | -6.23322 | -5.45627 | -3.8176  |
| H | -7.13734 | -4.25485 | -2.27623 |
| H | -2.8551  | -4.06807 | -2.52494 |
| H | -2.88927 | -5.6475  | -4.40735 |
| H | -7.18006 | -5.84498 | -4.17494 |
| H | -5.05268 | -6.55071 | -5.25268 |
| C | -6.28334 | -1.35814 | -2.3982  |
| C | -7.42741 | -0.31145 | -4.74695 |
| C | -7.58247 | -0.82273 | -2.3882  |
| C | -5.56794 | -1.36262 | -3.60667 |
| C | -6.13474 | -0.84099 | -4.76871 |
| C | -8.15004 | -0.3049  | -3.55224 |
| H | -8.14199 | -0.81927 | -1.46066 |
| H | -4.57051 | -1.78089 | -3.63478 |
| H | -5.56647 | -0.84644 | -5.6918  |
| H | -9.15422 | 0.10252  | -3.52618 |
| H | -7.86612 | 0.09248  | -5.65205 |
| C | 1.05188  | -5.17295 | -2.63737 |
| C | -0.15155 | -5.52297 | -5.15211 |
| C | 1.26879  | -6.34539 | -3.3734  |
| C | 0.20797  | -4.18569 | -3.16453 |
| C | -0.3839  | -4.35615 | -4.41813 |
| C | 0.66902  | -6.52096 | -4.62175 |
| H | 1.92242  | -7.10935 | -2.96975 |
| H | 0.02418  | -3.28339 | -2.5945  |
| H | -1.02346 | -3.57962 | -4.82221 |
| H | 0.85038  | -7.43029 | -5.18321 |
| H | -0.60249 | -5.64977 | -6.12996 |
| C | 3.82804  | -4.33018 | -2.61551 |
| C | 5.09152  | -4.2364  | -5.12832 |
| C | 4.92578  | -5.15999 | -2.89906 |

|   |          |          |          |
|---|----------|----------|----------|
| C | 3.38736  | -3.43622 | -3.60201 |
| C | 4.00508  | -3.40071 | -4.85351 |
| C | 5.559    | -5.10742 | -4.14218 |
| H | 5.25945  | -5.8642  | -2.14524 |
| H | 2.53924  | -2.79621 | -3.40106 |
| H | 3.63008  | -2.72885 | -5.61777 |
| H | 6.40065  | -5.75923 | -4.34684 |
| H | 5.56405  | -4.21286 | -6.10368 |
| C | 3.9967   | -4.82379 | 2.34986  |
| C | 5.61214  | -4.81054 | 4.65446  |
| C | 5.32049  | -5.29188 | 2.30278  |
| C | 3.49446  | -4.35133 | 3.57315  |
| C | 4.2974   | -4.34151 | 4.71285  |
| C | 6.12094  | -5.28744 | 3.44492  |
| H | 5.71412  | -5.66124 | 1.36356  |
| H | 2.47297  | -3.99922 | 3.63065  |
| H | 3.89629  | -3.96704 | 5.64763  |
| H | 7.13947  | -5.65443 | 3.39001  |
| H | 6.23337  | -4.80319 | 5.5426   |
| C | 1.24844  | -5.97712 | 2.29568  |
| C | 0.15041  | -7.28442 | 4.53017  |
| C | 1.83985  | -7.14573 | 2.80371  |
| C | 0.09893  | -5.47372 | 2.92275  |
| C | -0.44462 | -6.12404 | 4.03293  |
| C | 1.29578  | -7.79349 | 3.91204  |
| H | 2.73097  | -7.53591 | 2.32733  |
| H | -0.37997 | -4.58296 | 2.54077  |
| H | -1.34166 | -5.7242  | 4.48967  |
| H | 1.76416  | -8.69479 | 4.29101  |
| H | -0.27482 | -7.79051 | 5.38952  |
| C | 4.43108  | 3.52767  | -2.64556 |
| C | 3.7563   | 4.71961  | -5.10243 |
| C | 3.64818  | 2.83681  | -3.58218 |
| C | 4.85567  | 4.83053  | -2.94998 |
| C | 4.52264  | 5.42218  | -4.16904 |
| C | 3.31389  | 3.42789  | -4.801   |
| H | 3.3112   | 1.83355  | -3.35725 |
| H | 5.45975  | 5.36841  | -2.22883 |
| H | 4.86711  | 6.42523  | -4.39322 |
| H | 2.71463  | 2.87903  | -5.51851 |
| H | 3.51192  | 5.17013  | -6.05812 |
| C | 6.04641  | 1.07714  | -2.56734 |
| C | 7.1715   | -0.00352 | -4.90296 |
| C | 5.48277  | -0.05603 | -3.16521 |



|   |          |          |          |
|---|----------|----------|----------|
| C | 7.17813  | 1.66492  | -3.15469 |
| C | 7.73431  | 1.1329   | -4.31806 |
| C | 6.0482   | -0.59505 | -4.32272 |
| H | 4.62232  | -0.53476 | -2.7155  |
| H | 7.61473  | 2.54259  | -2.69291 |
| H | 8.60618  | 1.60047  | -4.76135 |
| H | 5.61823  | -1.49191 | -4.74703 |
| H | 7.60746  | -0.42735 | -5.80053 |
| C | 6.28326  | 1.35845  | 2.39783  |
| C | 7.42733  | 0.31189  | 4.74664  |
| C | 5.56785  | 1.36297  | 3.60628  |
| C | 7.5824   | 0.82306  | 2.38786  |
| C | 8.14996  | 0.3053   | 3.55194  |
| C | 6.13464  | 0.84141  | 4.76836  |
| H | 4.57041  | 1.78121  | 3.63436  |
| H | 8.14192  | 0.81956  | 1.46033  |
| H | 9.15416  | -0.1021  | 3.52591  |
| H | 5.56637  | 0.84689  | 5.69144  |
| H | 7.86604  | -0.09198 | 5.65177  |
| C | 4.99647  | 4.04781  | 2.26724  |
| C | 5.03847  | 5.85234  | 4.42343  |
| C | 3.80237  | 4.44683  | 2.884    |
| C | 6.21238  | 4.56375  | 2.74668  |
| C | 6.23368  | 5.45651  | 3.81698  |
| C | 3.82595  | 5.3448   | 3.95445  |
| H | 2.85527  | 4.06906  | 2.52429  |
| H | 7.13756  | 4.25471  | 2.27577  |
| H | 7.1806   | 5.84502  | 4.17432  |
| H | 2.88975  | 5.64865  | 4.40656  |
| H | 5.05335  | 6.5514   | 5.2519   |
| H | -0.06405 | 2.9692   | -0.17986 |

|                                              |                             |
|----------------------------------------------|-----------------------------|
| Zero-point correction=                       | 1.931339 (Hartree/Particle) |
| Thermal correction to Energy=                | 2.044732                    |
| Thermal correction to Enthalpy=              | 2.045676                    |
| Thermal correction to Gibbs Free Energy=     | 1.764975                    |
| Sum of electronic and zero-point Energies=   | -5543.278889                |
| Sum of electronic and thermal Energies=      | -5543.165497                |
| Sum of electronic and thermal Enthalpies=    | -5543.164552                |
| Sum of electronic and thermal Free Energies= | -5543.445253                |

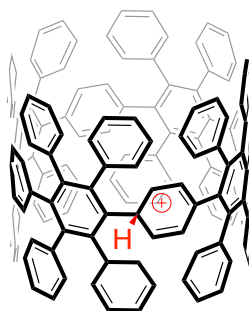**27b**

Charge = 1 Multiplicity = 1

|   |          |          |          |
|---|----------|----------|----------|
| C | -5.67492 | -1.47009 | 0.95287  |
| C | -3.48602 | -3.25307 | 0.81657  |
| C | -5.83463 | -2.74367 | 0.35219  |
| C | -4.49562 | -1.18533 | 1.67824  |
| C | -3.39909 | -2.07633 | 1.5919   |
| C | -4.73591 | -3.63651 | 0.28771  |
| C | -6.76304 | -0.36092 | 0.63156  |
| C | -5.70674 | 2.07206  | -0.57736 |
| C | -6.63455 | 0.92924  | 1.36501  |
| C | -6.71899 | -0.12626 | -0.84532 |
| C | -6.21736 | 1.00309  | -1.4001  |
| C | -6.16306 | 2.06788  | 0.78623  |
| H | -6.90253 | 0.95172  | 2.41333  |
| H | -7.06048 | -0.92959 | -1.48684 |
| H | -6.17232 | 1.08919  | -2.47464 |
| H | -6.00813 | 2.94006  | 1.40394  |
| C | -2.21648 | -4.00598 | 0.53772  |
| C | 0.44986  | -4.96312 | 0.21369  |
| C | -1.76335 | -5.13011 | 1.23747  |
| C | -1.3589  | -3.4525  | -0.4244  |
| C | -0.06284 | -3.91681 | -0.58035 |
| C | -0.45539 | -5.60651 | 1.07303  |
| H | -2.41354 | -5.61608 | 1.95863  |
| H | -1.69109 | -2.6016  | -1.01373 |
| H | 0.59509  | -3.40931 | -1.27567 |
| H | -0.1296  | -6.44984 | 1.67028  |
| C | -4.64903 | 2.98873  | -1.00107 |
| C | -2.07615 | 4.13894  | -0.86715 |
| C | -4.46415 | 4.26979  | -0.3735  |
| C | -3.59023 | 2.46088  | -1.81594 |
| C | -2.29931 | 3.00381  | -1.68578 |
| C | -3.17965 | 4.8468   | -0.32597 |
| C | 1.95101  | -5.04468 | 0.22437  |

|   |          |          |          |
|---|----------|----------|----------|
| C | 4.34463  | -3.61135 | 0.1569   |
| C | 2.66753  | -4.94299 | -0.99897 |
| C | 2.64885  | -4.81471 | 1.43724  |
| C | 3.84928  | -4.07518 | 1.39679  |
| C | 3.8835   | -4.22168 | -1.03362 |
| C | -0.65426 | 4.50676  | -0.56594 |
| C | 2.16818  | 4.63385  | -0.19186 |
| C | -0.0253  | 3.76272  | 0.44374  |
| C | 0.12704  | 5.41347  | -1.2905  |
| C | 1.5139   | 5.48307  | -1.10008 |
| C | 1.34655  | 3.82862  | 0.62512  |
| H | -0.6077  | 3.07497  | 1.05171  |
| H | -0.33236 | 6.03892  | -2.04981 |
| H | 2.08802  | 6.16534  | -1.71494 |
| H | 1.80532  | 3.18244  | 1.36346  |
| C | 4.22763  | 3.79314  | -1.37114 |
| C | 5.1478   | 2.83934  | 1.11943  |
| C | 3.62086  | 4.24722  | -0.17183 |
| C | 5.10207  | 2.68713  | -1.30986 |
| C | 5.38393  | 2.09147  | -0.06141 |
| C | 4.24609  | 3.9262   | 1.0648   |
| C | 4.92053  | -2.21659 | 0.12271  |
| C | 5.4328   | 0.5856   | 0.01598  |
| C | 3.88636  | -1.27394 | 0.27759  |
| C | 6.2149   | -1.72723 | -0.07782 |
| C | 6.46841  | -0.34193 | -0.1304  |
| C | 4.13403  | 0.08265  | 0.22208  |
| H | 2.87078  | -1.62662 | 0.4309   |
| H | 7.04151  | -2.41863 | -0.2063  |
| H | 7.4846   | 0.00191  | -0.29383 |
| H | 3.31014  | 0.78228  | 0.32778  |
| C | 3.86714  | 4.71669  | 2.27662  |
| C | 3.14263  | 6.29214  | 4.50179  |
| C | 3.50504  | 4.12033  | 3.49643  |
| C | 3.85513  | 6.11996  | 2.19845  |
| C | 3.50021  | 6.90003  | 3.29827  |
| C | 3.14488  | 4.89885  | 4.59441  |
| H | 3.50956  | 3.03971  | 3.58674  |
| H | 4.14067  | 6.59878  | 1.2669   |
| H | 3.5094   | 7.98296  | 3.21489  |
| H | 2.86895  | 4.41503  | 5.52703  |
| H | 2.87036  | 6.89726  | 5.36158  |
| C | 5.89054  | 2.49262  | 2.37782  |
| C | 7.42465  | 1.94652  | 4.67828  |

|   |          |         |          |
|---|----------|---------|----------|
| C | 6.81645  | 3.42888 | 2.86856  |
| C | 5.74813  | 1.27649 | 3.06299  |
| C | 6.50889  | 1.00865 | 4.20266  |
| C | 7.57479  | 3.16063 | 4.00625  |
| H | 6.9407   | 4.37341 | 2.34769  |
| H | 5.04318  | 0.53218 | 2.71227  |
| H | 6.38443  | 0.05637 | 4.70931  |
| H | 8.28635  | 3.89919 | 4.36389  |
| H | 8.01789  | 1.73383 | 5.56277  |
| C | 3.93355  | 4.46387 | -2.68095 |
| C | 3.47905  | 5.81789 | -5.10635 |
| C | 4.70715  | 5.57919 | -3.03725 |
| C | 2.92415  | 4.04279 | -3.55596 |
| C | 2.6995   | 4.71415 | -4.75766 |
| C | 4.48514  | 6.24944 | -4.24114 |
| H | 5.49144  | 5.91694 | -2.36607 |
| H | 2.29934  | 3.19866 | -3.28849 |
| H | 1.91125  | 4.3716  | -5.42187 |
| H | 5.09877  | 7.10692 | -4.5014  |
| H | 3.30503  | 6.33732 | -6.04409 |
| C | 5.6976   | 2.09035 | -2.54781 |
| C | 6.89878  | 1.04627 | -4.87016 |
| C | 7.08211  | 2.19619 | -2.75199 |
| C | 4.92806  | 1.43357 | -3.51807 |
| C | 5.52245  | 0.9206  | -4.67117 |
| C | 7.67851  | 1.68131 | -3.90324 |
| H | 7.68892  | 2.70146 | -2.00638 |
| H | 3.85922  | 1.32725 | -3.36875 |
| H | 4.90868  | 0.42663 | -5.41941 |
| H | 8.75041  | 1.78129 | -4.04605 |
| H | 7.35903  | 0.65333 | -5.7719  |
| C | -2.95488 | 6.21851 | 0.23745  |
| C | -2.5272  | 8.81379 | 1.22483  |
| C | -3.46699 | 7.33431 | -0.44086 |
| C | -2.21789 | 6.42167 | 1.41285  |
| C | -2.0108  | 7.71026 | 1.90514  |
| C | -3.25314 | 8.62235 | 0.04848  |
| H | -4.03533 | 7.19145 | -1.35507 |
| H | -1.79895 | 5.57192 | 1.9417   |
| H | -1.43888 | 7.85001 | 2.81735  |
| H | -3.65304 | 9.47552 | -0.49102 |
| H | -2.36127 | 9.81653 | 1.60637  |
| C | -1.17701 | 2.35633 | -2.4501  |
| C | 0.75334  | 0.982   | -3.96221 |

|   |          |          |          |
|---|----------|----------|----------|
| C | -1.00016 | 2.64188  | -3.81063 |
| C | -0.35483 | 1.39189  | -1.8521  |
| C | 0.60529  | 0.71034  | -2.60074 |
| C | -0.0463  | 1.95599  | -4.56281 |
| H | -1.62726 | 3.38908  | -4.28737 |
| H | -0.4717  | 1.16867  | -0.79653 |
| H | 1.23391  | -0.03469 | -2.12182 |
| H | 0.06556  | 2.17675  | -5.62007 |
| H | 1.48768  | 0.44021  | -4.55038 |
| C | -3.78947 | 1.34655  | -2.79835 |
| C | -4.15266 | -0.65894 | -4.73149 |
| C | -4.34393 | 1.65341  | -4.05128 |
| C | -3.40874 | 0.02517  | -2.53199 |
| C | -3.59355 | -0.97045 | -3.49089 |
| C | -4.5246  | 0.65744  | -5.01123 |
| H | -4.63222 | 2.67735  | -4.27226 |
| H | -2.9784  | -0.22666 | -1.56837 |
| H | -3.29327 | -1.99042 | -3.27038 |
| H | -4.95109 | 0.91094  | -5.97698 |
| H | -4.29045 | -1.43473 | -5.47824 |
| C | -5.66939 | 4.9813   | 0.13595  |
| C | -8.00944 | 6.26279  | 1.03792  |
| C | -6.81627 | 5.05039  | -0.67735 |
| C | -5.7176  | 5.57502  | 1.41103  |
| C | -6.87853 | 6.19905  | 1.85805  |
| C | -7.97279 | 5.69127  | -0.233   |
| H | -6.78907 | 4.62435  | -1.67539 |
| H | -4.8477  | 5.53499  | 2.05597  |
| H | -6.90134 | 6.64024  | 2.84972  |
| H | -8.84112 | 5.74589  | -0.88228 |
| H | -8.90884 | 6.75974  | 1.38787  |
| C | -4.39192 | -0.04983 | 2.65365  |
| C | -4.17463 | 1.97066  | 4.60334  |
| C | -5.09692 | -0.13812 | 3.86612  |
| C | -3.55591 | 1.05788  | 2.44865  |
| C | -3.4523  | 2.06036  | 3.41018  |
| C | -4.99585 | 0.86559  | 4.83047  |
| H | -5.72474 | -1.00544 | 4.05131  |
| H | -2.99495 | 1.13784  | 1.5235   |
| H | -2.80253 | 2.91228  | 3.23243  |
| H | -5.54936 | 0.77856  | 5.76058  |
| H | -4.08847 | 2.75033  | 5.35391  |
| C | -2.16583 | -1.77209 | 2.40014  |
| C | 0.02504  | -1.0502  | 4.0148   |

|   |           |          |          |
|---|-----------|----------|----------|
| C | -2.1393   | -2.10076 | 3.76274  |
| C | -1.06468  | -1.09846 | 1.85439  |
| C | 0.02193   | -0.73997 | 2.65369  |
| C | -1.05701  | -1.73929 | 4.56517  |
| H | -2.98224  | -2.62708 | 4.20026  |
| H | -1.05889  | -0.85038 | 0.79781  |
| H | 0.8645    | -0.21346 | 2.21438  |
| H | -1.06313  | -1.98938 | 5.62194  |
| H | 0.86417   | -0.76071 | 4.64001  |
| C | -4.89221  | -4.99914 | -0.31864 |
| C | -5.17654  | -7.57837 | -1.40053 |
| C | -5.66756  | -5.96807 | 0.33504  |
| C | -4.25697  | -5.34444 | -1.51985 |
| C | -4.40147  | -6.62279 | -2.05858 |
| C | -5.80731  | -7.24794 | -0.20037 |
| H | -6.16243  | -5.71587 | 1.268    |
| H | -3.63935  | -4.61287 | -2.03088 |
| H | -3.90204  | -6.87271 | -2.98981 |
| H | -6.40809  | -7.98673 | 0.32155  |
| H | -5.28547  | -8.57467 | -1.81811 |
| C | -7.16481  | -3.16382 | -0.20072 |
| C | -9.68319  | -3.96273 | -1.17671 |
| C | -8.26356  | -3.29783 | 0.66426  |
| C | -7.3501   | -3.44679 | -1.56346 |
| C | -8.59819  | -3.83926 | -2.04665 |
| C | -9.51165  | -3.69428 | 0.18161  |
| H | -8.12966  | -3.11319 | 1.72718  |
| H | -6.50837  | -3.36698 | -2.24425 |
| H | -8.72115  | -4.05533 | -3.1036  |
| H | -10.34569 | -3.80158 | 0.86859  |
| H | -10.65255 | -4.27348 | -1.55372 |
| C | 4.69538   | -4.11427 | -2.2906  |
| C | 6.30116   | -4.04048 | -4.60325 |
| C | 4.93101   | -2.90458 | -2.96007 |
| C | 5.28152   | -5.28484 | -2.79995 |
| C | 6.07478   | -5.25015 | -3.94502 |
| C | 5.72705   | -2.87061 | -4.10644 |
| H | 4.49601   | -1.98362 | -2.5878  |
| H | 5.10979   | -6.2279  | -2.29008 |
| H | 6.51872   | -6.16796 | -4.31946 |
| H | 5.90445   | -1.92068 | -4.60043 |
| H | 6.92263   | -4.01008 | -5.49342 |
| C | 2.06595   | -5.55268 | -2.22577 |
| C | 0.8983    | -6.78191 | -4.48031 |

|   |         |          |          |
|---|---------|----------|----------|
| C | 1.91159 | -4.84977 | -3.43222 |
| C | 1.61942 | -6.88414 | -2.17548 |
| C | 1.04495 | -7.49417 | -3.28991 |
| C | 1.33243 | -5.45644 | -4.54495 |
| H | 2.25075 | -3.82199 | -3.50033 |
| H | 1.73628 | -7.44535 | -1.25348 |
| H | 0.71659 | -8.52764 | -3.22768 |
| H | 1.22341 | -4.8925  | -5.46702 |
| H | 0.45487 | -7.2557  | -5.35121 |
| C | 2.12001 | -5.32635 | 2.74586  |
| C | 1.20348 | -6.38765 | 5.18551  |
| C | 1.2151  | -4.61109 | 3.54081  |
| C | 2.55343 | -6.58485 | 3.18919  |
| C | 2.1015  | -7.11117 | 4.40021  |
| C | 0.76203 | -5.13729 | 4.75031  |
| H | 0.85352 | -3.64523 | 3.20637  |
| H | 3.25364 | -7.14994 | 2.58091  |
| H | 2.45237 | -8.08519 | 4.72846  |
| H | 0.06084 | -4.56604 | 5.3516   |
| H | 0.85163 | -6.79501 | 6.1288   |
| C | 4.59666 | -3.7063  | 2.6414   |
| C | 6.08329 | -3.07404 | 4.94875  |
| C | 4.05506 | -2.88439 | 3.64032  |
| C | 5.90293 | -4.19113 | 2.81306  |
| C | 6.63913 | -3.88213 | 3.95649  |
| C | 4.79054 | -2.57248 | 4.7838   |
| H | 3.05365 | -2.48635 | 3.52008  |
| H | 6.33521 | -4.82585 | 2.0452   |
| H | 7.64486 | -4.27512 | 4.07268  |
| H | 4.35116 | -1.94038 | 5.55048  |
| H | 6.65128 | -2.83863 | 5.84404  |
| H | -7.7406 | -0.80296 | 0.87464  |

|                                              |                             |
|----------------------------------------------|-----------------------------|
| Zero-point correction=                       | 1.943208 (Hartree/Particle) |
| Thermal correction to Energy=                | 2.056632                    |
| Thermal correction to Enthalpy=              | 2.057576                    |
| Thermal correction to Gibbs Free Energy=     | 1.777841                    |
| Sum of electronic and zero-point Energies=   | -5543.637155                |
| Sum of electronic and thermal Energies=      | -5543.523730                |
| Sum of electronic and thermal Enthalpies=    | -5543.522786                |
| Sum of electronic and thermal Free Energies= | -5543.802522                |

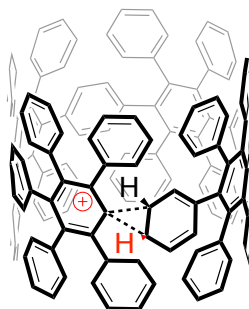**27c**

Charge = 1 Multiplicity = 1

|   |          |          |          |
|---|----------|----------|----------|
| C | 5.55448  | 1.17054  | -1.16536 |
| C | 4.94872  | 3.06423  | 0.87125  |
| C | 6.00207  | 0.97391  | 0.17971  |
| C | 4.55703  | 2.13762  | -1.35634 |
| C | 4.12973  | 2.96976  | -0.27828 |
| C | 5.89512  | 2.04221  | 1.11981  |
| C | 7.2228   | -0.55647 | 0.38303  |
| C | 5.13834  | -2.51156 | -0.08851 |
| C | 7.35194  | -1.54555 | -0.64714 |
| C | 5.96782  | -0.496   | 1.06871  |
| C | 4.93475  | -1.4679  | 0.77793  |
| C | 6.38172  | -2.50167 | -0.83017 |
| H | 8.26503  | -1.58659 | -1.22923 |
| H | 4.01859  | -1.40547 | 1.35184  |
| H | 6.5615   | -3.28957 | -1.55165 |
| H | 8.09634  | -0.07219 | 0.80007  |
| H | 5.96665  | -0.14238 | 2.09379  |
| C | 2.77877  | 3.60205  | -0.35049 |
| C | 0.07224  | 4.46362  | -0.28696 |
| C | 1.72125  | 2.67783  | -0.41523 |
| C | 2.45816  | 4.96517  | -0.27742 |
| C | 1.12259  | 5.38854  | -0.25677 |
| C | 0.40322  | 3.10022  | -0.37408 |
| H | 1.94146  | 1.61599  | -0.46269 |
| H | 3.24971  | 5.70553  | -0.23149 |
| H | 0.90373  | 6.45008  | -0.20499 |
| H | -0.39673 | 2.36666  | -0.40604 |
| C | 4.04743  | -3.54716 | -0.14307 |
| C | 1.40632  | -4.49282 | 0.04139  |
| C | 3.32368  | -3.81837 | -1.32976 |
| C | 3.55888  | -4.05073 | 1.09506  |
| C | 2.24304  | -4.55724 | 1.17988  |
| C | 1.98288  | -4.25992 | -1.22507 |



|   |          |          |          |
|---|----------|----------|----------|
| C | -1.40813 | 4.71749  | -0.21311 |
| C | -4.10655 | 3.96357  | -0.16502 |
| C | -2.18238 | 4.86489  | -1.38694 |
| C | -2.06243 | 4.55031  | 1.02492  |
| C | -3.43473 | 4.22258  | 1.05783  |
| C | -3.54514 | 4.48805  | -1.36337 |
| C | -5.08802 | 2.82553  | -0.24068 |
| C | -6.10605 | 0.14464  | -0.05404 |
| C | -6.12341 | 2.49246  | 0.64912  |
| C | -4.70952 | 1.81907  | -1.15255 |
| C | -5.20029 | 0.5313   | -1.06468 |
| C | -6.62251 | 1.18424  | 0.73926  |
| H | -6.516   | 3.23542  | 1.33241  |
| H | -3.93127 | 2.0217   | -1.87799 |
| H | -4.78374 | -0.22046 | -1.72296 |
| H | -7.37704 | 0.97598  | 1.4878   |
| C | -0.08952 | -4.4475  | 0.18881  |
| C | -2.88232 | -3.96345 | 0.44188  |
| C | -1.00082 | -5.50731 | 0.24693  |
| C | -0.59524 | -3.14043 | 0.27804  |
| C | -1.95435 | -2.90627 | 0.40094  |
| C | -2.37963 | -5.26801 | 0.3698   |
| H | -0.64344 | -6.53083 | 0.19172  |
| H | 0.09329  | -2.30022 | 0.2444   |
| H | -2.32084 | -1.88525 | 0.44317  |
| H | -3.06211 | -6.11124 | 0.39532  |
| C | -6.07902 | -1.33111 | 0.23287  |
| C | -4.30233 | -3.46677 | 0.4819   |
| C | -5.95733 | -2.26092 | -0.83625 |
| C | -5.7037  | -1.76461 | 1.53445  |
| C | -4.7518  | -2.79699 | 1.6432   |
| C | -5.06742 | -3.35276 | -0.70425 |
| C | 4.01254  | 2.4072   | -2.73029 |
| C | 3.04925  | 2.94408  | -5.31399 |
| C | 4.47133  | 3.52181  | -3.44506 |
| C | 3.05536  | 1.57241  | -3.32237 |
| C | 2.57349  | 1.84051  | -4.6035  |
| C | 3.99782  | 3.78511  | -4.73034 |
| H | 5.21068  | 4.17833  | -2.99629 |
| H | 2.68033  | 0.71346  | -2.77401 |
| H | 1.82907  | 1.18643  | -5.04776 |
| H | 4.37026  | 4.6476   | -5.2744  |
| H | 2.68343  | 3.14633  | -6.31609 |
| C | 6.67045  | 2.0131   | 2.39664  |

|   |          |         |          |
|---|----------|---------|----------|
| C | 8.1838   | 1.95771 | 4.76459  |
| C | 8.07309  | 2.08785 | 2.35359  |
| C | 6.03791  | 1.91386 | 3.64745  |
| C | 6.7909   | 1.87939 | 4.81987  |
| C | 8.82332  | 2.06745 | 3.52926  |
| H | 8.57372  | 2.2     | 1.3957   |
| H | 4.955    | 1.87131 | 3.69888  |
| H | 6.28787  | 1.79977 | 5.77844  |
| H | 9.90515  | 2.14294 | 3.47952  |
| H | 8.76698  | 1.93934 | 5.67985  |
| C | 4.81521  | 4.20736 | 1.83099  |
| C | 4.64807  | 6.39812 | 3.57846  |
| C | 5.85416  | 5.14801 | 1.89923  |
| C | 3.68864  | 4.38058 | 2.64676  |
| C | 3.60902  | 5.46861 | 3.51577  |
| C | 5.77145  | 6.23644 | 2.76668  |
| H | 6.72849  | 5.02643 | 1.26657  |
| H | 2.86447  | 3.6765  | 2.5962   |
| H | 2.72403  | 5.59154 | 4.13116  |
| H | 6.58236  | 6.95749 | 2.80449  |
| H | 4.58058  | 7.24632 | 4.25285  |
| C | -1.55631 | 5.46376 | -2.61264 |
| C | -0.40947 | 6.70223 | -4.86762 |
| C | -1.96639 | 6.74374 | -3.01859 |
| C | -0.55928 | 4.81644 | -3.35666 |
| C | 0.0071   | 5.43044 | -4.47479 |
| C | -1.39986 | 7.35762 | -4.1343  |
| H | -2.73977 | 7.25562 | -2.45415 |
| H | -0.2247  | 3.82617 | -3.0661  |
| H | 0.77862  | 4.91016 | -5.03441 |
| H | -1.7331  | 8.34807 | -4.43013 |
| H | 0.03197  | 7.17905 | -5.73787 |
| C | -4.41608 | 4.58219 | -2.57601 |
| C | -6.13642 | 4.79586 | -4.80003 |
| C | -5.6763  | 5.1929  | -2.46089 |
| C | -4.038   | 4.07884 | -3.83167 |
| C | -4.88959 | 4.18151 | -4.92949 |
| C | -6.52659 | 5.30188 | -3.56011 |
| H | -5.98466 | 5.59056 | -1.49894 |
| H | -3.07299 | 3.59825 | -3.94869 |
| H | -4.57875 | 3.77833 | -5.88896 |
| H | -7.49382 | 5.78254 | -3.44645 |
| H | -6.79763 | 4.8779  | -5.65748 |
| C | -1.3007  | 4.7279  | 2.30892  |

|   |          |          |          |
|---|----------|----------|----------|
| C | 0.01131  | 5.10006  | 4.77322  |
| C | -1.33849 | 5.96727  | 2.9633   |
| C | -0.57563 | 3.68343  | 2.90009  |
| C | 0.07168  | 3.86537  | 4.12301  |
| C | -0.69016 | 6.15335  | 4.18458  |
| H | -1.89741 | 6.78437  | 2.51739  |
| H | -0.53502 | 2.71707  | 2.40719  |
| H | 0.6081   | 3.03678  | 4.57782  |
| H | -0.7434  | 7.11787  | 4.68088  |
| H | 0.49675  | 5.23615  | 5.73553  |
| C | -4.15763 | 4.14987  | 2.36514  |
| C | -5.47664 | 4.22675  | 4.85186  |
| C | -5.13957 | 5.11864  | 2.63174  |
| C | -3.85941 | 3.21221  | 3.36276  |
| C | -4.50736 | 3.25576  | 4.5964   |
| C | -5.79569 | 5.1568   | 3.86215  |
| H | -5.37601 | 5.85445  | 1.86845  |
| H | -3.11132 | 2.4505   | 3.17368  |
| H | -4.24857 | 2.53213  | 5.36348  |
| H | -6.54864 | 5.91688  | 4.0488   |
| H | -5.978   | 4.25899  | 5.81453  |
| C | -6.73631 | -2.00475 | -2.08676 |
| C | -8.29217 | -1.4789  | -4.38119 |
| C | -8.10137 | -1.68669 | -1.98102 |
| C | -6.1683  | -2.05054 | -3.37121 |
| C | -6.93637 | -1.78853 | -4.50355 |
| C | -8.87194 | -1.42891 | -3.11368 |
| H | -8.55963 | -1.65024 | -0.99768 |
| H | -5.11644 | -2.28777 | -3.4846  |
| H | -6.4732  | -1.8247  | -5.48543 |
| H | -9.92584 | -1.19035 | -3.00423 |
| H | -8.8899  | -1.27845 | -5.26538 |
| C | -4.95694 | -4.40108 | -1.77119 |
| C | -4.86727 | -6.44412 | -3.70778 |
| C | -6.06494 | -5.23587 | -1.99152 |
| C | -3.80208 | -4.60996 | -2.53809 |
| C | -3.75971 | -5.62272 | -3.49795 |
| C | -6.02263 | -6.24619 | -2.95032 |
| H | -6.96612 | -5.08392 | -1.40536 |
| H | -2.93206 | -3.97975 | -2.38874 |
| H | -2.85353 | -5.76803 | -4.07754 |
| H | -6.89193 | -6.87905 | -3.10337 |
| H | -4.8311  | -7.23191 | -4.45454 |
| C | -4.21756 | -3.21238 | 2.98515  |

|   |          |          |          |
|---|----------|----------|----------|
| C | -3.31561 | -4.01605 | 5.52963  |
| C | -4.80962 | -4.29653 | 3.64884  |
| C | -3.15288 | -2.54953 | 3.61119  |
| C | -2.70723 | -2.94412 | 4.87344  |
| C | -4.36536 | -4.69489 | 4.90986  |
| H | -5.63288 | -4.82171 | 3.17391  |
| H | -2.67509 | -1.71459 | 3.10787  |
| H | -1.8912  | -2.40679 | 5.3492   |
| H | -4.84402 | -5.53181 | 5.40977  |
| H | -2.97791 | -4.31603 | 6.51748  |
| C | -6.34491 | -1.14991 | 2.73686  |
| C | -7.71071 | -0.14307 | 4.98636  |
| C | -7.7237  | -1.3703  | 2.90668  |
| C | -5.66791 | -0.40334 | 3.71037  |
| C | -6.34499 | 0.09095  | 4.82489  |
| C | -8.40136 | -0.8744  | 4.01961  |
| H | -8.25949 | -1.94959 | 2.16067  |
| H | -4.61071 | -0.19907 | 3.5903   |
| H | -5.80387 | 0.66625  | 5.5689   |
| H | -9.46503 | -1.06291 | 4.13195  |
| H | -8.23227 | 0.24243  | 5.85734  |
| C | 3.94105  | -3.69388 | -2.68882 |
| C | 4.95721  | -3.75004 | -5.31769 |
| C | 3.46091  | -2.80725 | -3.66384 |
| C | 4.9516   | -4.59955 | -3.05467 |
| C | 5.45953  | -4.62543 | -4.35424 |
| C | 3.95896  | -2.83891 | -4.96668 |
| H | 2.6667   | -2.11335 | -3.41071 |
| H | 5.30947  | -5.31738 | -2.32138 |
| H | 6.22919  | -5.34462 | -4.61801 |
| H | 3.55797  | -2.15708 | -5.71089 |
| H | 5.3323   | -3.78477 | -6.33612 |
| C | 1.18252  | -4.52344 | -2.47028 |
| C | -0.19556 | -5.04544 | -4.86569 |
| C | 1.35541  | -5.73956 | -3.14549 |
| C | 0.29126  | -3.58111 | -3.00162 |
| C | -0.38957 | -3.83778 | -4.19207 |
| C | 0.67295  | -5.99938 | -4.33399 |
| H | 2.03791  | -6.4811  | -2.74108 |
| H | 0.13396  | -2.64083 | -2.48292 |
| H | -1.07087 | -3.09377 | -4.59437 |
| H | 0.82333  | -6.94541 | -4.84541 |
| H | -0.71863 | -5.24102 | -5.79704 |
| C | 1.75297  | -5.21868 | 2.4346   |

|   |          |          |          |
|---|----------|----------|----------|
| C | 0.88534  | -6.58288 | 4.73664  |
| C | 2.3512   | -6.42843 | 2.82236  |
| C | 0.7085   | -4.70635 | 3.21692  |
| C | 0.28132  | -5.38336 | 4.36001  |
| C | 1.92223  | -7.10525 | 3.96245  |
| H | 3.15728  | -6.83972 | 2.22236  |
| H | 0.21748  | -3.78268 | 2.93078  |
| H | -0.53776 | -4.97553 | 4.94338  |
| H | 2.39567  | -8.0417  | 4.24224  |
| H | 0.54668  | -7.11013 | 5.62348  |
| C | 4.4573   | -4.04638 | 2.2946   |
| C | 6.19909  | -4.05923 | 4.50966  |
| C | 4.08848  | -3.43415 | 3.50306  |
| C | 5.71449  | -4.66726 | 2.22053  |
| C | 6.57648  | -4.67718 | 3.31708  |
| C | 4.9516   | -3.43766 | 4.59764  |
| H | 3.11518  | -2.96178 | 3.58794  |
| H | 6.009    | -5.16046 | 1.29858  |
| H | 7.53926  | -5.17403 | 3.24112  |
| H | 4.64585  | -2.96044 | 5.52409  |
| H | 6.8667   | -4.06901 | 5.36585  |
| C | 6.33893  | 0.65235  | -2.3328  |
| C | 7.96801  | -0.05662 | -4.51501 |
| C | 5.84173  | -0.16107 | -3.35442 |
| C | 7.66455  | 1.11835  | -2.42895 |
| C | 8.47175  | 0.76981  | -3.51043 |
| C | 6.65378  | -0.51846 | -4.43042 |
| H | 4.83126  | -0.54263 | -3.30245 |
| H | 8.05474  | 1.77541  | -1.65756 |
| H | 9.48729  | 1.14977  | -3.56936 |
| H | 6.25474  | -1.16856 | -5.20063 |
| H | 8.59156  | -0.33404 | -5.35931 |

Imaginary frequency = -313.0625

|                                              |                             |
|----------------------------------------------|-----------------------------|
| Zero-point correction=                       | 1.941683 (Hartree/Particle) |
| Thermal correction to Energy=                | 2.054891                    |
| Thermal correction to Enthalpy=              | 2.055835                    |
| Thermal correction to Gibbs Free Energy=     | 1.777650                    |
| Sum of electronic and zero-point Energies=   | -5543.599551                |
| Sum of electronic and thermal Energies=      | -5543.486344                |
| Sum of electronic and thermal Enthalpies=    | -5543.485399                |
| Sum of electronic and thermal Free Energies= | -5543.763585                |

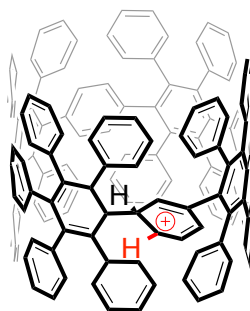**27d**

Charge = 1 Multiplicity = 1

|   |          |          |          |
|---|----------|----------|----------|
| C | 5.11019  | 2.50818  | -0.07098 |
| C | 5.93375  | -0.23857 | -0.28321 |
| C | 6.1595   | 1.99598  | 0.70744  |
| C | 4.59322  | 1.65126  | -1.06201 |
| C | 4.98548  | 0.33202  | -1.1609  |
| C | 6.56739  | 0.65747  | 0.59959  |
| H | 6.63844  | 2.62214  | 1.45223  |
| H | 3.79158  | 2.00204  | -1.70156 |
| H | 4.46932  | -0.2981  | -1.87264 |
| H | 7.35152  | 0.31038  | 1.26009  |
| C | 4.25251  | 3.71841  | 0.16265  |
| C | 1.67596  | 4.8127   | 0.17847  |
| C | 3.80686  | 4.47761  | -0.95304 |
| C | 3.57772  | 3.87802  | 1.39838  |
| C | 2.27658  | 4.42033  | 1.40015  |
| C | 2.50277  | 5.02303  | -0.94985 |
| C | 5.86344  | -1.73913 | -0.22065 |
| C | 3.97929  | -3.78426 | -0.07298 |
| C | 5.66997  | -2.40622 | 1.02073  |
| C | 5.53778  | -2.46576 | -1.40574 |
| C | 4.5721   | -3.49257 | -1.32902 |
| C | 4.69352  | -3.42588 | 1.09354  |
| C | 0.19006  | 4.63211  | 0.03845  |
| C | -2.49988 | 3.81357  | -0.40315 |
| C | -0.78792 | 5.5482   | -0.37148 |
| C | -0.21849 | 3.30163  | 0.24955  |
| C | -1.52588 | 2.90223  | 0.03427  |
| C | -2.11522 | 5.14548  | -0.5877  |
| H | -0.51668 | 6.58393  | -0.54588 |
| H | 0.51962  | 2.56833  | 0.55584  |
| H | -1.80043 | 1.86185  | 0.18891  |
| H | -2.84432 | 5.87967  | -0.9161  |
| C | 2.51551  | -4.12185 | 0.01391  |

|   |          |          |          |
|---|----------|----------|----------|
| C | -0.31565 | -4.21709 | 0.3151   |
| C | 1.70204  | -3.01405 | -0.29715 |
| C | 1.8762   | -5.28636 | 0.45522  |
| C | 0.48021  | -5.33259 | 0.60175  |
| C | 0.3243   | -3.05937 | -0.15299 |
| H | 2.17469  | -2.09499 | -0.62963 |
| H | 2.46428  | -6.16259 | 0.70713  |
| H | 0.01778  | -6.24784 | 0.95858  |
| H | -0.26721 | -2.17773 | -0.38572 |
| C | -3.84572 | 3.18672  | -0.63937 |
| C | -5.85707 | 1.24948  | -0.79616 |
| C | -4.10952 | 2.55361  | -1.87495 |
| C | -4.75498 | 3.03662  | 0.43091  |
| C | -5.76391 | 2.04798  | 0.35981  |
| C | -5.12704 | 1.57581  | -1.95946 |
| C | -6.50596 | -0.15834 | -0.72063 |
| C | -6.91412 | -2.38103 | 1.01952  |
| C | -7.77088 | -0.35863 | 0.00227  |
| C | -5.46394 | -1.16854 | -0.42124 |
| C | -5.64222 | -2.25883 | 0.40304  |
| C | -7.95393 | -1.45519 | 0.81741  |
| H | -8.59007 | 0.32117  | -0.1961  |
| H | -4.50746 | -1.02746 | -0.91307 |
| H | -8.90668 | -1.61364 | 1.31029  |
| H | -7.10132 | -3.23439 | 1.6622   |
| C | -1.8063  | -4.09717 | 0.48396  |
| C | -4.46101 | -3.17706 | 0.57291  |
| C | -2.33599 | -3.59003 | 1.69121  |
| C | -2.66662 | -4.32932 | -0.61364 |
| C | -4.00192 | -3.87726 | -0.56639 |
| C | -3.67252 | -3.12709 | 1.74029  |
| C | -4.24238 | -2.59838 | 3.02081  |
| C | -5.2466  | -1.74783 | 5.51172  |
| C | -3.78031 | -1.4136  | 3.61317  |
| C | -5.22526 | -3.34216 | 3.69523  |
| C | -5.72539 | -2.92111 | 4.92909  |
| C | -4.27398 | -0.9947  | 4.84868  |
| H | -3.01014 | -0.83288 | 3.11665  |
| H | -5.56177 | -4.28407 | 3.26994  |
| H | -6.47133 | -3.52077 | 5.44213  |
| H | -3.89145 | -0.0836  | 5.29907  |
| H | -5.61679 | -1.42878 | 6.4814   |
| C | -4.97942 | -4.16204 | -1.66614 |
| C | -6.90674 | -4.72785 | -3.63928 |

|   |          |          |          |
|---|----------|----------|----------|
| C | -4.87619 | -3.6041  | -2.94759 |
| C | -6.06704 | -5.00729 | -1.39043 |
| C | -7.01945 | -5.29344 | -2.36822 |
| C | -5.83454 | -3.88172 | -3.92345 |
| H | -4.04366 | -2.95099 | -3.18463 |
| H | -6.15003 | -5.46005 | -0.40617 |
| H | -7.8449  | -5.96093 | -2.13896 |
| H | -5.7421  | -3.43173 | -4.90652 |
| H | -7.64626 | -4.94846 | -4.40295 |
| C | -2.17061 | -5.05257 | -1.83143 |
| C | -1.32575 | -6.42644 | -4.13264 |
| C | -1.52153 | -4.37215 | -2.87033 |
| C | -2.38215 | -6.43196 | -1.95727 |
| C | -1.95971 | -7.11495 | -3.09813 |
| C | -1.10762 | -5.05274 | -4.0155  |
| H | -1.34102 | -3.30494 | -2.78156 |
| H | -2.8844  | -6.9703  | -1.15887 |
| H | -2.12959 | -8.18431 | -3.17914 |
| H | -0.61735 | -4.50826 | -4.81734 |
| H | -1.00295 | -6.95664 | -5.02338 |
| C | -1.50378 | -3.51849 | 2.93878  |
| C | -0.12005 | -3.32045 | 5.37821  |
| C | -0.5956  | -2.47408 | 3.16143  |
| C | -1.68901 | -4.47511 | 3.94624  |
| C | -1.00243 | -4.37851 | 5.15657  |
| C | 0.08781  | -2.37319 | 4.37341  |
| H | -0.43099 | -1.7321  | 2.38648  |
| H | -2.3863  | -5.29191 | 3.78492  |
| H | -1.1632  | -5.12566 | 5.92796  |
| H | 0.77855  | -1.55093 | 4.53538  |
| H | 0.40329  | -3.23434 | 6.32571  |
| C | 4.45311  | -4.1794  | 2.36964  |
| C | 4.11517  | -5.70187 | 4.71347  |
| C | 5.4289   | -5.10439 | 2.7759   |
| C | 3.30261  | -4.03417 | 3.1555   |
| C | 3.13683  | -4.79021 | 4.31755  |
| C | 5.26477  | -5.8565  | 3.93751  |
| H | 6.32363  | -5.22786 | 2.17343  |
| H | 2.53142  | -3.33047 | 2.8603   |
| H | 2.23549  | -4.66537 | 4.90853  |
| H | 6.03354  | -6.56441 | 4.23337  |
| H | 3.98303  | -6.28821 | 5.61813  |
| C | 6.46311  | -2.01145 | 2.22128  |
| C | 8.07424  | -1.39462 | 4.45063  |



|   |         |          |          |
|---|---------|----------|----------|
| C | 7.86582 | -2.06944 | 2.1403   |
| C | 5.8852  | -1.63368 | 3.44248  |
| C | 6.68314 | -1.33224 | 4.54528  |
| C | 8.66474 | -1.76324 | 3.24142  |
| H | 8.32662 | -2.37234 | 1.20476  |
| H | 4.80542 | -1.58566 | 3.52926  |
| H | 6.21741 | -1.05179 | 5.48557  |
| H | 9.74594 | -1.81992 | 3.156    |
| H | 8.69193 | -1.16208 | 5.31287  |
| C | 6.18688 | -2.06257 | -2.69022 |
| C | 7.50973 | -1.28536 | -5.05927 |
| C | 7.57167 | -1.82061 | -2.70341 |
| C | 5.47993 | -1.90313 | -3.89482 |
| C | 6.13287 | -1.51754 | -5.06309 |
| C | 8.22687 | -1.43859 | -3.87297 |
| H | 8.13716 | -1.94326 | -1.78514 |
| H | 4.40993 | -2.07717 | -3.91562 |
| H | 5.56336 | -1.39607 | -5.98005 |
| H | 9.29849 | -1.26284 | -3.8561  |
| H | 8.01735 | -0.98805 | -5.97204 |
| C | 4.25908 | -4.3698  | -2.50843 |
| C | 3.8285  | -6.13875 | -4.66367 |
| C | 5.29889 | -5.17486 | -3.00609 |
| C | 2.99726 | -4.47292 | -3.11152 |
| C | 2.78742 | -5.3491  | -4.17841 |
| C | 5.08892 | -6.04731 | -4.0712  |
| H | 6.28101 | -5.10992 | -2.54845 |
| H | 2.17299 | -3.86822 | -2.75272 |
| H | 1.79975 | -5.41618 | -4.62412 |
| H | 5.91001 | -6.65806 | -4.43502 |
| H | 3.66066 | -6.81956 | -5.49299 |
| C | 4.73501 | 4.63154  | -2.11685 |
| C | 6.57305 | 4.94186  | -4.23193 |
| C | 6.03702 | 5.10452  | -1.88122 |
| C | 4.37538 | 4.31431  | -3.4363  |
| C | 5.28507 | 4.46508  | -4.48111 |
| C | 6.94572 | 5.26216  | -2.92642 |
| H | 6.33126 | 5.35659  | -0.86695 |
| H | 3.37923 | 3.94128  | -3.64629 |
| H | 4.98721 | 4.20646  | -5.49315 |
| H | 7.94472 | 5.63462  | -2.71943 |
| H | 7.27943 | 5.06148  | -5.04799 |
| C | 1.99964 | 5.82749  | -2.1126  |
| C | 1.1005  | 7.43214  | -4.24274 |

|   |          |          |          |
|---|----------|----------|----------|
| C | 2.50143  | 7.12508  | -2.29663 |
| C | 1.03676  | 5.34895  | -3.01165 |
| C | 0.5918   | 6.14473  | -4.06798 |
| C | 2.05794  | 7.9205   | -3.35266 |
| H | 3.24966  | 7.5064   | -1.6083  |
| H | 0.6294   | 4.35145  | -2.88331 |
| H | -0.15791 | 5.75541  | -4.75    |
| H | 2.46116  | 8.92102  | -3.47882 |
| H | 0.75372  | 8.05038  | -5.06559 |
| C | 1.49782  | 4.5925   | 2.67003  |
| C | 0.0702   | 5.03544  | 5.06058  |
| C | 1.10719  | 5.88682  | 3.04996  |
| C | 1.14254  | 3.5225   | 3.50486  |
| C | 0.43686  | 3.74071  | 4.68758  |
| C | 0.40388  | 6.10865  | 4.23334  |
| H | 1.37365  | 6.7257   | 2.41408  |
| H | 1.42694  | 2.51296  | 3.23033  |
| H | 0.18281  | 2.89817  | 5.32496  |
| H | 0.12423  | 7.12045  | 4.51197  |
| H | -0.46234 | 5.20695  | 5.99185  |
| C | 4.2235   | 3.47911  | 2.69284  |
| C | 5.41235  | 2.8646   | 5.16652  |
| C | 4.89122  | 4.46556  | 3.43301  |
| C | 4.1727   | 2.17611  | 3.20474  |
| C | 4.75721  | 1.87377  | 4.43402  |
| C | 5.48159  | 4.16243  | 4.66043  |
| H | 4.9392   | 5.47844  | 3.04409  |
| H | 3.68222  | 1.39488  | 2.6319   |
| H | 4.70823  | 0.85971  | 4.81591  |
| H | 5.99241  | 4.94084  | 5.21963  |
| H | 5.86852  | 2.62566  | 6.12264  |
| C | -5.43787 | 0.88899  | -3.25337 |
| C | -6.09422 | -0.32714 | -5.71003 |
| C | -4.48586 | 0.13588  | -3.95905 |
| C | -6.73015 | 1.00962  | -3.79949 |
| C | -7.05617 | 0.40484  | -5.01466 |
| C | -4.80932 | -0.45907 | -5.17768 |
| H | -3.48058 | 0.03852  | -3.56436 |
| H | -7.47009 | 1.61401  | -3.28137 |
| H | -8.05449 | 0.52353  | -5.42468 |
| H | -4.05304 | -1.02174 | -5.71686 |
| H | -6.33981 | -0.78359 | -6.66391 |
| C | -3.33304 | 2.92402  | -3.10616 |
| C | -1.98321 | 3.56725  | -5.4873  |

|   |          |          |          |
|---|----------|----------|----------|
| C | -2.0404  | 2.43807  | -3.34707 |
| C | -3.93192 | 3.75     | -4.06749 |
| C | -3.26179 | 4.07215  | -5.24793 |
| C | -1.37345 | 2.75193  | -4.53158 |
| H | -1.55618 | 1.80978  | -2.60666 |
| H | -4.93137 | 4.13658  | -3.89106 |
| H | -3.7418  | 4.7127   | -5.9816  |
| H | -0.37727 | 2.35741  | -4.70902 |
| H | -1.46553 | 3.80558  | -6.41153 |
| C | -4.6568  | 3.92468  | 1.63675  |
| C | -4.52379 | 5.65385  | 3.84806  |
| C | -3.66033 | 3.76397  | 2.60855  |
| C | -5.58474 | 4.96575  | 1.78853  |
| C | -5.51986 | 5.82366  | 2.88587  |
| C | -3.59433 | 4.62329  | 3.70542  |
| H | -2.9213  | 2.97747  | 2.50064  |
| H | -6.35527 | 5.10935  | 1.0366   |
| H | -6.24325 | 6.62762  | 2.98413  |
| H | -2.80219 | 4.49493  | 4.43607  |
| H | -4.46844 | 6.32487  | 4.69994  |
| C | -6.71019 | 1.84515  | 1.50174  |
| C | -8.53793 | 1.50228  | 3.61134  |
| C | -6.32742 | 1.18169  | 2.67563  |
| C | -8.02113 | 2.35246  | 1.41094  |
| C | -8.92731 | 2.18442  | 2.45782  |
| C | -7.2373  | 1.0028   | 3.71628  |
| H | -5.31867 | 0.79622  | 2.77159  |
| H | -8.31847 | 2.89481  | 0.51739  |
| H | -9.93061 | 2.59132  | 2.37486  |
| H | -6.92598 | 0.4741   | 4.61098  |
| H | -9.23983 | 1.37052  | 4.42923  |
| H | -6.77784 | -0.38723 | -1.78412 |

|                                              |                             |
|----------------------------------------------|-----------------------------|
| Zero-point correction=                       | 1.941409 (Hartree/Particle) |
| Thermal correction to Energy=                | 2.055362                    |
| Thermal correction to Enthalpy=              | 2.056306                    |
| Thermal correction to Gibbs Free Energy=     | 1.774428                    |
| Sum of electronic and zero-point Energies=   | -5543.644913                |
| Sum of electronic and thermal Energies=      | -5543.530959                |
| Sum of electronic and thermal Enthalpies=    | -5543.530015                |
| Sum of electronic and thermal Free Energies= | -5543.811893                |

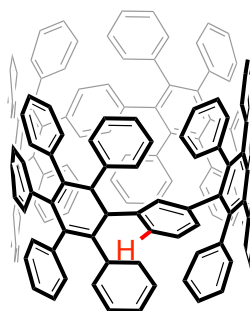

27e

Charge = 0 Multiplicity = 1

|   |          |          |          |
|---|----------|----------|----------|
| C | -5.38648 | -1.07825 | -0.06884 |
| C | -5.15915 | 1.75571  | 0.16122  |
| C | -6.49847 | -0.24816 | -0.2449  |
| C | -4.15895 | -0.45974 | 0.23619  |
| C | -4.0496  | 0.91133  | 0.35185  |
| C | -6.38592 | 1.15145  | -0.13168 |
| H | -7.46499 | -0.68073 | -0.48235 |
| H | -3.27543 | -1.07702 | 0.36596  |
| H | -3.08234 | 1.35283  | 0.57092  |
| H | -7.26745 | 1.76467  | -0.29039 |
| C | -5.19034 | -2.56679 | -0.21373 |
| C | -3.2203  | -4.5399  | -0.40156 |
| C | -4.85325 | -3.09024 | -1.48105 |
| C | -4.87745 | -3.33308 | 0.93738  |
| C | -3.87326 | -4.3223  | 0.84362  |
| C | -3.88094 | -4.11049 | -1.58032 |
| C | -4.7315  | 3.19999  | 0.25093  |
| C | -2.51036 | 4.88856  | 0.43133  |
| C | -4.32746 | 3.68656  | 1.51537  |
| C | -4.30276 | 3.88865  | -0.90814 |
| C | -3.17628 | 4.7381   | -0.81605 |
| C | -3.22652 | 4.56427  | 1.6117   |
| C | -1.74238 | -4.82086 | -0.41955 |
| C | 1.09585  | -4.57648 | -0.67223 |
| C | -1.01665 | -5.62819 | -1.30984 |
| C | -0.99135 | -3.96572 | 0.4137   |
| C | 0.38421  | -3.85421 | 0.29858  |
| C | 0.37379  | -5.49604 | -1.44238 |
| H | -1.53507 | -6.33493 | -1.94713 |
| H | -1.5079  | -3.33088 | 1.12406  |
| H | 0.91575  | -3.14882 | 0.93051  |
| H | 0.8871   | -6.09709 | -2.18719 |
| C | -1.00868 | 4.98244  | 0.45276  |
| C | 1.7832   | 4.41461  | 0.69738  |

|   |          |          |          |
|---|----------|----------|----------|
| C | -0.37132 | 4.02033  | -0.35774 |
| C | -0.18793 | 5.71803  | 1.32241  |
| C | 1.17938  | 5.42857  | 1.45055  |
| C | 0.98236  | 3.75263  | -0.24711 |
| H | -0.96592 | 3.42984  | -1.04468 |
| H | -0.6174  | 6.49399  | 1.94542  |
| H | 1.76572  | 5.98353  | 2.17687  |
| H | 1.42297  | 2.97378  | -0.86224 |
| C | 2.53408  | -4.16659 | -0.84491 |
| C | 4.92106  | -2.66745 | -0.67963 |
| C | 2.87445  | -3.27046 | -1.88024 |
| C | 3.48765  | -4.46261 | 0.15651  |
| C | 4.68954  | -3.7197  | 0.2352   |
| C | 4.07447  | -2.5284  | -1.8023  |
| C | 5.90478  | -1.56845 | -0.37989 |
| C | 7.5003   | 0.66339  | 0.28476  |
| C | 7.3006   | -1.66965 | -0.39113 |
| C | 5.33857  | -0.3359  | -0.02243 |
| C | 6.10688  | 0.78844  | 0.31495  |
| C | 8.08221  | -0.55856 | -0.06354 |
| H | 7.77615  | -2.61082 | -0.64827 |
| H | 4.25687  | -0.24853 | -0.00578 |
| H | 9.16477  | -0.64659 | -0.07978 |
| H | 8.12896  | 1.51483  | 0.52564  |
| C | 3.1681   | 3.84405  | 0.8535   |
| C | 5.31751  | 2.02867  | 0.63896  |
| C | 3.42745  | 2.93636  | 1.90236  |
| C | 4.11817  | 3.99224  | -0.18383 |
| C | 5.20533  | 3.09171  | -0.28544 |
| C | 4.50727  | 2.03091  | 1.79655  |
| C | 4.82529  | 1.09156  | 2.92269  |
| C | 5.4572   | -0.54677 | 5.1277   |
| C | 3.95124  | 0.07584  | 3.33726  |
| C | 6.03053  | 1.2563   | 3.62255  |
| C | 6.34433  | 0.44822  | 4.71533  |
| C | 4.26208  | -0.73343 | 4.42989  |
| H | 3.01781  | -0.07551 | 2.80671  |
| H | 6.7187   | 2.03695  | 3.31234  |
| H | 7.27891  | 0.60131  | 5.2475   |
| H | 3.5672   | -1.50906 | 4.73898  |
| H | 5.69256  | -1.17084 | 5.98494  |
| C | 6.2515   | 3.28164  | -1.34423 |
| C | 8.26425  | 3.69438  | -3.2682  |
| C | 6.42344  | 2.38097  | -2.40368 |

|   |          |         |          |
|---|----------|---------|----------|
| C | 7.10781  | 4.39089 | -1.2624  |
| C | 8.1061   | 4.59561 | -2.21419 |
| C | 7.41822  | 2.58886 | -3.35931 |
| H | 5.77679  | 1.51523 | -2.48635 |
| H | 6.98451  | 5.09808 | -0.44757 |
| H | 8.75853  | 5.46037 | -2.13199 |
| H | 7.52683  | 1.87894 | -4.17385 |
| H | 9.04012  | 3.85346 | -4.01174 |
| C | 3.92119  | 5.0755  | -1.1984  |
| C | 3.53765  | 7.1398  | -3.07432 |
| C | 3.75337  | 4.78604 | -2.5607  |
| C | 3.88871  | 6.41848 | -0.79389 |
| C | 3.7027   | 7.44206 | -1.72232 |
| C | 3.56129  | 5.80752 | -3.48926 |
| H | 3.77518  | 3.75298 | -2.89222 |
| H | 4.01838  | 6.65841 | 0.25728  |
| H | 3.68602  | 8.47564 | -1.3883  |
| H | 3.42904  | 5.5618  | -4.53906 |
| H | 3.39027  | 7.93564 | -3.79861 |
| C | 2.55224  | 2.87386 | 3.12079  |
| C | 1.06267  | 2.5794  | 5.49019  |
| C | 1.34573  | 2.15977 | 3.12269  |
| C | 2.98331  | 3.46355 | 4.31688  |
| C | 2.24484  | 3.32081 | 5.492    |
| C | 0.61251  | 2.00457 | 4.2993   |
| H | 0.99273  | 1.70951 | 2.19989  |
| H | 3.91717  | 4.01765 | 4.32838  |
| H | 2.60191  | 3.77602 | 6.41136  |
| H | -0.30574 | 1.42367 | 4.28954  |
| H | 0.49804  | 2.446   | 6.40846  |
| C | -2.84346 | 5.1536  | 2.93874  |
| C | -2.23415 | 6.37255 | 5.4015   |
| C | -3.53489 | 6.29796 | 3.36565  |
| C | -1.83918 | 4.63372 | 3.76424  |
| C | -1.53662 | 5.23815 | 4.98456  |
| C | -3.23624 | 6.90159 | 4.5875   |
| H | -4.31467 | 6.71206 | 2.73301  |
| H | -1.27665 | 3.76368 | 3.44575  |
| H | -0.74738 | 4.8203  | 5.60171  |
| H | -3.78592 | 7.78479 | 4.90057  |
| H | -1.99752 | 6.84157 | 6.35232  |
| C | -5.04664 | 3.18943 | 2.73065  |
| C | -6.47511 | 2.27987 | 4.98282  |
| C | -6.42124 | 3.44183 | 2.86381  |

|   |          |          |          |
|---|----------|----------|----------|
| C | -4.40472 | 2.45981  | 3.74218  |
| C | -5.11072 | 2.01008  | 4.85763  |
| C | -7.12921 | 2.99539  | 3.9792   |
| H | -6.931   | 4.00365  | 2.08672  |
| H | -3.34674 | 2.24051  | 3.65161  |
| H | -4.59306 | 1.45041  | 5.63161  |
| H | -8.19089 | 3.20857  | 4.0646   |
| H | -7.02264 | 1.93684  | 5.85604  |
| C | -5.05222 | 3.72304  | -2.19706 |
| C | -6.55069 | 3.52808  | -4.57369 |
| C | -5.76045 | 4.82844  | -2.69666 |
| C | -5.1098  | 2.51679  | -2.90997 |
| C | -5.85321 | 2.42235  | -4.08777 |
| C | -6.50078 | 4.73429  | -3.87331 |
| H | -5.72335 | 5.76849  | -2.15459 |
| H | -4.57439 | 1.64655  | -2.54667 |
| H | -5.89069 | 1.4751   | -4.61597 |
| H | -7.04035 | 5.60285  | -4.24031 |
| H | -7.12975 | 3.45062  | -5.48953 |
| C | -2.62019 | 5.44973  | -2.00943 |
| C | -1.562   | 6.87608  | -4.20007 |
| C | -2.36014 | 6.8274   | -1.91923 |
| C | -2.3357  | 4.80194  | -3.22253 |
| C | -1.8104  | 5.50627  | -4.30382 |
| C | -1.83965 | 7.5345   | -3.00221 |
| H | -2.5765  | 7.3447   | -0.98948 |
| H | -2.52536 | 3.73859  | -3.31904 |
| H | -1.59287 | 4.98205  | -5.23008 |
| H | -1.65074 | 8.60009  | -2.90811 |
| H | -1.15451 | 7.42397  | -5.04474 |
| C | -5.48277 | -2.49942 | -2.70327 |
| C | -6.73315 | -1.46782 | -5.00698 |
| C | -6.86832 | -2.62613 | -2.88979 |
| C | -4.73815 | -1.82848 | -3.68399 |
| C | -5.35599 | -1.32171 | -4.82708 |
| C | -7.48907 | -2.11722 | -4.03072 |
| H | -7.45556 | -3.14531 | -2.13798 |
| H | -3.66868 | -1.70797 | -3.55089 |
| H | -4.75919 | -0.81656 | -5.58147 |
| H | -8.5614  | -2.23397 | -4.15887 |
| H | -7.212   | -1.0794  | -5.90122 |
| C | -3.57278 | -4.73251 | -2.91199 |
| C | -3.11858 | -6.00011 | -5.38389 |
| C | -4.39361 | -5.78687 | -3.34159 |

|   |          |          |          |
|---|----------|----------|----------|
| C | -2.51808 | -4.32803 | -3.73907 |
| C | -2.29268 | -4.95669 | -4.96386 |
| C | -4.17195 | -6.41412 | -4.568   |
| H | -5.21344 | -6.11185 | -2.70739 |
| H | -1.85618 | -3.53209 | -3.4182  |
| H | -1.4634  | -4.62881 | -5.58286 |
| H | -4.82148 | -7.22603 | -4.88289 |
| H | -2.94191 | -6.48777 | -6.33838 |
| C | -3.42778 | -5.11628 | 2.03071  |
| C | -2.5882  | -6.69155 | 4.214    |
| C | -3.32174 | -6.51267 | 1.918    |
| C | -3.10014 | -4.52623 | 3.26249  |
| C | -2.68324 | -5.30447 | 4.34029  |
| C | -2.90983 | -7.29302 | 2.99729  |
| H | -3.5733  | -6.98576 | 0.97372  |
| H | -3.17053 | -3.45    | 3.37619  |
| H | -2.4302  | -4.82479 | 5.28155  |
| H | -2.84046 | -8.37137 | 2.88589  |
| H | -2.2656  | -7.29693 | 5.05611  |
| C | -5.65391 | -3.11849 | 2.20573  |
| C | -7.24426 | -2.84135 | 4.51884  |
| C | -6.48139 | -4.16577 | 2.6464   |
| C | -5.63979 | -1.9287  | 2.94948  |
| C | -6.42757 | -1.79407 | 4.09434  |
| C | -7.26667 | -4.03118 | 3.78928  |
| H | -6.50466 | -5.09306 | 2.08215  |
| H | -5.01196 | -1.10149 | 2.64171  |
| H | -6.40076 | -0.85927 | 4.6463   |
| H | -7.89872 | -4.85577 | 4.10687  |
| H | -7.85784 | -2.73265 | 5.40864  |
| C | 4.47753  | -1.62226 | -2.92893 |
| C | 5.23099  | -0.06043 | -5.15169 |
| C | 3.74748  | -0.4785  | -3.28477 |
| C | 5.60483  | -1.95463 | -3.69579 |
| C | 5.9786   | -1.18386 | -4.79695 |
| C | 4.11729  | 0.29243  | -4.38664 |
| H | 2.87777  | -0.1958  | -2.70205 |
| H | 6.18223  | -2.83591 | -3.43241 |
| H | 6.84946  | -1.46712 | -5.38135 |
| H | 3.53177  | 1.16869  | -4.65001 |
| H | 5.51212  | 0.53554  | -6.01508 |
| C | 1.96194  | -3.03834 | -3.04994 |
| C | 0.42264  | -2.42479 | -5.32472 |
| C | 0.87913  | -2.15184 | -2.96331 |



|   |          |          |          |
|---|----------|----------|----------|
| C | 2.24075  | -3.63578 | -4.28641 |
| C | 1.47716  | -3.33421 | -5.41475 |
| C | 0.12188  | -1.83964 | -4.09244 |
| H | 0.64387  | -1.69129 | -2.00869 |
| H | 3.079    | -4.32138 | -4.36739 |
| H | 1.71752  | -3.79792 | -6.36725 |
| H | -0.6957  | -1.1283  | -4.01272 |
| H | -0.15921 | -2.17167 | -6.20624 |
| C | 3.17886  | -5.53264 | 1.15763  |
| C | 2.57142  | -7.56784 | 3.00601  |
| C | 3.0725   | -5.25027 | 2.52745  |
| C | 2.9705   | -6.85295 | 0.73153  |
| C | 2.67417  | -7.86279 | 1.64626  |
| C | 2.76936  | -6.25712 | 3.44246  |
| H | 3.22873  | -4.23452 | 2.87604  |
| H | 3.04831  | -7.08676 | -0.32613 |
| H | 2.52163  | -8.87948 | 1.29528  |
| H | 2.68725  | -6.0166  | 4.49857  |
| H | 2.33756  | -8.3524  | 3.71975  |
| C | 5.72816  | -4.06853 | 1.26047  |
| C | 7.71579  | -4.78395 | 3.12004  |
| C | 6.0458   | -3.21979 | 2.32911  |
| C | 6.42516  | -5.28056 | 1.13694  |
| C | 7.41096  | -5.63543 | 2.05694  |
| C | 7.02873  | -3.57686 | 3.25245  |
| H | 5.52365  | -2.27661 | 2.44248  |
| H | 6.18771  | -5.9484  | 0.31423  |
| H | 7.93948  | -6.57771 | 1.94282  |
| H | 7.25393  | -2.90327 | 4.0739   |
| H | 8.48257  | -5.05955 | 3.83852  |

|                                              |                             |
|----------------------------------------------|-----------------------------|
| Zero-point correction=                       | 1.931147 (Hartree/Particle) |
| Thermal correction to Energy=                | 2.044673                    |
| Thermal correction to Enthalpy=              | 2.045617                    |
| Thermal correction to Gibbs Free Energy=     | 1.764399                    |
| Sum of electronic and zero-point Energies=   | -5543.314139                |
| Sum of electronic and thermal Energies=      | -5543.200614                |
| Sum of electronic and thermal Enthalpies=    | -5543.199669                |
| Sum of electronic and thermal Free Energies= | -5543.480887                |

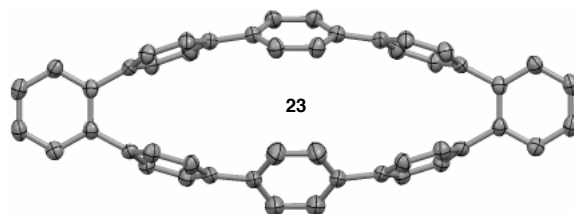

Charge = 0 Multiplicity = 1

|   |          |          |          |
|---|----------|----------|----------|
| H | 1.21529  | 4.08375  | -1.45731 |
| C | 0.69351  | 3.52389  | -0.70132 |
| C | -0.69133 | 2.1318   | 1.23057  |
| C | 1.41463  | 2.78524  | 0.23617  |
| C | -0.69351 | 3.52389  | -0.70132 |
| C | -1.41463 | 2.78524  | 0.23617  |
| C | 0.69133  | 2.1318   | 1.23057  |
| H | -1.21529 | 4.08375  | -1.45731 |
| H | 1.20836  | 1.5403   | 1.96338  |
| H | -1.20836 | 1.5403   | 1.96338  |
| C | 2.87861  | 2.52452  | 0.11653  |
| C | 5.48393  | 1.46485  | -0.09699 |
| C | 3.43676  | 2.23078  | -1.12554 |
| C | 3.69303  | 2.38613  | 1.23923  |
| C | 4.97144  | 1.86112  | 1.13399  |
| C | 4.71862  | 1.71468  | -1.22952 |
| H | 2.84118  | 2.32715  | -2.01529 |
| H | 3.31475  | 2.65094  | 2.2106   |
| H | 5.55641  | 1.71492  | 2.0251   |
| H | 5.09845  | 1.44289  | -2.19836 |
| C | 6.77509  | 0.70305  | -0.18845 |
| C | 9.19049  | -0.69234 | -0.33923 |
| C | 7.98801  | 1.37997  | -0.26325 |
| C | 6.77509  | -0.70305 | -0.18845 |
| C | 7.98801  | -1.37997 | -0.26325 |
| C | 9.19049  | 0.69234  | -0.33923 |
| H | 7.9867   | 2.45568  | -0.26248 |
| H | 7.9867   | -2.45568 | -0.26248 |
| H | 10.11667 | 1.23605  | -0.39793 |
| H | 10.11667 | -1.23605 | -0.39793 |
| C | 5.48393  | -1.46485 | -0.09699 |
| C | 2.87861  | -2.52452 | 0.11653  |
| C | 4.97144  | -1.86112 | 1.13399  |
| C | 4.71862  | -1.71468 | -1.22952 |
| C | 3.43676  | -2.23078 | -1.12554 |
| C | 3.69303  | -2.38613 | 1.23923  |

|   |           |          |          |
|---|-----------|----------|----------|
| H | 5.55641   | -1.71492 | 2.0251   |
| H | 5.09845   | -1.44289 | -2.19836 |
| H | 2.84118   | -2.32715 | -2.01529 |
| H | 3.31475   | -2.65094 | 2.2106   |
| C | 1.41463   | -2.78524 | 0.23617  |
| C | -1.41463  | -2.78524 | 0.23617  |
| C | 0.69133   | -2.1318  | 1.23057  |
| C | 0.69351   | -3.52389 | -0.70132 |
| C | -0.69351  | -3.52389 | -0.70132 |
| C | -0.69133  | -2.1318  | 1.23057  |
| H | 1.20836   | -1.5403  | 1.96338  |
| H | 1.21529   | -4.08375 | -1.45731 |
| H | -1.21529  | -4.08375 | -1.45731 |
| H | -1.20836  | -1.5403  | 1.96338  |
| C | -2.87861  | -2.52452 | 0.11653  |
| C | -5.48393  | -1.46485 | -0.09699 |
| C | -3.69303  | -2.38613 | 1.23923  |
| C | -3.43676  | -2.23078 | -1.12554 |
| C | -4.71862  | -1.71468 | -1.22952 |
| C | -4.97144  | -1.86112 | 1.13399  |
| H | -3.31475  | -2.65094 | 2.2106   |
| H | -2.84118  | -2.32715 | -2.01529 |
| H | -5.09845  | -1.44289 | -2.19836 |
| H | -5.55641  | -1.71492 | 2.0251   |
| C | -2.87861  | 2.52452  | 0.11653  |
| C | -5.48393  | 1.46485  | -0.09699 |
| C | -3.69303  | 2.38613  | 1.23923  |
| C | -3.43676  | 2.23078  | -1.12554 |
| C | -4.71862  | 1.71468  | -1.22952 |
| C | -4.97144  | 1.86112  | 1.13399  |
| H | -3.31475  | 2.65094  | 2.2106   |
| H | -2.84118  | 2.32715  | -2.01529 |
| H | -5.09845  | 1.44289  | -2.19836 |
| H | -5.55641  | 1.71492  | 2.0251   |
| C | -6.77509  | -0.70305 | -0.18845 |
| C | -9.19049  | 0.69234  | -0.33923 |
| C | -6.77509  | 0.70305  | -0.18845 |
| C | -7.98801  | -1.37997 | -0.26325 |
| C | -9.19049  | -0.69234 | -0.33923 |
| C | -7.98801  | 1.37997  | -0.26325 |
| H | -7.9867   | -2.45568 | -0.26248 |
| H | -10.11667 | -1.23605 | -0.39793 |
| H | -7.9867   | 2.45568  | -0.26248 |
| H | -10.11667 | 1.23605  | -0.39793 |

|                                              |                             |
|----------------------------------------------|-----------------------------|
| Zero-point correction=                       | 0.644125 (Hartree/Particle) |
| Thermal correction to Energy=                | 0.679749                    |
| Thermal correction to Enthalpy=              | 0.680693                    |
| Thermal correction to Gibbs Free Energy=     | 0.575672                    |
| Sum of electronic and zero-point Energies=   | -1847.880698                |
| Sum of electronic and thermal Energies=      | -1847.845074                |
| Sum of electronic and thermal Enthalpies=    | -1847.844130                |
| Sum of electronic and thermal Free Energies= | -1847.949151                |

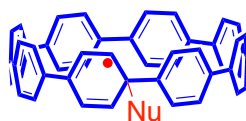

25

**Nu = H**

Charge = 0 Multiplicity = 2

|   |          |          |          |
|---|----------|----------|----------|
| H | 1.97913  | 4.40604  | -2.09818 |
| C | 2.5188   | 4.18461  | -1.19634 |
| C | 3.94306  | 3.52035  | 1.09816  |
| C | 1.94415  | 4.48934  | 0.06132  |
| C | 3.71171  | 3.48001  | -1.29984 |
| C | 4.42107  | 3.02776  | -0.15013 |
| C | 2.74738  | 4.21916  | 1.19778  |
| H | 4.05461  | 3.22154  | -2.28222 |
| H | 2.408    | 4.51654  | 2.17297  |
| H | 4.46551  | 3.28857  | 2.00578  |
| C | 0.51313  | 4.81132  | 0.17865  |
| C | -2.33606 | 4.66066  | 0.12349  |
| C | -0.23624 | 5.39654  | -0.86757 |
| C | -0.21746 | 4.31672  | 1.27864  |
| C | -1.60446 | 4.22805  | 1.23956  |
| C | -1.63034 | 5.32641  | -0.8904  |
| H | 0.27126  | 5.86375  | -1.69205 |
| H | 0.29675  | 3.87413  | 2.1101   |
| H | -2.10914 | 3.71543  | 2.03769  |
| H | -2.16014 | 5.72784  | -1.73655 |
| C | 5.43345  | 1.99359  | -0.22396 |
| C | 6.65873  | -0.67677 | -0.1481  |
| C | 6.15738  | 1.53511  | 0.93822  |
| C | 5.67769  | 1.25277  | -1.43731 |
| C | 6.29602  | 0.04022  | -1.43156 |

|   |          |          |          |
|---|----------|----------|----------|
| C | 6.78048  | 0.32244  | 0.97414  |
| H | 6.2216   | 2.16846  | 1.80362  |
| H | 5.34573  | 1.64637  | -2.37874 |
| H | 6.44571  | -0.48653 | -2.35764 |
| H | 7.31742  | 0.02339  | 1.85834  |
| C | -3.71217 | 4.08217  | -0.06381 |
| C | -5.62715 | 1.98283  | -0.1189  |
| C | -3.97508 | 3.37546  | -1.24727 |
| C | -4.5978  | 3.89077  | 1.01086  |
| C | -5.53531 | 2.85843  | 0.98781  |
| C | -4.92923 | 2.3618   | -1.28541 |
| H | -3.33929 | 3.51539  | -2.10225 |
| H | -4.48671 | 4.47741  | 1.90591  |
| H | -6.12868 | 2.67375  | 1.8656   |
| H | -4.99565 | 1.75541  | -2.16899 |
| C | -6.04048 | 0.56973  | 0.0163   |
| C | -5.51254 | -2.22243 | -0.01019 |
| C | -6.40188 | -0.23069 | -1.09237 |
| C | -5.68343 | -0.11357 | 1.19813  |
| C | -5.40152 | -1.47664 | 1.17386  |
| C | -6.14833 | -1.60228 | -1.10067 |
| H | -6.78747 | 0.23307  | -1.98285 |
| H | -5.4442  | 0.44112  | 2.08578  |
| H | -4.95207 | -1.92083 | 2.04253  |
| H | -6.34119 | -2.16353 | -1.99807 |
| C | -4.5918  | -3.40324 | -0.18033 |
| C | -2.08451 | -4.76038 | -0.15943 |
| C | -3.75411 | -3.40328 | -1.30637 |
| C | -4.25173 | -4.27073 | 0.87082  |
| C | -3.02207 | -4.93097 | 0.88549  |
| C | -2.54039 | -4.08201 | -1.30904 |
| H | -3.98405 | -2.76613 | -2.13971 |
| H | -4.90346 | -4.36279 | 1.72264  |
| H | -2.76357 | -5.52371 | 1.74412  |
| H | -1.88614 | -3.94693 | -2.14905 |
| C | -0.63651 | -4.97385 | 0.01394  |
| C | 2.1462   | -4.34332 | 0.25832  |
| C | 0.24372  | -5.07549 | -1.09138 |
| C | -0.0372  | -4.7716  | 1.28005  |
| C | 1.31342  | -4.46102 | 1.3966   |
| C | 1.59632  | -4.77051 | -0.97321 |
| H | -0.1452  | -5.32154 | -2.06266 |
| H | -0.64806 | -4.73942 | 2.16249  |
| H | 1.70968  | -4.24185 | 2.37103  |
| H | 2.20001  | -4.75931 | -1.8622  |

|   |         |          |          |
|---|---------|----------|----------|
| C | 3.4194  | -3.60426 | 0.3101   |
| C | 5.60953 | -1.77234 | 0.13295  |
| C | 4.46559 | -3.79757 | -0.61912 |
| C | 3.56011 | -2.52622 | 1.2083   |
| C | 4.62148 | -1.62853 | 1.1143   |
| C | 5.53514 | -2.90624 | -0.69686 |
| H | 4.43633 | -4.63542 | -1.29248 |
| H | 2.7891  | -2.32841 | 1.92852  |
| H | 4.64026 | -0.78599 | 1.77768  |
| H | 6.29958 | -3.07647 | -1.43609 |
| H | 7.61715 | -1.1753  | -0.28439 |

|                                              |                             |
|----------------------------------------------|-----------------------------|
| Zero-point correction=                       | 0.655984 (Hartree/Particle) |
| Thermal correction to Energy=                | 0.691238                    |
| Thermal correction to Enthalpy=              | 0.692182                    |
| Thermal correction to Gibbs Free Energy=     | 0.588842                    |
| Sum of electronic and zero-point Energies=   | -1848.253981                |
| Sum of electronic and thermal Energies=      | -1848.218727                |
| Sum of electronic and thermal Enthalpies=    | -1848.217783                |
| Sum of electronic and thermal Free Energies= | -1848.321123                |

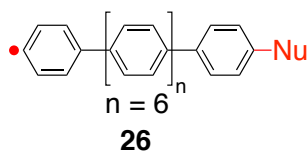

**Nu = H**

Charge = 0 Multiplicity = 2

|   |          |          |         |
|---|----------|----------|---------|
| H | -0.60931 | -2.05833 | 5.36156 |
| C | -0.31868 | -1.16064 | 5.87461 |
| C | 0.31793  | 1.16053  | 7.26537 |
| C | 0.       | 0.       | 5.13405 |
| C | -0.31793 | -1.16053 | 7.26537 |
| C | 0.       | 0.       | 8.00401 |
| C | 0.31868  | 1.16064  | 5.87461 |
| H | -0.60678 | -2.05789 | 7.78056 |
| H | 0.60931  | 2.05833  | 5.36156 |
| H | 0.60678  | 2.05789  | 7.78056 |
| C | 0.       | 0.       | 3.66512 |
| C | 0.       | 0.       | 0.79293 |
| C | 0.25535  | -1.17626 | 2.92408 |
| C | -0.25535 | 1.17626  | 2.92408 |
| C | -0.25436 | 1.17645  | 1.53365 |
| C | 0.25436  | -1.17645 | 1.53365 |

|   |          |          |          |
|---|----------|----------|----------|
| H | 0.49737  | -2.08853 | 3.43666  |
| H | -0.49737 | 2.08853  | 3.43666  |
| H | -0.49518 | 2.08871  | 1.02039  |
| H | 0.49518  | -2.08871 | 1.02039  |
| C | 0.       | 0.       | -0.6756  |
| C | 0.       | 0.       | -3.54775 |
| C | -0.33713 | -1.15556 | -1.41626 |
| C | 0.33713  | 1.15556  | -1.41626 |
| C | 0.3377   | 1.15536  | -2.80667 |
| C | -0.3377  | -1.15536 | -2.80667 |
| H | -0.64219 | -2.04842 | -0.90293 |
| H | 0.64219  | 2.04842  | -0.90293 |
| H | 0.64364  | 2.04813  | -3.31936 |
| H | -0.64364 | -2.04813 | -3.31936 |
| C | 0.       | 0.       | -5.01621 |
| C | 0.       | 0.       | -7.88879 |
| C | 0.23772  | -1.17993 | -5.7573  |
| C | -0.23772 | 1.17993  | -5.7573  |
| C | -0.23801 | 1.17983  | -7.14772 |
| C | 0.23801  | -1.17983 | -7.14772 |
| H | 0.46597  | -2.09563 | -5.24449 |
| H | -0.46597 | 2.09563  | -5.24449 |
| H | -0.46587 | 2.09558  | -7.66065 |
| H | 0.46587  | -2.09558 | -7.66065 |
| C | 0.       | 0.       | 9.47667  |
| C | 0.       | 0.       | 12.32438 |
| C | -0.31831 | 1.16061  | 10.21055 |
| C | 0.31831  | -1.16061 | 10.21055 |
| C | 0.31982  | -1.1581  | 11.60363 |
| C | -0.31982 | 1.1581   | 11.60363 |
| H | -0.59848 | 2.05966  | 9.69359  |
| H | 0.59848  | -2.05966 | 9.69359  |
| H | 0.58452  | -2.05551 | 12.13407 |
| H | -0.58452 | 2.05551  | 12.13407 |
| C | 0.       | 0.       | 13.82198 |
| C | 0.       | 0.       | 16.58004 |
| C | 0.99934  | 0.68788  | 14.53057 |
| C | -0.99934 | -0.68788 | 14.53057 |
| C | -1.00924 | -0.6953  | 15.93206 |
| C | 1.00924  | 0.6953   | 15.93206 |
| H | 1.76773  | 1.20876  | 13.9874  |
| H | -1.76773 | -1.20876 | 13.9874  |
| H | -1.77402 | -1.21953 | 16.47552 |
| H | 1.77402  | 1.21953  | 16.47552 |
| C | 0.       | 0.       | -9.35768 |

|   |          |          |           |
|---|----------|----------|-----------|
| C | 0.       | 0.       | -12.22742 |
| C | -0.33862 | -1.15508 | -10.09814 |
| C | 0.33862  | 1.15508  | -10.09814 |
| C | 0.3378   | 1.15494  | -11.4889  |
| C | -0.3378  | -1.15494 | -11.4889  |
| H | -0.64545 | -2.04752 | -9.58532  |
| H | 0.64545  | 2.04752  | -9.58532  |
| H | 0.64234  | 2.04693  | -12.00445 |
| H | -0.64234 | -2.04693 | -12.00445 |
| C | 0.       | 0.       | -13.70021 |
| C | 0.       | 0.       | -16.53054 |
| C | 0.31956  | -1.16405 | -14.43089 |
| C | -0.31956 | 1.16405  | -14.43089 |
| C | -0.32106 | 1.16272  | -15.82483 |
| C | 0.32106  | -1.16272 | -15.82483 |
| H | 0.59743  | -2.061   | -13.90892 |
| H | -0.59743 | 2.061    | -13.90892 |
| H | -0.57997 | 2.06107  | -16.35634 |
| H | 0.57997  | -2.06107 | -16.35634 |
| H | 0.       | 0.       | -17.60566 |

|                                              |                             |
|----------------------------------------------|-----------------------------|
| Zero-point correction=                       | 0.655298 (Hartree/Particle) |
| Thermal correction to Energy=                | 0.692392                    |
| Thermal correction to Enthalpy=              | 0.693336                    |
| Thermal correction to Gibbs Free Energy=     | 0.580013                    |
| Sum of electronic and zero-point Energies=   | -1848.309135                |
| Sum of electronic and thermal Energies=      | -1848.272041                |
| Sum of electronic and thermal Enthalpies=    | -1848.271097                |
| Sum of electronic and thermal Free Energies= | -1848.384420                |



**X-ray Crystallography.** Diffraction intensities for **Juasti22** were collected at 173(2) on a Bruker Apex2 CCD diffractometer using a micro-focus Incoatec I $\mu$ S CuK $\alpha$  source,  $\lambda = 1.54178$  Å. Space group were determined based on systematic absences. Absorption correction was applied by SADABS<sup>8</sup>. Structure was solved by direct methods and Fourier techniques and refined on  $F^2$  using full matrix least-squares procedures. All non-H atoms were refined with anisotropic thermal parameters. H atoms in the main molecule were refined in calculated positions in a rigid group model. The molecule has a  $Cm$  symmetry. A solvent molecule CH<sub>2</sub>Cl<sub>2</sub> is located on a mirror plane and disordered over six possible positions (two positions for the carbon atom and three positions for Cl atoms); two C positions and one Cl position are on a mirror plane and two other Cl positions are related by the mirror plane. Refinement shown that Cl atoms of the solvent molecule is disordered over there mentioned positions with the same occupation factor (0.667) and occupation factors for two carbon positions are slightly different (0.37 vs. 0.13). All calculations were performed by the Bruker SHELXTL package<sup>9</sup>.

**Crystallographic Data for Juasti22:** C<sub>49</sub>H<sub>34</sub>Cl<sub>2</sub>, (C<sub>48</sub>H<sub>32</sub>•CH<sub>2</sub>Cl<sub>2</sub>), M = 693.66, 0.23, 0.14 x 0.11 x 0.03 mm, T = 173(2) K, orthorhombic, space group  $Abm2$ ,  $a = 13.3249(9)$  Å,  $b = 26.5982(15)$  Å,  $c = 10.0862(6)$  Å,  $V = 3574.7(4)$  Å<sup>3</sup>,  $Z = 4$ ,  $D_c = 1.289$  Mg/m<sup>3</sup>,  $\mu = 1.892$  mm<sup>-1</sup>,  $F(000) = 1448$ ,  $2\theta_{\max} = 133.34^\circ$ , 10794 reflections, 2516 independent reflections [ $R_{\text{int}} = 0.0349$ ],  $R1 = 0.0750$ ,  $wR2 = 0.2148$  and  $GOF = 1.073$  for 2516

---

<sup>8</sup> G. M. Sheldrick, *Bruker/Siemens Area Detector Absorption Correction Program*, Bruker AXS, Madison, WI, 1998.

<sup>9</sup> Sheldrick, G. M. (2008). *Acta Cryst.* A64, 112-122.

reflections (239 parameters) with  $I > 2\sigma(I)$ ,  $R1 = 0.0809$ ,  $wR2 = 0.2231$  and  $GOF = 1.068$  for all reflections, max/min residual electron density  $+0.973/-0.342 \text{ e}\text{\AA}^3$ .

**Calculation of Theoretical Yield of Nanotubes from Growth**

There are 4.22 CPPs along the length of 1 nm of an armchair CNT and 1,000,000 nm in 1 mm. Multiplying 1 mg by 4,220,000 (4.22 X 1,000,000) gives approximately 4 kg.

There are  $989 \times 10^{15}$  molecules of [8]CPP in 1 mg, giving the potential to produce  $989 \times 10^{15}$  nanotubes from 1 mg of template.

**HOMO Orbital Coefficients of Fully Aryl-Substituted 27.**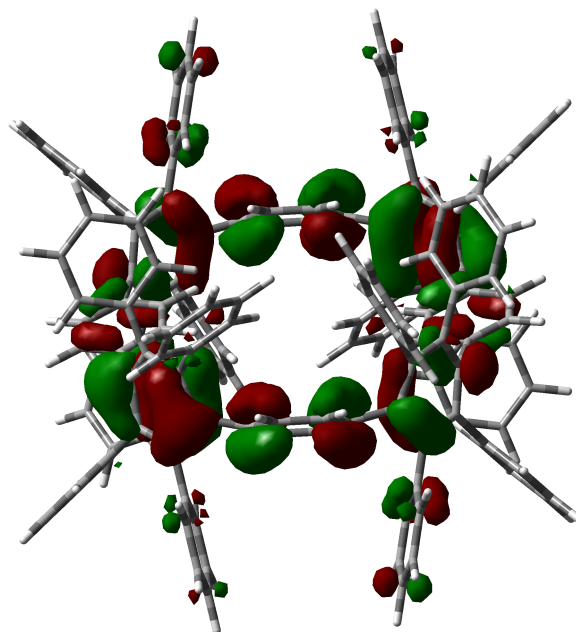

Supplement: SC-007-C5SC04218F-s001.pdf [file SC-007-C5SC04218F-s001.pdf]
